# Supplementary material for: Intragenic repeat expansion in the cell wall protein gene HPF1 controls yeast chronological aging
Source: Genome Res. 2020 May;30(5):697–710. doi: 10.1101/gr.253351.119 (PMC7263189; doi:10.1101/gr.253351.119)
Supplement: Supplemental Material [file supp_gr.253351.119_Supplemental_Table_S1.xlsx]

## Sheet: Strain list
Table S1 - Strain list
Strain name	Background	Ploidy	Genotype	Additional genetic engineering	Details	Reference
CC402	DBVPG6044	Haploid	MAT a; ho::HphMX4; ura3::KanMX4	None	WA haploid	Cubillos et al, FEMS Yeast Research, 2009
CC403	YPS128	Haploid	MAT a; ho::HphMX4; ura3::KanMX4	None	NA haploid	Cubillos et al, FEMS Yeast Research, 2009
CC406	DBVPG6044	Haploid	MAT α; ho::HphMX4; ura3::KanMX4; lys2::URA3	None	WA haploid	Cubillos et al, FEMS Yeast Research, 2009
CC407	YPS128	Haploid	MAT α; ho::HphMX4; ura3::KanMX4; lys2::URA3	None	NA haploid	Cubillos et al, FEMS Yeast Research, 2009
CC424	DBVPG6044 - Homozygote	Diploid	MAT a/α, ho::HphMX4/ho::HphMX4, ura3::KanMX4/ura3::KanMX4, lys2::URA3/LYS2	None	Control homozygote WAxWA parent	Cubillos et al, FEMS Yeast Research, 2009
CC425	DBVPG6044 - Homozygote	Diploid	MAT a/α, ho::HphMX4/ho::HphMX4, ura3::KanMX4/ura3::KanMX4, lys2::URA3/LYS2	None	Control homozygote WAxWA parent (replicat 2)	Cubillos et al, FEMS Yeast Research, 2009
CC426	DBVPG6044 - Homozygote	Diploid	MAT a/α, ho::HphMX4/ho::HphMX4, ura3::KanMX4/ura3::KanMX4, lys2::URA3/LYS2	None	Control homozygote WAxWA parent (replicat 3)	Cubillos et al, FEMS Yeast Research, 2009
CC428	DBVPG6044/YPS128 - F1 hybrid	Diploid	MAT a/α, ho::HphMX4/ho::HphMX4, ura3::KanMX4/ura3::KanMX4, lys2::URA3/LYS2	None	Control F1 NAxWA parent	Cubillos et al, FEMS Yeast Research, 2009
CC429	DBVPG6044/YPS128 - F1 hybrid	Diploid	MAT a/α, ho::HphMX4/ho::HphMX4, ura3::KanMX4/ura3::KanMX4, lys2::URA3/LYS2	None	Control F1 NAxWA parent (replicat 2)	Cubillos et al, FEMS Yeast Research, 2009
CC435	DBVPG6044/YPS128 - F1 hybrid	Diploid	MAT a/α, ho::HphMX4/ho::HphMX4, ura3::KanMX4/ura3::KanMX4, lys2::URA3/LYS2	None	Control F1 NAxWA parent (replicat 3)	Cubillos et al, FEMS Yeast Research, 2009
CC438	YPS128 - Homozygote	Diploid	MAT a/α, ho::HphMX4/ho::HphMX4, ura3::KanMX4/ura3::KanMX4, lys2::URA3/LYS2	None	Control homozygote NAxNA parent	Cubillos et al, FEMS Yeast Research, 2009
CC439	YPS128 - Homozygote	Diploid	MAT a/α, ho::HphMX4/ho::HphMX4, ura3::KanMX4/ura3::KanMX4, lys2::URA3/LYS2	None	Control homozygote NAxNA parent (replicat 2)	Cubillos et al, FEMS Yeast Research, 2009
CC440	YPS128 - Homozygote	Diploid	MAT a/α, ho::HphMX4/ho::HphMX4, ura3::KanMX4/ura3::KanMX4, lys2::URA3/LYS2	None	Control homozygote NAxNA parent (replicat 3)	Cubillos et al, FEMS Yeast Research, 2009
OS96	S288C	Haploid	MATα; ho; SUC2 gal2; mal2; mel; flo1; flo8-1; hap1; bio1; bio6	None	Lab strain	/
YGL2703	DBVPG6044	Haploid	MAT a; ho::HphMX4; ura3::KanMX4	hpf1::NatMX4	WA haploid - HPF1 deleted	This study
YGL2704	YPS128	Haploid	MAT a; ho::HphMX4; ura3::KanMX4	hpf1::NatMX4	NA haploid - HPF1 deleted	This study
YGL2705	DBVPG6044	Haploid	MAT α; ho::HphMX4; ura3::KanMX4; lys2::URA3	hpf1::NatMX4	WA haploid - HPF1 deleted	This study
YGL2706	YPS128	Haploid	MAT α; ho::HphMX4; ura3::KanMX4; lys2::URA3	hpf1::NatMX4	NA haploid - HPF1 deleted	This study
YGL2709	DBVPG6044 - Homozygote	Diploid	MAT a/α, ho::HphMX4/ho::HphMX4, ura3::KanMX4/ura3::KanMX4, lys2::URA3/LYS2	hpf1::NatMX4/HPF1	Homozygote WAxWA - HPF1; 1 copy deleted (replicat 2)	This study
YGL2710	DBVPG6044/YPS128 - F1 hybrid	Diploid	MAT a/α, ho::HphMX4/ho::HphMX4, ura3::KanMX4/ura3::KanMX4, lys2::URA3/LYS2	YPS128_hpf1::NatMX4/DBVPG6044_HPF1	F1 NAxWA hybrid - HPF1; NA allele deleted	This study
YGL2711	DBVPG6044/YPS128 - F1 hybrid	Diploid	MAT a/α, ho::HphMX4/ho::HphMX4, ura3::KanMX4/ura3::KanMX4, lys2::URA3/LYS2	YPS128_HPF1/DBVPG6044_hpf1::NatMX4	F1 NAxWA hybrid - HPF1; WA allele deleted (replicat 2)	This study
YGL2712	YPS128 - Homozygote	Diploid	MAT a/α, ho::HphMX4/ho::HphMX4, ura3::KanMX4/ura3::KanMX4, lys2::URA3/LYS2	hpf1::NatMX4/HPF1	Homozygote NAxNA - HPF1; 1 copy deleted	This study
YGL2713	DBVPG6044 - Homozygote	Diploid	MAT a/α, ho::HphMX4/ho::HphMX4, ura3::KanMX4/ura3::KanMX4, lys2::URA3/LYS2	hpf1::NatMX4/HPF1	Homozygote WAxWA - HPF1; 1 copy deleted	This study
YGL2714	DBVPG6044/YPS128 - F1 hybrid	Diploid	MAT a/α, ho::HphMX4/ho::HphMX4, ura3::KanMX4/ura3::KanMX4, lys2::URA3/LYS2	YPS128_HPF1/DBVPG6044_hpf1::NatMX4	F1 NAxWA hybrid - HPF1; WA allele deleted	This study
YGL2715	DBVPG6044 - Homozygote	Diploid	MAT a/α, ho::HphMX4/ho::HphMX4, ura3::KanMX4/ura3::KanMX4, lys2::URA3/LYS2	hpf1::NatMX4/hpf1::NatMX4	Homozygote WAxWA - HPF1; complete deletion	This study
YGL2716	DBVPG6044/YPS128 - F1 hybrid	Diploid	MAT a/α, ho::HphMX4/ho::HphMX4, ura3::KanMX4/ura3::KanMX4, lys2::URA3/LYS2	YPS128_hpf1::NatMX4/DBVPG6044_hpf1::NatMX4	F1 NAxWA hybrid - HPF1; complete deletion	This study
YGL2717	DBVPG6044/YPS128 - F1 hybrid	Diploid	MAT a/α, ho::HphMX4/ho::HphMX4, ura3::KanMX4/ura3::KanMX4, lys2::URA3/LYS2	YPS128_hpf1::NatMX4/DBVPG6044_HPF1	F1 NAxWA hybrid - HPF1; NA allele deleted (replicat 2)	This study
YGL2718	YPS128 - Homozygote	Diploid	MAT a/α, ho::HphMX4/ho::HphMX4, ura3::KanMX4/ura3::KanMX4, lys2::URA3/LYS2	hpf1::NatMX4/HPF1	Homozygote NAxNA - HPF1; 1 copy deleted (replicat 2	This study
YGL2719	DBVPG6044/YPS128 - F1 hybrid	Diploid	MAT a/α, ho::HphMX4/ho::HphMX4, ura3::KanMX4/ura3::KanMX4, lys2::URA3/LYS2	YPS128_hpf1::NatMX4/DBVPG6044_hpf1::NatMX4	F1 NAxWA hybrid - HPF1; complete deletion (replicat 2)	This study
YGL2720	YPS128 - Homozygote	Diploid	MAT a/α, ho::HphMX4/ho::HphMX4, ura3::KanMX4/ura3::KanMX4, lys2::URA3/LYS2	hpf1::NatMX4/hpf1::NatMX4	Homozygote NAxNA - HPF1; complete deletion	This study
YGL2721	DBVPG6044 - Homozygote	Diploid	MAT a/α, ho::HphMX4/ho::HphMX4, ura3::KanMX4/ura3::KanMX4, lys2::URA3/LYS2	flo11::NatMX4/FLO11	Homozygote WAxWA - FLO11; 1 copy deleted (replicat 2)	This study
YGL2722	DBVPG6044/YPS128 - F1 hybrid	Diploid	MAT a/α, ho::HphMX4/ho::HphMX4, ura3::KanMX4/ura3::KanMX4, lys2::URA3/LYS2	YPS128_flo11::NatMX4/DBVPG6044_FLO11	F1 NAxWA hybrid - FLO11; NA allele deleted	This study
YGL2723	DBVPG6044/YPS128 - F1 hybrid	Diploid	MAT a/α, ho::HphMX4/ho::HphMX4, ura3::KanMX4/ura3::KanMX4, lys2::URA3/LYS2	YPS128_FLO11/DBVPG6044_flo11::NatMX4	F1 NAxWA hybrid - FLO11; WA allele deleted (replicat 2)	This study
YGL2724	YPS128 - Homozygote	Diploid	MAT a/α, ho::HphMX4/ho::HphMX4, ura3::KanMX4/ura3::KanMX4, lys2::URA3/LYS2	flo11::NatMX4/FLO11	Homozygote NAxNA - FLO11; 1 copy deleted	This study
YGL2725	DBVPG6044 - Homozygote	Diploid	MAT a/α, ho::HphMX4/ho::HphMX4, ura3::KanMX4/ura3::KanMX4, lys2::URA3/LYS2	flo11::NatMX4/FLO11	Homozygote WAxWA - FLO11; 1 copy deleted	This study
YGL2726	DBVPG6044/YPS128 - F1 hybrid	Diploid	MAT a/α, ho::HphMX4/ho::HphMX4, ura3::KanMX4/ura3::KanMX4, lys2::URA3/LYS2	YPS128_FLO11/DBVPG6044_flo11::NatMX4	F1 NAxWA hybrid - FLO11; WA allele deleted	This study
YGL2727	DBVPG6044 - Homozygote	Diploid	MAT a/α, ho::HphMX4/ho::HphMX4, ura3::KanMX4/ura3::KanMX4, lys2::URA3/LYS2	flo11::NatMX4/flo11::NatMX4	Homozygote WAxWA - FLO11; complete deletion	This study
YGL2728	DBVPG6044/YPS128 - F1 hybrid	Diploid	MAT a/α, ho::HphMX4/ho::HphMX4, ura3::KanMX4/ura3::KanMX4, lys2::URA3/LYS2	YPS128_flo11::NatMX4/DBVPG6044_flo11::NatMX4	F1 NAxWA hybrid - FLO11; complete deletion	This study
YGL2729	DBVPG6044/YPS128 - F1 hybrid	Diploid	MAT a/α, ho::HphMX4/ho::HphMX4, ura3::KanMX4/ura3::KanMX4, lys2::URA3/LYS2	YPS128_flo11::NatMX4/DBVPG6044_FLO11	F1 NAxWA hybrid - FLO11; NA allele deleted (replicat 2)	This study
YGL2730	YPS128 - Homozygote	Diploid	MAT a/α, ho::HphMX4/ho::HphMX4, ura3::KanMX4/ura3::KanMX4, lys2::URA3/LYS2	flo11::NatMX4/FLO11	Homozygote NAxNA - FLO11; 1 copy deleted (replicat 2	This study
YGL2731	DBVPG6044/YPS128 - F1 hybrid	Diploid	MAT a/α, ho::HphMX4/ho::HphMX4, ura3::KanMX4/ura3::KanMX4, lys2::URA3/LYS2	YPS128_flo11::NatMX4/DBVPG6044_flo11::NatMX4	F1 NAxWA hybrid - FLO11; complete deletion (replicat 2)	This study
YGL2732	YPS128 - Homozygote	Diploid	MAT a/α, ho::HphMX4/ho::HphMX4, ura3::KanMX4/ura3::KanMX4, lys2::URA3/LYS2	flo11::NatMX4/flo11::NatMX4	Homozygote NAxNA - FLO11; complete deletion	This study
YGL2887	DBVPG6044/YPS128 - F1 hybrid	Diploid	MAT a/α, ho::HphMX4/ho::HphMX4, ura3::KanMX4/ura3::KanMX4, lys2::URA3/LYS2	YPS128_asg1::NatMX4/DBVPG6044_ASG1	F1 NAxWA hybrid - ASG1; NA allele deleted	This study
YGL2888	DBVPG6044/YPS128 - F1 hybrid	Diploid	MAT a/α, ho::HphMX4/ho::HphMX4, ura3::KanMX4/ura3::KanMX4, lys2::URA3/LYS2	YPS128_ASG1/DBVPG6044_asg1::NatMX4	F1 NAxWA hybrid - ASG1; WA allele deleted	This study
YGL2893	DBVPG6044/YPS128 - F1 hybrid	Diploid	MAT a/α, ho::HphMX4/ho::HphMX4, ura3::KanMX4/ura3::KanMX4, lys2::URA3/LYS2	YPS128_asg1::NatMX4/DBVPG6044_asg1::NatMX4	F1 NAxWA hybrid - ASG1; complete deletion	This study
YGL2916	S288C	Haploid	MATα; ho; SUC2 gal2; mal2; mel; flo1; flo8-1; hap1; bio1; bio6	hpf1::NatMX4	Lab strain - HPF1 deletion	This study
YGL2961	DBVPG6044/YPS128 - F1 hybrid	Diploid	MAT a/α, ho::HphMX4/ho::HphMX4, ura3::KanMX4/ura3::KanMX4, lys2::URA3/LYS2	YPS128_rpl16a::NatMX4/DBVPG6044_RPL16A	F1 NAxWA hybrid - RPL16A; NA allele deleted	This study
YGL2962	DBVPG6044/YPS128 - F1 hybrid	Diploid	MAT a/α, ho::HphMX4/ho::HphMX4, ura3::KanMX4/ura3::KanMX4, lys2::URA3/LYS2	YPS128_RPL16A/DBVPG6044_rpl16a::NatMX4	F1 NAxWA hybrid - RPL16A; WA allele deleted	This study
YGL2967	DBVPG6044/YPS128 - F1 hybrid	Diploid	MAT a/α, ho::HphMX4/ho::HphMX4, ura3::KanMX4/ura3::KanMX4, lys2::URA3/LYS2	YPS128_rpl16A::NatMX4/DBVPG6044_rpl16A::NatMX4	F1 NAxWA hybrid - RPL16A; complete deletion	This study
YGL2973	DBVPG6044/YPS128 - F1 hybrid	Diploid	MAT a/α, ho::HphMX4/ho::HphMX4, ura3::KanMX4/ura3::KanMX4, lys2::URA3/LYS2	YPS128_rpi1::NatMX4/DBVPG6044_RPI1	F1 NAxWA hybrid - RPI1; NA allele deleted	This study
YGL2974	DBVPG6044/YPS128 - F1 hybrid	Diploid	MAT a/α, ho::HphMX4/ho::HphMX4, ura3::KanMX4/ura3::KanMX4, lys2::URA3/LYS2	YPS128_RPI1/DBVPG6044_rpi1::NatMX4	F1 NAxWA hybrid - RPI1; WA allele deleted	This study
YGL2979	DBVPG6044/YPS128 - F1 hybrid	Diploid	MAT a/α, ho::HphMX4/ho::HphMX4, ura3::KanMX4/ura3::KanMX4, lys2::URA3/LYS2	YPS128_rpi1::NatMX4/DBVPG6044_rpi1::NatMX4	F1 NAxWA hybrid - RPI1; complete deletion	This study
YGL3342	DBVPG6044	Haploid	MAT a; ho::HphMX4; ura3::KanMX4	Nterm repeats_hpf1::URA3	WA haploid - HPF1 Nterm repeats deletion with URA3	This study
YGL3343	YPS128	Haploid	MAT a; ho::HphMX4; ura3::KanMX4	Nterm repeats_hpf1::URA3	NA haploid - HPF1 Nterm repeats deletion with URA3	This study
YGL3344	DBVPG6044	Haploid	MAT a; ho::HphMX4; ura3::KanMX4	Cterm repeats_hpf1::URA3	WA haploid - HPF1 Cterm repeats deletion with URA3	This study
YGL3345	YPS128	Haploid	MAT a; ho::HphMX4; ura3::KanMX4	Cterm repeats_hpf1::URA3	NA haploid - HPF1 Cterm repeats deletion with URA3	This study
YGL3346	DBVPG6044	Haploid	MAT a; ho::HphMX4; ura3::KanMX4	Internal unique region_hpf1::URA3	WA haploid - HPF1 internal unique part deletion with URA3	This study
YGL3347	YPS128	Haploid	MAT a; ho::HphMX4; ura3::KanMX4	Internal unique region_hpf1::URA3	NA haploid - HPF1 internal unique part deletion with URA3	This study
YGL3352	DBVPG6044	Haploid	MAT a; ho::HphMX4; ura3::KanMX4	WA<-Nterm_HPF1_NA	WA haploid - HPF1; WA Nterm repeats swapped with NA Nterm repeats	This study
YGL3353	YPS128	Haploid	MAT a; ho::HphMX4; ura3::KanMX4	NA<-Nterm_HPF1_WA	NA haploid - HPF1; NA Nterm repeats swapped with WA Nterm repeats	This study
YGL3354	DBVPG6044	Haploid	MAT a; ho::HphMX4; ura3::KanMX4	WA<-Cterm_HPF1_NA	WA haploid - HPF1; WA Cterm repeats swapped with NA Cterm repeats	This study
YGL3355	YPS128	Haploid	MAT a; ho::HphMX4; ura3::KanMX4	NA<-Cterm_HPF1_WA	NA haploid - HPF1; NA Cterm repeats swapped with WA Cterm repeats	This study
YGL3356	DBVPG6044	Haploid	MAT a; ho::HphMX4; ura3::KanMX4	WA<-Int_HPF1_NA	WA haploid - HPF1; WA internal swapped with NA internal	This study
YGL3357	YPS128	Haploid	MAT a; ho::HphMX4; ura3::KanMX4	NA<-Int_HPF1_WA	NA haploid - HPF1; NA internal swapped with WA internal	This study
YGL3370	DBVPG6044 - Homozygote	Diploid	MAT a/α, ho::HphMX4/ho::HphMX4, ura3::KanMX4/ura3::KanMX4, lys2::URA3/LYS2	DBVPG6044<-Nterm_HPF1_YPS128/hpf1_DBVPG6044::NatMX4	Homozygote WAxWA - HPF1; WA Nterm repeats swapped with NA Nterm repeats	This study
YGL3371	DBVPG6044/YPS128 - F1 hybrid	Diploid	MAT a/α, ho::HphMX4/ho::HphMX4, ura3::KanMX4/ura3::KanMX4, lys2::URA3/LYS2	DBVPG6044<-Nterm_HPF1_YPS128/hpf1_YPS128::NatMX4	F1 NAxWA hybrid - HPF1; WA Nterm repeats swapped with NA Nterm repeats	This study
YGL3372	DBVPG6044/YPS128 - F1 hybrid	Diploid	MAT a/α, ho::HphMX4/ho::HphMX4, ura3::KanMX4/ura3::KanMX4, lys2::URA3/LYS2	YPS128<-Nterm_HPF1_DBVPG6044/hpf1_DBVPG6044::NatMX4	F1 NAxWA hybrid - HPF1; NA Nterm repeats swapped with WA Nterm repeats	This study
YGL3373	YPS128 - Homozygote	Diploid	MAT a/α, ho::HphMX4/ho::HphMX4, ura3::KanMX4/ura3::KanMX4, lys2::URA3/LYS2	YPS128<-Nterm_HPF1_DBVPG6044/hpf1_YPS128::NatMX4	Homozygote NAxNA - HPF1; NA Nterm repeats swapped with WA Nterm repeats	This study
YGL3374	DBVPG6044 - Homozygote	Diploid	MAT a/α, ho::HphMX4/ho::HphMX4, ura3::KanMX4/ura3::KanMX4, lys2::URA3/LYS2	DBVPG6044<-Cterm_HPF1_YPS128/hpf1_DBVPG6044::NatMX4	Homozygote WAxWA - HPF1; WA Cterm repeats swapped with NA Cterm repeats	This study
YGL3375	DBVPG6044/YPS128 - F1 hybrid	Diploid	MAT a/α, ho::HphMX4/ho::HphMX4, ura3::KanMX4/ura3::KanMX4, lys2::URA3/LYS2	DBVPG6044<-Cterm_HPF1_YPS128/hpf1_YPS128::NatMX4	F1 NAxWA hybrid - HPF1; WA Cterm repeats swapped with NA Cterm repeats	This study
YGL3376	DBVPG6044/YPS128 - F1 hybrid	Diploid	MAT a/α, ho::HphMX4/ho::HphMX4, ura3::KanMX4/ura3::KanMX4, lys2::URA3/LYS2	YPS128<-Cterm_HPF1_DBVPG6044/hpf1_DBVPG6044::NatMX4	F1 NAxWA hybrid - HPF1; NA Cterm repeats swapped with WA Cterm repeats	This study
YGL3377	YPS128 - Homozygote	Diploid	MAT a/α, ho::HphMX4/ho::HphMX4, ura3::KanMX4/ura3::KanMX4, lys2::URA3/LYS2	YPS128<-Cterm_HPF1_DBVPG6044/hpf1_YPS128::NatMX4	Homozygote NAxNA - HPF1; NA Cterm repeats swapped with WA Cterm repeats	This study
YGL3378	DBVPG6044 - Homozygote	Diploid	MAT a/α, ho::HphMX4/ho::HphMX4, ura3::KanMX4/ura3::KanMX4, lys2::URA3/LYS2	DBVPG6044<-Int_HPF1_YPS128/hpf1_DBVPG6044::NatMX4	Homozygote WAxWA - HPF1; WA internal swapped with NA internal	This study
YGL3379	DBVPG6044/YPS128 - F1 hybrid	Diploid	MAT a/α, ho::HphMX4/ho::HphMX4, ura3::KanMX4/ura3::KanMX4, lys2::URA3/LYS2	DBVPG6044<-Int_HPF1_YPS128/hpf1_YPS128::NatMX4	F1 NAxWA hybrid - HPF1; WA internal swapped with NA internal	This study
YGL3380	DBVPG6044/YPS128 - F1 hybrid	Diploid	MAT a/α, ho::HphMX4/ho::HphMX4, ura3::KanMX4/ura3::KanMX4, lys2::URA3/LYS2	YPS128<-Int_HPF1_DBVPG6044/hpf1_DBVPG6044::NatMX4	F1 NAxWA hybrid - HPF1; NA internal swapped with WA internal	This study
YGL3381	YPS128 - Homozygote	Diploid	MAT a/α, ho::HphMX4/ho::HphMX4, ura3::KanMX4/ura3::KanMX4, lys2::URA3/LYS2	YPS128<-Int_HPF1_DBVPG6044/hpf1_YPS128::NatMX4	Homozygote NAxNA - HPF1; NA internal swapped with WA internal	This study
YGL3382	S288C	Haploid	MATα; ho; SUC2 gal2; mal2; mel; flo1; flo8-1; hap1; bio1; bio6	flo11::NatMX4	Lab strain - FLO11 deletion	This study
YGL3383	DBVPG6044	Haploid	MAT a; ho::HphMX4; ura3::KanMX4	flo11::NatMX4	WA haploid - FLO11 deleted	This study
YGL3384	YPS128	Haploid	MAT a; ho::HphMX4; ura3::KanMX4	flo11::NatMX4	NA haploid - FLO11 deleted	This study
YGL3385	DBVPG6044	Haploid	MAT α; ho::HphMX4; ura3::KanMX4; lys2::URA3	flo11::NatMX4	WA haploid - FLO11 deleted	This study
YGL3386	YPS128	Haploid	MAT α; ho::HphMX4; ura3::KanMX4; lys2::URA3	flo11::NatMX4	NA haploid - FLO11 deleted	This study
YGL3842	DBVPG6044/YPS128 - F1 hybrid	Diploid	MAT a/α, ho::HphMX4/ho::HphMX4, ura3::KanMX4/ura3::KanMX4, lys2::URA3/LYS2	YPS128_fkh1::NatMX4/DBVPG6044_FKH1	F1 NAxWA hybrid - FKH1; NA allele deleted	This study
YGL3843	DBVPG6044/YPS128 - F1 hybrid	Diploid	MAT a/α, ho::HphMX4/ho::HphMX4, ura3::KanMX4/ura3::KanMX4, lys2::URA3/LYS2	YPS128_FKH1/DBVPG6044_fkh1::NatMX4	F1 NAxWA hybrid - FKH1; WA allele deleted	This study
YGL3848	DBVPG6044/YPS128 - F1 hybrid	Diploid	MAT a/α, ho::HphMX4/ho::HphMX4, ura3::KanMX4/ura3::KanMX4, lys2::URA3/LYS2	YPS128_fkh1::NatMX4/DBVPG6044_fkh1::NatMX4	F1 NAxWA hybrid - FKH1; complete deletion	This study
YGL3859	DBVPG6044	Haploid	MAT α; ho::MXR1; ura3::KanMX4; lys2::URA3	None	MXR1 overexpression	This study
YGL3861	YPS128	Haploid	MAT α; ho::MXR1; ura3::KanMX4; lys2::URA3	None	MXR1 overexpression	This study
YGL3863	DBVPG6044	Haploid	MAT α; ho::SOD1; ura3::KanMX4; lys2::URA3	None	SOD1 overexpression	This study
YGL3865	YPS128	Haploid	MAT α; ho::SOD1; ura3::KanMX4; lys2::URA3	None	SOD1 overexpression	This study
YGL3867	DBVPG6044	Haploid	MAT α; ho::CTT1; ura3::KanMX4; lys2::URA3	None	CTT1 overexpression	This study
YGL3869	YPS128	Haploid	MAT α; ho::CTT1; ura3::KanMX4; lys2::URA3	None	CTT1 overexpression	This study
YGL3871	DBVPG6044/YPS128 - F1 hybrid	Diploid	MAT a/α, ho::HphMX4/ho::MXR1_OE, ura3::KanMX4/ura3::KanMX4, lys2::URA3/LYS2	YPS128_hpf1::NatMX4/DBVPG6044_HPF1	F1 NAxWA hybrid - HPF1; NA allele deleted - MXR1 overexpression	This study
YGL3873	DBVPG6044/YPS128 - F1 hybrid	Diploid	MAT a/α, ho::HphMX4/ho::MXR1_OE, ura3::KanMX4/ura3::KanMX4, lys2::URA3/LYS2	YPS128_HPF1/DBVPG6044_hpf1::NatMX4	F1 NAxWA hybrid - HPF1; WA allele deleted - MXR1 overexpression	This study
YGL3875	DBVPG6044/YPS128 - F1 hybrid	Diploid	MAT a/α, ho::HphMX4/ho::SOD1_OE, ura3::KanMX4/ura3::KanMX4, lys2::URA3/LYS2	YPS128_hpf1::NatMX4/DBVPG6044_HPF1	F1 NAxWA hybrid - HPF1; NA allele deleted - SOD1 overexpression	This study
YGL3877	DBVPG6044/YPS128 - F1 hybrid	Diploid	MAT a/α, ho::HphMX4/ho::SOD1_OE, ura3::KanMX4/ura3::KanMX4, lys2::URA3/LYS2	YPS128_HPF1/DBVPG6044_hpf1::NatMX4	F1 NAxWA hybrid - HPF1; WA allele deleted - SOD1 overexpression	This study
YGL3879	DBVPG6044/YPS128 - F1 hybrid	Diploid	MAT a/α, ho::HphMX4/ho::CTT1_OE, ura3::KanMX4/ura3::KanMX4, lys2::URA3/LYS2	YPS128_hpf1::NatMX4/DBVPG6044_HPF1	F1 NAxWA hybrid - HPF1; NA allele deleted - CTT1 overexpression	This study
YGL3881	DBVPG6044/YPS128 - F1 hybrid	Diploid	MAT a/α, ho::HphMX4/ho::CTT1_OE, ura3::KanMX4/ura3::KanMX4, lys2::URA3/LYS2	YPS128_HPF1/DBVPG6044_hpf1::NatMX4	F1 NAxWA hybrid - HPF1; WA allele deleted - CTT1 overexpression	This study
YGL3887	DBVPG6044/YPS128 - F1 hybrid	Diploid	MAT a/α, ho::HphMX4/ho::HphMX4, ura3::KanMX4/ura3::KanMX4, lys2::URA3/LYS2	YPS128<-FLO11_repeats_DBVPG6044/flo11_YPS128::NatMX4	F1 NAxWA hybrid - FLO11; NA repeats swapped with WA repeats	This study

## Sheet: POLs
Table S1 - Phased Outbred Lines
Plate number	Position	Segregant cross	Genotype
1	A1	1x201	MAT a/α, ho::HphMX4/ho::HphMX4, ura3::KanMX4/ura3::KanMX4, lys2::URA3/LYS2
1	A2	39x237	MAT a/α, ho::HphMX4/ho::HphMX4, ura3::KanMX4/ura3::KanMX4, lys2::URA3/LYS2
1	A3	3x203	MAT a/α, ho::HphMX4/ho::HphMX4, ura3::KanMX4/ura3::KanMX4, lys2::URA3/LYS2
1	A4	4x204	MAT a/α, ho::HphMX4/ho::HphMX4, ura3::KanMX4/ura3::KanMX4, lys2::URA3/LYS2
1	A5	5x205	MAT a/α, ho::HphMX4/ho::HphMX4, ura3::KanMX4/ura3::KanMX4, lys2::URA3/LYS2
1	A6	6x289	MAT a/α, ho::HphMX4/ho::HphMX4, ura3::KanMX4/ura3::KanMX4, lys2::URA3/LYS2
1	A7	7x207	MAT a/α, ho::HphMX4/ho::HphMX4, ura3::KanMX4/ura3::KanMX4, lys2::URA3/LYS2
1	A8	8x208	MAT a/α, ho::HphMX4/ho::HphMX4, ura3::KanMX4/ura3::KanMX4, lys2::URA3/LYS2
1	A9	9x209	MAT a/α, ho::HphMX4/ho::HphMX4, ura3::KanMX4/ura3::KanMX4, lys2::URA3/LYS2
1	A10	10x210	MAT a/α, ho::HphMX4/ho::HphMX4, ura3::KanMX4/ura3::KanMX4, lys2::URA3/LYS2
1	A11	1x265	MAT a/α, ho::HphMX4/ho::HphMX4, ura3::KanMX4/ura3::KanMX4, lys2::URA3/LYS2
1	A12	WAxWA (CC424)	MAT a/α, ho::HphMX4/ho::HphMX4, ura3::KanMX4/ura3::KanMX4, lys2::URA3/LYS2
1	B1	14x213	MAT a/α, ho::HphMX4/ho::HphMX4, ura3::KanMX4/ura3::KanMX4, lys2::URA3/LYS2
1	B2	15x214	MAT a/α, ho::HphMX4/ho::HphMX4, ura3::KanMX4/ura3::KanMX4, lys2::URA3/LYS2
1	B3	16x215	MAT a/α, ho::HphMX4/ho::HphMX4, ura3::KanMX4/ura3::KanMX4, lys2::URA3/LYS2
1	B4	17x216	MAT a/α, ho::HphMX4/ho::HphMX4, ura3::KanMX4/ura3::KanMX4, lys2::URA3/LYS2
1	B5	18x217	MAT a/α, ho::HphMX4/ho::HphMX4, ura3::KanMX4/ura3::KanMX4, lys2::URA3/LYS2
1	B6	19x218	MAT a/α, ho::HphMX4/ho::HphMX4, ura3::KanMX4/ura3::KanMX4, lys2::URA3/LYS2
1	B7	21x219	MAT a/α, ho::HphMX4/ho::HphMX4, ura3::KanMX4/ura3::KanMX4, lys2::URA3/LYS2
1	B8	22x220	MAT a/α, ho::HphMX4/ho::HphMX4, ura3::KanMX4/ura3::KanMX4, lys2::URA3/LYS2
1	B9	24x221	MAT a/α, ho::HphMX4/ho::HphMX4, ura3::KanMX4/ura3::KanMX4, lys2::URA3/LYS2
1	B10	25x238	MAT a/α, ho::HphMX4/ho::HphMX4, ura3::KanMX4/ura3::KanMX4, lys2::URA3/LYS2
1	B11	14x211	MAT a/α, ho::HphMX4/ho::HphMX4, ura3::KanMX4/ura3::KanMX4, lys2::URA3/LYS2
1	B12	NAxNA (CC438)	MAT a/α, ho::HphMX4/ho::HphMX4, ura3::KanMX4/ura3::KanMX4, lys2::URA3/LYS2
1	C1	28x227	MAT a/α, ho::HphMX4/ho::HphMX4, ura3::KanMX4/ura3::KanMX4, lys2::URA3/LYS2
1	C2	29x228	MAT a/α, ho::HphMX4/ho::HphMX4, ura3::KanMX4/ura3::KanMX4, lys2::URA3/LYS2
1	C3	30x229	MAT a/α, ho::HphMX4/ho::HphMX4, ura3::KanMX4/ura3::KanMX4, lys2::URA3/LYS2
1	C4	32x263	MAT a/α, ho::HphMX4/ho::HphMX4, ura3::KanMX4/ura3::KanMX4, lys2::URA3/LYS2
1	C5	33x231	MAT a/α, ho::HphMX4/ho::HphMX4, ura3::KanMX4/ura3::KanMX4, lys2::URA3/LYS2
1	C6	34x232	MAT a/α, ho::HphMX4/ho::HphMX4, ura3::KanMX4/ura3::KanMX4, lys2::URA3/LYS2
1	C7	35x233	MAT a/α, ho::HphMX4/ho::HphMX4, ura3::KanMX4/ura3::KanMX4, lys2::URA3/LYS2
1	C8	36x212	MAT a/α, ho::HphMX4/ho::HphMX4, ura3::KanMX4/ura3::KanMX4, lys2::URA3/LYS2
1	C9	37x235	MAT a/α, ho::HphMX4/ho::HphMX4, ura3::KanMX4/ura3::KanMX4, lys2::URA3/LYS2
1	C10	38x236	MAT a/α, ho::HphMX4/ho::HphMX4, ura3::KanMX4/ura3::KanMX4, lys2::URA3/LYS2
1	C11	28x291	MAT a/α, ho::HphMX4/ho::HphMX4, ura3::KanMX4/ura3::KanMX4, lys2::URA3/LYS2
1	C12	NAxWA (CC428)	MAT a/α, ho::HphMX4/ho::HphMX4, ura3::KanMX4/ura3::KanMX4, lys2::URA3/LYS2
1	D1	11x239	MAT a/α, ho::HphMX4/ho::HphMX4, ura3::KanMX4/ura3::KanMX4, lys2::URA3/LYS2
1	D2	42x241	MAT a/α, ho::HphMX4/ho::HphMX4, ura3::KanMX4/ura3::KanMX4, lys2::URA3/LYS2
1	D3	43x243	MAT a/α, ho::HphMX4/ho::HphMX4, ura3::KanMX4/ura3::KanMX4, lys2::URA3/LYS2
1	D4	44x244	MAT a/α, ho::HphMX4/ho::HphMX4, ura3::KanMX4/ura3::KanMX4, lys2::URA3/LYS2
1	D5	45x245	MAT a/α, ho::HphMX4/ho::HphMX4, ura3::KanMX4/ura3::KanMX4, lys2::URA3/LYS2
1	D6	46x246	MAT a/α, ho::HphMX4/ho::HphMX4, ura3::KanMX4/ura3::KanMX4, lys2::URA3/LYS2
1	D7	13x247	MAT a/α, ho::HphMX4/ho::HphMX4, ura3::KanMX4/ura3::KanMX4, lys2::URA3/LYS2
1	D8	27x248	MAT a/α, ho::HphMX4/ho::HphMX4, ura3::KanMX4/ura3::KanMX4, lys2::URA3/LYS2
1	D9	40x224	MAT a/α, ho::HphMX4/ho::HphMX4, ura3::KanMX4/ura3::KanMX4, lys2::URA3/LYS2
1	D10	52x252	MAT a/α, ho::HphMX4/ho::HphMX4, ura3::KanMX4/ura3::KanMX4, lys2::URA3/LYS2
1	D11	11x201	MAT a/α, ho::HphMX4/ho::HphMX4, ura3::KanMX4/ura3::KanMX4, lys2::URA3/LYS2
1	D12	WAxWA (CC425)	MAT a/α, ho::HphMX4/ho::HphMX4, ura3::KanMX4/ura3::KanMX4, lys2::URA3/LYS2
1	E1	26x253	MAT a/α, ho::HphMX4/ho::HphMX4, ura3::KanMX4/ura3::KanMX4, lys2::URA3/LYS2
1	E2	51x251	MAT a/α, ho::HphMX4/ho::HphMX4, ura3::KanMX4/ura3::KanMX4, lys2::URA3/LYS2
1	E3	55x255	MAT a/α, ho::HphMX4/ho::HphMX4, ura3::KanMX4/ura3::KanMX4, lys2::URA3/LYS2
1	E4	56x276	MAT a/α, ho::HphMX4/ho::HphMX4, ura3::KanMX4/ura3::KanMX4, lys2::URA3/LYS2
1	E5	57x257	MAT a/α, ho::HphMX4/ho::HphMX4, ura3::KanMX4/ura3::KanMX4, lys2::URA3/LYS2
1	E6	132x305	MAT a/α, ho::HphMX4/ho::HphMX4, ura3::KanMX4/ura3::KanMX4, lys2::URA3/LYS2
1	E7	59x259	MAT a/α, ho::HphMX4/ho::HphMX4, ura3::KanMX4/ura3::KanMX4, lys2::URA3/LYS2
1	E8	60x260	MAT a/α, ho::HphMX4/ho::HphMX4, ura3::KanMX4/ura3::KanMX4, lys2::URA3/LYS2
1	E9	61x261	MAT a/α, ho::HphMX4/ho::HphMX4, ura3::KanMX4/ura3::KanMX4, lys2::URA3/LYS2
1	E10	62x262	MAT a/α, ho::HphMX4/ho::HphMX4, ura3::KanMX4/ura3::KanMX4, lys2::URA3/LYS2
1	E11	26x213	MAT a/α, ho::HphMX4/ho::HphMX4, ura3::KanMX4/ura3::KanMX4, lys2::URA3/LYS2
1	E12	NAxNA (CC439)	MAT a/α, ho::HphMX4/ho::HphMX4, ura3::KanMX4/ura3::KanMX4, lys2::URA3/LYS2
1	F1	65x265	MAT a/α, ho::HphMX4/ho::HphMX4, ura3::KanMX4/ura3::KanMX4, lys2::URA3/LYS2
1	F2	66x266	MAT a/α, ho::HphMX4/ho::HphMX4, ura3::KanMX4/ura3::KanMX4, lys2::URA3/LYS2
1	F3	63x267	MAT a/α, ho::HphMX4/ho::HphMX4, ura3::KanMX4/ura3::KanMX4, lys2::URA3/LYS2
1	F4	68x268	MAT a/α, ho::HphMX4/ho::HphMX4, ura3::KanMX4/ura3::KanMX4, lys2::URA3/LYS2
1	F5	69x270	MAT a/α, ho::HphMX4/ho::HphMX4, ura3::KanMX4/ura3::KanMX4, lys2::URA3/LYS2
1	F6	70x271	MAT a/α, ho::HphMX4/ho::HphMX4, ura3::KanMX4/ura3::KanMX4, lys2::URA3/LYS2
1	F7	71x272	MAT a/α, ho::HphMX4/ho::HphMX4, ura3::KanMX4/ura3::KanMX4, lys2::URA3/LYS2
1	F8	72x273	MAT a/α, ho::HphMX4/ho::HphMX4, ura3::KanMX4/ura3::KanMX4, lys2::URA3/LYS2
1	F9	73x274	MAT a/α, ho::HphMX4/ho::HphMX4, ura3::KanMX4/ura3::KanMX4, lys2::URA3/LYS2
1	F10	74x275	MAT a/α, ho::HphMX4/ho::HphMX4, ura3::KanMX4/ura3::KanMX4, lys2::URA3/LYS2
1	F11	65x227	MAT a/α, ho::HphMX4/ho::HphMX4, ura3::KanMX4/ura3::KanMX4, lys2::URA3/LYS2
1	F12	NAxWA (CC429)	MAT a/α, ho::HphMX4/ho::HphMX4, ura3::KanMX4/ura3::KanMX4, lys2::URA3/LYS2
1	G1	77x211	MAT a/α, ho::HphMX4/ho::HphMX4, ura3::KanMX4/ura3::KanMX4, lys2::URA3/LYS2
1	G2	78x279	MAT a/α, ho::HphMX4/ho::HphMX4, ura3::KanMX4/ura3::KanMX4, lys2::URA3/LYS2
1	G3	75x280	MAT a/α, ho::HphMX4/ho::HphMX4, ura3::KanMX4/ura3::KanMX4, lys2::URA3/LYS2
1	G4	80x281	MAT a/α, ho::HphMX4/ho::HphMX4, ura3::KanMX4/ura3::KanMX4, lys2::URA3/LYS2
1	G5	81x282	MAT a/α, ho::HphMX4/ho::HphMX4, ura3::KanMX4/ura3::KanMX4, lys2::URA3/LYS2
1	G6	82x283	MAT a/α, ho::HphMX4/ho::HphMX4, ura3::KanMX4/ura3::KanMX4, lys2::URA3/LYS2
1	G7	83x284	MAT a/α, ho::HphMX4/ho::HphMX4, ura3::KanMX4/ura3::KanMX4, lys2::URA3/LYS2
1	G8	84x286	MAT a/α, ho::HphMX4/ho::HphMX4, ura3::KanMX4/ura3::KanMX4, lys2::URA3/LYS2
1	G9	85x287	MAT a/α, ho::HphMX4/ho::HphMX4, ura3::KanMX4/ura3::KanMX4, lys2::URA3/LYS2
1	G10	86x277	MAT a/α, ho::HphMX4/ho::HphMX4, ura3::KanMX4/ura3::KanMX4, lys2::URA3/LYS2
1	G11	77x239	MAT a/α, ho::HphMX4/ho::HphMX4, ura3::KanMX4/ura3::KanMX4, lys2::URA3/LYS2
1	G12	WAxWA (CC426)	MAT a/α, ho::HphMX4/ho::HphMX4, ura3::KanMX4/ura3::KanMX4, lys2::URA3/LYS2
1	H1	121x291	MAT a/α, ho::HphMX4/ho::HphMX4, ura3::KanMX4/ura3::KanMX4, lys2::URA3/LYS2
1	H2	122x292	MAT a/α, ho::HphMX4/ho::HphMX4, ura3::KanMX4/ura3::KanMX4, lys2::URA3/LYS2
1	H3	123x293	MAT a/α, ho::HphMX4/ho::HphMX4, ura3::KanMX4/ura3::KanMX4, lys2::URA3/LYS2
1	H4	124x295	MAT a/α, ho::HphMX4/ho::HphMX4, ura3::KanMX4/ura3::KanMX4, lys2::URA3/LYS2
1	H5	126x296	MAT a/α, ho::HphMX4/ho::HphMX4, ura3::KanMX4/ura3::KanMX4, lys2::URA3/LYS2
1	H6	127x297	MAT a/α, ho::HphMX4/ho::HphMX4, ura3::KanMX4/ura3::KanMX4, lys2::URA3/LYS2
1	H7	128x298	MAT a/α, ho::HphMX4/ho::HphMX4, ura3::KanMX4/ura3::KanMX4, lys2::URA3/LYS2
1	H8	129x300	MAT a/α, ho::HphMX4/ho::HphMX4, ura3::KanMX4/ura3::KanMX4, lys2::URA3/LYS2
1	H9	130x301	MAT a/α, ho::HphMX4/ho::HphMX4, ura3::KanMX4/ura3::KanMX4, lys2::URA3/LYS2
1	H10	131x304	MAT a/α, ho::HphMX4/ho::HphMX4, ura3::KanMX4/ura3::KanMX4, lys2::URA3/LYS2
1	H11	121x253	MAT a/α, ho::HphMX4/ho::HphMX4, ura3::KanMX4/ura3::KanMX4, lys2::URA3/LYS2
1	H12	NAxNA (CC440)	MAT a/α, ho::HphMX4/ho::HphMX4, ura3::KanMX4/ura3::KanMX4, lys2::URA3/LYS2
2	A1	1x210	MAT a/α, ho::HphMX4/ho::HphMX4, ura3::KanMX4/ura3::KanMX4, lys2::URA3/LYS2
2	A2	39x201	MAT a/α, ho::HphMX4/ho::HphMX4, ura3::KanMX4/ura3::KanMX4, lys2::URA3/LYS2
2	A3	3x237	MAT a/α, ho::HphMX4/ho::HphMX4, ura3::KanMX4/ura3::KanMX4, lys2::URA3/LYS2
2	A4	4x203	MAT a/α, ho::HphMX4/ho::HphMX4, ura3::KanMX4/ura3::KanMX4, lys2::URA3/LYS2
2	A5	5x204	MAT a/α, ho::HphMX4/ho::HphMX4, ura3::KanMX4/ura3::KanMX4, lys2::URA3/LYS2
2	A6	6x205	MAT a/α, ho::HphMX4/ho::HphMX4, ura3::KanMX4/ura3::KanMX4, lys2::URA3/LYS2
2	A7	7x289	MAT a/α, ho::HphMX4/ho::HphMX4, ura3::KanMX4/ura3::KanMX4, lys2::URA3/LYS2
2	A8	8x207	MAT a/α, ho::HphMX4/ho::HphMX4, ura3::KanMX4/ura3::KanMX4, lys2::URA3/LYS2
2	A9	9x208	MAT a/α, ho::HphMX4/ho::HphMX4, ura3::KanMX4/ura3::KanMX4, lys2::URA3/LYS2
2	A10	10x209	MAT a/α, ho::HphMX4/ho::HphMX4, ura3::KanMX4/ura3::KanMX4, lys2::URA3/LYS2
2	A11	39x266	MAT a/α, ho::HphMX4/ho::HphMX4, ura3::KanMX4/ura3::KanMX4, lys2::URA3/LYS2
2	A12	WAxWA (CC424)	MAT a/α, ho::HphMX4/ho::HphMX4, ura3::KanMX4/ura3::KanMX4, lys2::URA3/LYS2
2	B1	14x238	MAT a/α, ho::HphMX4/ho::HphMX4, ura3::KanMX4/ura3::KanMX4, lys2::URA3/LYS2
2	B2	15x213	MAT a/α, ho::HphMX4/ho::HphMX4, ura3::KanMX4/ura3::KanMX4, lys2::URA3/LYS2
2	B3	16x214	MAT a/α, ho::HphMX4/ho::HphMX4, ura3::KanMX4/ura3::KanMX4, lys2::URA3/LYS2
2	B4	17x215	MAT a/α, ho::HphMX4/ho::HphMX4, ura3::KanMX4/ura3::KanMX4, lys2::URA3/LYS2
2	B5	18x216	MAT a/α, ho::HphMX4/ho::HphMX4, ura3::KanMX4/ura3::KanMX4, lys2::URA3/LYS2
2	B6	19x217	MAT a/α, ho::HphMX4/ho::HphMX4, ura3::KanMX4/ura3::KanMX4, lys2::URA3/LYS2
2	B7	21x218	MAT a/α, ho::HphMX4/ho::HphMX4, ura3::KanMX4/ura3::KanMX4, lys2::URA3/LYS2
2	B8	22x219	MAT a/α, ho::HphMX4/ho::HphMX4, ura3::KanMX4/ura3::KanMX4, lys2::URA3/LYS2
2	B9	24x220	MAT a/α, ho::HphMX4/ho::HphMX4, ura3::KanMX4/ura3::KanMX4, lys2::URA3/LYS2
2	B10	25x221	MAT a/α, ho::HphMX4/ho::HphMX4, ura3::KanMX4/ura3::KanMX4, lys2::URA3/LYS2
2	B11	15x279	MAT a/α, ho::HphMX4/ho::HphMX4, ura3::KanMX4/ura3::KanMX4, lys2::URA3/LYS2
2	B12	NAxNA (CC438)	MAT a/α, ho::HphMX4/ho::HphMX4, ura3::KanMX4/ura3::KanMX4, lys2::URA3/LYS2
2	C1	28x236	MAT a/α, ho::HphMX4/ho::HphMX4, ura3::KanMX4/ura3::KanMX4, lys2::URA3/LYS2
2	C2	29x227	MAT a/α, ho::HphMX4/ho::HphMX4, ura3::KanMX4/ura3::KanMX4, lys2::URA3/LYS2
2	C3	30x228	MAT a/α, ho::HphMX4/ho::HphMX4, ura3::KanMX4/ura3::KanMX4, lys2::URA3/LYS2
2	C4	32x229	MAT a/α, ho::HphMX4/ho::HphMX4, ura3::KanMX4/ura3::KanMX4, lys2::URA3/LYS2
2	C5	33x263	MAT a/α, ho::HphMX4/ho::HphMX4, ura3::KanMX4/ura3::KanMX4, lys2::URA3/LYS2
2	C6	34x231	MAT a/α, ho::HphMX4/ho::HphMX4, ura3::KanMX4/ura3::KanMX4, lys2::URA3/LYS2
2	C7	35x232	MAT a/α, ho::HphMX4/ho::HphMX4, ura3::KanMX4/ura3::KanMX4, lys2::URA3/LYS2
2	C8	36x233	MAT a/α, ho::HphMX4/ho::HphMX4, ura3::KanMX4/ura3::KanMX4, lys2::URA3/LYS2
2	C9	37x212	MAT a/α, ho::HphMX4/ho::HphMX4, ura3::KanMX4/ura3::KanMX4, lys2::URA3/LYS2
2	C10	38x235	MAT a/α, ho::HphMX4/ho::HphMX4, ura3::KanMX4/ura3::KanMX4, lys2::URA3/LYS2
2	C11	29x292	MAT a/α, ho::HphMX4/ho::HphMX4, ura3::KanMX4/ura3::KanMX4, lys2::URA3/LYS2
2	C12	NAxWA (CC428)	MAT a/α, ho::HphMX4/ho::HphMX4, ura3::KanMX4/ura3::KanMX4, lys2::URA3/LYS2
2	D1	11x252	MAT a/α, ho::HphMX4/ho::HphMX4, ura3::KanMX4/ura3::KanMX4, lys2::URA3/LYS2
2	D2	42x239	MAT a/α, ho::HphMX4/ho::HphMX4, ura3::KanMX4/ura3::KanMX4, lys2::URA3/LYS2
2	D3	43x241	MAT a/α, ho::HphMX4/ho::HphMX4, ura3::KanMX4/ura3::KanMX4, lys2::URA3/LYS2
2	D4	44x243	MAT a/α, ho::HphMX4/ho::HphMX4, ura3::KanMX4/ura3::KanMX4, lys2::URA3/LYS2
2	D5	45x244	MAT a/α, ho::HphMX4/ho::HphMX4, ura3::KanMX4/ura3::KanMX4, lys2::URA3/LYS2
2	D6	46x245	MAT a/α, ho::HphMX4/ho::HphMX4, ura3::KanMX4/ura3::KanMX4, lys2::URA3/LYS2
2	D7	13x246	MAT a/α, ho::HphMX4/ho::HphMX4, ura3::KanMX4/ura3::KanMX4, lys2::URA3/LYS2
2	D8	27x247	MAT a/α, ho::HphMX4/ho::HphMX4, ura3::KanMX4/ura3::KanMX4, lys2::URA3/LYS2
2	D9	40x248	MAT a/α, ho::HphMX4/ho::HphMX4, ura3::KanMX4/ura3::KanMX4, lys2::URA3/LYS2
2	D10	52x224	MAT a/α, ho::HphMX4/ho::HphMX4, ura3::KanMX4/ura3::KanMX4, lys2::URA3/LYS2
2	D11	42x237	MAT a/α, ho::HphMX4/ho::HphMX4, ura3::KanMX4/ura3::KanMX4, lys2::URA3/LYS2
2	D12	WAxWA (CC425)	MAT a/α, ho::HphMX4/ho::HphMX4, ura3::KanMX4/ura3::KanMX4, lys2::URA3/LYS2
2	E1	26x262	MAT a/α, ho::HphMX4/ho::HphMX4, ura3::KanMX4/ura3::KanMX4, lys2::URA3/LYS2
2	E2	51x253	MAT a/α, ho::HphMX4/ho::HphMX4, ura3::KanMX4/ura3::KanMX4, lys2::URA3/LYS2
2	E3	55x251	MAT a/α, ho::HphMX4/ho::HphMX4, ura3::KanMX4/ura3::KanMX4, lys2::URA3/LYS2
2	E4	56x255	MAT a/α, ho::HphMX4/ho::HphMX4, ura3::KanMX4/ura3::KanMX4, lys2::URA3/LYS2
2	E5	57x276	MAT a/α, ho::HphMX4/ho::HphMX4, ura3::KanMX4/ura3::KanMX4, lys2::URA3/LYS2
2	E6	132x257	MAT a/α, ho::HphMX4/ho::HphMX4, ura3::KanMX4/ura3::KanMX4, lys2::URA3/LYS2
2	E7	59x305	MAT a/α, ho::HphMX4/ho::HphMX4, ura3::KanMX4/ura3::KanMX4, lys2::URA3/LYS2
2	E8	60x259	MAT a/α, ho::HphMX4/ho::HphMX4, ura3::KanMX4/ura3::KanMX4, lys2::URA3/LYS2
2	E9	61x260	MAT a/α, ho::HphMX4/ho::HphMX4, ura3::KanMX4/ura3::KanMX4, lys2::URA3/LYS2
2	E10	62x261	MAT a/α, ho::HphMX4/ho::HphMX4, ura3::KanMX4/ura3::KanMX4, lys2::URA3/LYS2
2	E11	51x214	MAT a/α, ho::HphMX4/ho::HphMX4, ura3::KanMX4/ura3::KanMX4, lys2::URA3/LYS2
2	E12	NAxNA (CC439)	MAT a/α, ho::HphMX4/ho::HphMX4, ura3::KanMX4/ura3::KanMX4, lys2::URA3/LYS2
2	F1	65x275	MAT a/α, ho::HphMX4/ho::HphMX4, ura3::KanMX4/ura3::KanMX4, lys2::URA3/LYS2
2	F2	66x265	MAT a/α, ho::HphMX4/ho::HphMX4, ura3::KanMX4/ura3::KanMX4, lys2::URA3/LYS2
2	F3	63x266	MAT a/α, ho::HphMX4/ho::HphMX4, ura3::KanMX4/ura3::KanMX4, lys2::URA3/LYS2
2	F4	68x267	MAT a/α, ho::HphMX4/ho::HphMX4, ura3::KanMX4/ura3::KanMX4, lys2::URA3/LYS2
2	F5	69x268	MAT a/α, ho::HphMX4/ho::HphMX4, ura3::KanMX4/ura3::KanMX4, lys2::URA3/LYS2
2	F6	70x270	MAT a/α, ho::HphMX4/ho::HphMX4, ura3::KanMX4/ura3::KanMX4, lys2::URA3/LYS2
2	F7	71x271	MAT a/α, ho::HphMX4/ho::HphMX4, ura3::KanMX4/ura3::KanMX4, lys2::URA3/LYS2
2	F8	72x272	MAT a/α, ho::HphMX4/ho::HphMX4, ura3::KanMX4/ura3::KanMX4, lys2::URA3/LYS2
2	F9	73x273	MAT a/α, ho::HphMX4/ho::HphMX4, ura3::KanMX4/ura3::KanMX4, lys2::URA3/LYS2
2	F10	74x274	MAT a/α, ho::HphMX4/ho::HphMX4, ura3::KanMX4/ura3::KanMX4, lys2::URA3/LYS2
2	F11	66x228	MAT a/α, ho::HphMX4/ho::HphMX4, ura3::KanMX4/ura3::KanMX4, lys2::URA3/LYS2
2	F12	NAxWA (CC429)	MAT a/α, ho::HphMX4/ho::HphMX4, ura3::KanMX4/ura3::KanMX4, lys2::URA3/LYS2
2	G1	77x277	MAT a/α, ho::HphMX4/ho::HphMX4, ura3::KanMX4/ura3::KanMX4, lys2::URA3/LYS2
2	G2	78x211	MAT a/α, ho::HphMX4/ho::HphMX4, ura3::KanMX4/ura3::KanMX4, lys2::URA3/LYS2
2	G3	75x279	MAT a/α, ho::HphMX4/ho::HphMX4, ura3::KanMX4/ura3::KanMX4, lys2::URA3/LYS2
2	G4	80x280	MAT a/α, ho::HphMX4/ho::HphMX4, ura3::KanMX4/ura3::KanMX4, lys2::URA3/LYS2
2	G5	81x281	MAT a/α, ho::HphMX4/ho::HphMX4, ura3::KanMX4/ura3::KanMX4, lys2::URA3/LYS2
2	G6	82x282	MAT a/α, ho::HphMX4/ho::HphMX4, ura3::KanMX4/ura3::KanMX4, lys2::URA3/LYS2
2	G7	83x283	MAT a/α, ho::HphMX4/ho::HphMX4, ura3::KanMX4/ura3::KanMX4, lys2::URA3/LYS2
2	G8	84x284	MAT a/α, ho::HphMX4/ho::HphMX4, ura3::KanMX4/ura3::KanMX4, lys2::URA3/LYS2
2	G9	85x286	MAT a/α, ho::HphMX4/ho::HphMX4, ura3::KanMX4/ura3::KanMX4, lys2::URA3/LYS2
2	G10	86x287	MAT a/α, ho::HphMX4/ho::HphMX4, ura3::KanMX4/ura3::KanMX4, lys2::URA3/LYS2
2	G11	78x241	MAT a/α, ho::HphMX4/ho::HphMX4, ura3::KanMX4/ura3::KanMX4, lys2::URA3/LYS2
2	G12	WAxWA (CC426)	MAT a/α, ho::HphMX4/ho::HphMX4, ura3::KanMX4/ura3::KanMX4, lys2::URA3/LYS2
2	H1	121x304	MAT a/α, ho::HphMX4/ho::HphMX4, ura3::KanMX4/ura3::KanMX4, lys2::URA3/LYS2
2	H2	122x291	MAT a/α, ho::HphMX4/ho::HphMX4, ura3::KanMX4/ura3::KanMX4, lys2::URA3/LYS2
2	H3	123x292	MAT a/α, ho::HphMX4/ho::HphMX4, ura3::KanMX4/ura3::KanMX4, lys2::URA3/LYS2
2	H4	124x293	MAT a/α, ho::HphMX4/ho::HphMX4, ura3::KanMX4/ura3::KanMX4, lys2::URA3/LYS2
2	H5	126x295	MAT a/α, ho::HphMX4/ho::HphMX4, ura3::KanMX4/ura3::KanMX4, lys2::URA3/LYS2
2	H6	127x296	MAT a/α, ho::HphMX4/ho::HphMX4, ura3::KanMX4/ura3::KanMX4, lys2::URA3/LYS2
2	H7	128x297	MAT a/α, ho::HphMX4/ho::HphMX4, ura3::KanMX4/ura3::KanMX4, lys2::URA3/LYS2
2	H8	129x298	MAT a/α, ho::HphMX4/ho::HphMX4, ura3::KanMX4/ura3::KanMX4, lys2::URA3/LYS2
2	H9	130x300	MAT a/α, ho::HphMX4/ho::HphMX4, ura3::KanMX4/ura3::KanMX4, lys2::URA3/LYS2
2	H10	131x301	MAT a/α, ho::HphMX4/ho::HphMX4, ura3::KanMX4/ura3::KanMX4, lys2::URA3/LYS2
2	H11	122x251	MAT a/α, ho::HphMX4/ho::HphMX4, ura3::KanMX4/ura3::KanMX4, lys2::URA3/LYS2
2	H12	NAxNA (CC440)	MAT a/α, ho::HphMX4/ho::HphMX4, ura3::KanMX4/ura3::KanMX4, lys2::URA3/LYS2
3	A1	1x209	MAT a/α, ho::HphMX4/ho::HphMX4, ura3::KanMX4/ura3::KanMX4, lys2::URA3/LYS2
3	A2	39x210	MAT a/α, ho::HphMX4/ho::HphMX4, ura3::KanMX4/ura3::KanMX4, lys2::URA3/LYS2
3	A3	3x201	MAT a/α, ho::HphMX4/ho::HphMX4, ura3::KanMX4/ura3::KanMX4, lys2::URA3/LYS2
3	A4	4x237	MAT a/α, ho::HphMX4/ho::HphMX4, ura3::KanMX4/ura3::KanMX4, lys2::URA3/LYS2
3	A5	5x203	MAT a/α, ho::HphMX4/ho::HphMX4, ura3::KanMX4/ura3::KanMX4, lys2::URA3/LYS2
3	A6	6x204	MAT a/α, ho::HphMX4/ho::HphMX4, ura3::KanMX4/ura3::KanMX4, lys2::URA3/LYS2
3	A7	7x205	MAT a/α, ho::HphMX4/ho::HphMX4, ura3::KanMX4/ura3::KanMX4, lys2::URA3/LYS2
3	A8	8x289	MAT a/α, ho::HphMX4/ho::HphMX4, ura3::KanMX4/ura3::KanMX4, lys2::URA3/LYS2
3	A9	9x207	MAT a/α, ho::HphMX4/ho::HphMX4, ura3::KanMX4/ura3::KanMX4, lys2::URA3/LYS2
3	A10	10x208	MAT a/α, ho::HphMX4/ho::HphMX4, ura3::KanMX4/ura3::KanMX4, lys2::URA3/LYS2
3	A11	3x267	MAT a/α, ho::HphMX4/ho::HphMX4, ura3::KanMX4/ura3::KanMX4, lys2::URA3/LYS2
3	A12	WAxWA (CC424)	MAT a/α, ho::HphMX4/ho::HphMX4, ura3::KanMX4/ura3::KanMX4, lys2::URA3/LYS2
3	B1	14x221	MAT a/α, ho::HphMX4/ho::HphMX4, ura3::KanMX4/ura3::KanMX4, lys2::URA3/LYS2
3	B2	15x238	MAT a/α, ho::HphMX4/ho::HphMX4, ura3::KanMX4/ura3::KanMX4, lys2::URA3/LYS2
3	B3	16x213	MAT a/α, ho::HphMX4/ho::HphMX4, ura3::KanMX4/ura3::KanMX4, lys2::URA3/LYS2
3	B4	17x214	MAT a/α, ho::HphMX4/ho::HphMX4, ura3::KanMX4/ura3::KanMX4, lys2::URA3/LYS2
3	B5	18x215	MAT a/α, ho::HphMX4/ho::HphMX4, ura3::KanMX4/ura3::KanMX4, lys2::URA3/LYS2
3	B6	19x216	MAT a/α, ho::HphMX4/ho::HphMX4, ura3::KanMX4/ura3::KanMX4, lys2::URA3/LYS2
3	B7	21x217	MAT a/α, ho::HphMX4/ho::HphMX4, ura3::KanMX4/ura3::KanMX4, lys2::URA3/LYS2
3	B8	22x218	MAT a/α, ho::HphMX4/ho::HphMX4, ura3::KanMX4/ura3::KanMX4, lys2::URA3/LYS2
3	B9	24x219	MAT a/α, ho::HphMX4/ho::HphMX4, ura3::KanMX4/ura3::KanMX4, lys2::URA3/LYS2
3	B10	25x220	MAT a/α, ho::HphMX4/ho::HphMX4, ura3::KanMX4/ura3::KanMX4, lys2::URA3/LYS2
3	B11	16x280	MAT a/α, ho::HphMX4/ho::HphMX4, ura3::KanMX4/ura3::KanMX4, lys2::URA3/LYS2
3	B12	NAxNA (CC438)	MAT a/α, ho::HphMX4/ho::HphMX4, ura3::KanMX4/ura3::KanMX4, lys2::URA3/LYS2
3	C1	28x235	MAT a/α, ho::HphMX4/ho::HphMX4, ura3::KanMX4/ura3::KanMX4, lys2::URA3/LYS2
3	C2	29x236	MAT a/α, ho::HphMX4/ho::HphMX4, ura3::KanMX4/ura3::KanMX4, lys2::URA3/LYS2
3	C3	30x227	MAT a/α, ho::HphMX4/ho::HphMX4, ura3::KanMX4/ura3::KanMX4, lys2::URA3/LYS2
3	C4	32x228	MAT a/α, ho::HphMX4/ho::HphMX4, ura3::KanMX4/ura3::KanMX4, lys2::URA3/LYS2
3	C5	33x229	MAT a/α, ho::HphMX4/ho::HphMX4, ura3::KanMX4/ura3::KanMX4, lys2::URA3/LYS2
3	C6	34x263	MAT a/α, ho::HphMX4/ho::HphMX4, ura3::KanMX4/ura3::KanMX4, lys2::URA3/LYS2
3	C7	35x231	MAT a/α, ho::HphMX4/ho::HphMX4, ura3::KanMX4/ura3::KanMX4, lys2::URA3/LYS2
3	C8	36x232	MAT a/α, ho::HphMX4/ho::HphMX4, ura3::KanMX4/ura3::KanMX4, lys2::URA3/LYS2
3	C9	37x233	MAT a/α, ho::HphMX4/ho::HphMX4, ura3::KanMX4/ura3::KanMX4, lys2::URA3/LYS2
3	C10	38x212	MAT a/α, ho::HphMX4/ho::HphMX4, ura3::KanMX4/ura3::KanMX4, lys2::URA3/LYS2
3	C11	30x293	MAT a/α, ho::HphMX4/ho::HphMX4, ura3::KanMX4/ura3::KanMX4, lys2::URA3/LYS2
3	C12	NAxWA (CC428)	MAT a/α, ho::HphMX4/ho::HphMX4, ura3::KanMX4/ura3::KanMX4, lys2::URA3/LYS2
3	D1	11x224	MAT a/α, ho::HphMX4/ho::HphMX4, ura3::KanMX4/ura3::KanMX4, lys2::URA3/LYS2
3	D2	42x252	MAT a/α, ho::HphMX4/ho::HphMX4, ura3::KanMX4/ura3::KanMX4, lys2::URA3/LYS2
3	D3	43x239	MAT a/α, ho::HphMX4/ho::HphMX4, ura3::KanMX4/ura3::KanMX4, lys2::URA3/LYS2
3	D4	44x241	MAT a/α, ho::HphMX4/ho::HphMX4, ura3::KanMX4/ura3::KanMX4, lys2::URA3/LYS2
3	D5	45x243	MAT a/α, ho::HphMX4/ho::HphMX4, ura3::KanMX4/ura3::KanMX4, lys2::URA3/LYS2
3	D6	46x244	MAT a/α, ho::HphMX4/ho::HphMX4, ura3::KanMX4/ura3::KanMX4, lys2::URA3/LYS2
3	D7	13x245	MAT a/α, ho::HphMX4/ho::HphMX4, ura3::KanMX4/ura3::KanMX4, lys2::URA3/LYS2
3	D8	27x246	MAT a/α, ho::HphMX4/ho::HphMX4, ura3::KanMX4/ura3::KanMX4, lys2::URA3/LYS2
3	D9	40x247	MAT a/α, ho::HphMX4/ho::HphMX4, ura3::KanMX4/ura3::KanMX4, lys2::URA3/LYS2
3	D10	52x248	MAT a/α, ho::HphMX4/ho::HphMX4, ura3::KanMX4/ura3::KanMX4, lys2::URA3/LYS2
3	D11	43x203	MAT a/α, ho::HphMX4/ho::HphMX4, ura3::KanMX4/ura3::KanMX4, lys2::URA3/LYS2
3	D12	WAxWA (CC425)	MAT a/α, ho::HphMX4/ho::HphMX4, ura3::KanMX4/ura3::KanMX4, lys2::URA3/LYS2
3	E1	26x261	MAT a/α, ho::HphMX4/ho::HphMX4, ura3::KanMX4/ura3::KanMX4, lys2::URA3/LYS2
3	E2	51x262	MAT a/α, ho::HphMX4/ho::HphMX4, ura3::KanMX4/ura3::KanMX4, lys2::URA3/LYS2
3	E3	55x253	MAT a/α, ho::HphMX4/ho::HphMX4, ura3::KanMX4/ura3::KanMX4, lys2::URA3/LYS2
3	E4	56x251	MAT a/α, ho::HphMX4/ho::HphMX4, ura3::KanMX4/ura3::KanMX4, lys2::URA3/LYS2
3	E5	57x255	MAT a/α, ho::HphMX4/ho::HphMX4, ura3::KanMX4/ura3::KanMX4, lys2::URA3/LYS2
3	E6	132x276	MAT a/α, ho::HphMX4/ho::HphMX4, ura3::KanMX4/ura3::KanMX4, lys2::URA3/LYS2
3	E7	59x257	MAT a/α, ho::HphMX4/ho::HphMX4, ura3::KanMX4/ura3::KanMX4, lys2::URA3/LYS2
3	E8	60x305	MAT a/α, ho::HphMX4/ho::HphMX4, ura3::KanMX4/ura3::KanMX4, lys2::URA3/LYS2
3	E9	61x259	MAT a/α, ho::HphMX4/ho::HphMX4, ura3::KanMX4/ura3::KanMX4, lys2::URA3/LYS2
3	E10	62x260	MAT a/α, ho::HphMX4/ho::HphMX4, ura3::KanMX4/ura3::KanMX4, lys2::URA3/LYS2
3	E11	55x215	MAT a/α, ho::HphMX4/ho::HphMX4, ura3::KanMX4/ura3::KanMX4, lys2::URA3/LYS2
3	E12	NAxNA (CC439)	MAT a/α, ho::HphMX4/ho::HphMX4, ura3::KanMX4/ura3::KanMX4, lys2::URA3/LYS2
3	F1	65x274	MAT a/α, ho::HphMX4/ho::HphMX4, ura3::KanMX4/ura3::KanMX4, lys2::URA3/LYS2
3	F2	66x275	MAT a/α, ho::HphMX4/ho::HphMX4, ura3::KanMX4/ura3::KanMX4, lys2::URA3/LYS2
3	F3	63x265	MAT a/α, ho::HphMX4/ho::HphMX4, ura3::KanMX4/ura3::KanMX4, lys2::URA3/LYS2
3	F4	68x266	MAT a/α, ho::HphMX4/ho::HphMX4, ura3::KanMX4/ura3::KanMX4, lys2::URA3/LYS2
3	F5	69x267	MAT a/α, ho::HphMX4/ho::HphMX4, ura3::KanMX4/ura3::KanMX4, lys2::URA3/LYS2
3	F6	70x268	MAT a/α, ho::HphMX4/ho::HphMX4, ura3::KanMX4/ura3::KanMX4, lys2::URA3/LYS2
3	F7	71x270	MAT a/α, ho::HphMX4/ho::HphMX4, ura3::KanMX4/ura3::KanMX4, lys2::URA3/LYS2
3	F8	72x271	MAT a/α, ho::HphMX4/ho::HphMX4, ura3::KanMX4/ura3::KanMX4, lys2::URA3/LYS2
3	F9	73x272	MAT a/α, ho::HphMX4/ho::HphMX4, ura3::KanMX4/ura3::KanMX4, lys2::URA3/LYS2
3	F10	74x273	MAT a/α, ho::HphMX4/ho::HphMX4, ura3::KanMX4/ura3::KanMX4, lys2::URA3/LYS2
3	F11	63x229	MAT a/α, ho::HphMX4/ho::HphMX4, ura3::KanMX4/ura3::KanMX4, lys2::URA3/LYS2
3	F12	NAxWA (CC429)	MAT a/α, ho::HphMX4/ho::HphMX4, ura3::KanMX4/ura3::KanMX4, lys2::URA3/LYS2
3	G1	77x287	MAT a/α, ho::HphMX4/ho::HphMX4, ura3::KanMX4/ura3::KanMX4, lys2::URA3/LYS2
3	G2	78x277	MAT a/α, ho::HphMX4/ho::HphMX4, ura3::KanMX4/ura3::KanMX4, lys2::URA3/LYS2
3	G3	75x211	MAT a/α, ho::HphMX4/ho::HphMX4, ura3::KanMX4/ura3::KanMX4, lys2::URA3/LYS2
3	G4	80x279	MAT a/α, ho::HphMX4/ho::HphMX4, ura3::KanMX4/ura3::KanMX4, lys2::URA3/LYS2
3	G5	81x280	MAT a/α, ho::HphMX4/ho::HphMX4, ura3::KanMX4/ura3::KanMX4, lys2::URA3/LYS2
3	G6	82x281	MAT a/α, ho::HphMX4/ho::HphMX4, ura3::KanMX4/ura3::KanMX4, lys2::URA3/LYS2
3	G7	83x282	MAT a/α, ho::HphMX4/ho::HphMX4, ura3::KanMX4/ura3::KanMX4, lys2::URA3/LYS2
3	G8	84x283	MAT a/α, ho::HphMX4/ho::HphMX4, ura3::KanMX4/ura3::KanMX4, lys2::URA3/LYS2
3	G9	85x284	MAT a/α, ho::HphMX4/ho::HphMX4, ura3::KanMX4/ura3::KanMX4, lys2::URA3/LYS2
3	G10	86x286	MAT a/α, ho::HphMX4/ho::HphMX4, ura3::KanMX4/ura3::KanMX4, lys2::URA3/LYS2
3	G11	75x243	MAT a/α, ho::HphMX4/ho::HphMX4, ura3::KanMX4/ura3::KanMX4, lys2::URA3/LYS2
3	G12	WAxWA (CC426)	MAT a/α, ho::HphMX4/ho::HphMX4, ura3::KanMX4/ura3::KanMX4, lys2::URA3/LYS2
3	H1	121x301	MAT a/α, ho::HphMX4/ho::HphMX4, ura3::KanMX4/ura3::KanMX4, lys2::URA3/LYS2
3	H2	122x304	MAT a/α, ho::HphMX4/ho::HphMX4, ura3::KanMX4/ura3::KanMX4, lys2::URA3/LYS2
3	H3	123x291	MAT a/α, ho::HphMX4/ho::HphMX4, ura3::KanMX4/ura3::KanMX4, lys2::URA3/LYS2
3	H4	124x292	MAT a/α, ho::HphMX4/ho::HphMX4, ura3::KanMX4/ura3::KanMX4, lys2::URA3/LYS2
3	H5	126x293	MAT a/α, ho::HphMX4/ho::HphMX4, ura3::KanMX4/ura3::KanMX4, lys2::URA3/LYS2
3	H6	127x295	MAT a/α, ho::HphMX4/ho::HphMX4, ura3::KanMX4/ura3::KanMX4, lys2::URA3/LYS2
3	H7	128x296	MAT a/α, ho::HphMX4/ho::HphMX4, ura3::KanMX4/ura3::KanMX4, lys2::URA3/LYS2
3	H8	129x297	MAT a/α, ho::HphMX4/ho::HphMX4, ura3::KanMX4/ura3::KanMX4, lys2::URA3/LYS2
3	H9	130x298	MAT a/α, ho::HphMX4/ho::HphMX4, ura3::KanMX4/ura3::KanMX4, lys2::URA3/LYS2
3	H10	131x300	MAT a/α, ho::HphMX4/ho::HphMX4, ura3::KanMX4/ura3::KanMX4, lys2::URA3/LYS2
3	H11	123x255	MAT a/α, ho::HphMX4/ho::HphMX4, ura3::KanMX4/ura3::KanMX4, lys2::URA3/LYS2
3	H12	NAxNA (CC440)	MAT a/α, ho::HphMX4/ho::HphMX4, ura3::KanMX4/ura3::KanMX4, lys2::URA3/LYS2
4	A1	1x208	MAT a/α, ho::HphMX4/ho::HphMX4, ura3::KanMX4/ura3::KanMX4, lys2::URA3/LYS2
4	A2	39x209	MAT a/α, ho::HphMX4/ho::HphMX4, ura3::KanMX4/ura3::KanMX4, lys2::URA3/LYS2
4	A3	3x210	MAT a/α, ho::HphMX4/ho::HphMX4, ura3::KanMX4/ura3::KanMX4, lys2::URA3/LYS2
4	A4	4x201	MAT a/α, ho::HphMX4/ho::HphMX4, ura3::KanMX4/ura3::KanMX4, lys2::URA3/LYS2
4	A5	5x237	MAT a/α, ho::HphMX4/ho::HphMX4, ura3::KanMX4/ura3::KanMX4, lys2::URA3/LYS2
4	A6	6x203	MAT a/α, ho::HphMX4/ho::HphMX4, ura3::KanMX4/ura3::KanMX4, lys2::URA3/LYS2
4	A7	7x204	MAT a/α, ho::HphMX4/ho::HphMX4, ura3::KanMX4/ura3::KanMX4, lys2::URA3/LYS2
4	A8	8x205	MAT a/α, ho::HphMX4/ho::HphMX4, ura3::KanMX4/ura3::KanMX4, lys2::URA3/LYS2
4	A9	9x289	MAT a/α, ho::HphMX4/ho::HphMX4, ura3::KanMX4/ura3::KanMX4, lys2::URA3/LYS2
4	A10	10x207	MAT a/α, ho::HphMX4/ho::HphMX4, ura3::KanMX4/ura3::KanMX4, lys2::URA3/LYS2
4	A11	4x268	MAT a/α, ho::HphMX4/ho::HphMX4, ura3::KanMX4/ura3::KanMX4, lys2::URA3/LYS2
4	A12	WAxWA (CC424)	MAT a/α, ho::HphMX4/ho::HphMX4, ura3::KanMX4/ura3::KanMX4, lys2::URA3/LYS2
4	B1	14x220	MAT a/α, ho::HphMX4/ho::HphMX4, ura3::KanMX4/ura3::KanMX4, lys2::URA3/LYS2
4	B2	15x221	MAT a/α, ho::HphMX4/ho::HphMX4, ura3::KanMX4/ura3::KanMX4, lys2::URA3/LYS2
4	B3	16x238	MAT a/α, ho::HphMX4/ho::HphMX4, ura3::KanMX4/ura3::KanMX4, lys2::URA3/LYS2
4	B4	17x213	MAT a/α, ho::HphMX4/ho::HphMX4, ura3::KanMX4/ura3::KanMX4, lys2::URA3/LYS2
4	B5	18x214	MAT a/α, ho::HphMX4/ho::HphMX4, ura3::KanMX4/ura3::KanMX4, lys2::URA3/LYS2
4	B6	19x215	MAT a/α, ho::HphMX4/ho::HphMX4, ura3::KanMX4/ura3::KanMX4, lys2::URA3/LYS2
4	B7	21x216	MAT a/α, ho::HphMX4/ho::HphMX4, ura3::KanMX4/ura3::KanMX4, lys2::URA3/LYS2
4	B8	22x217	MAT a/α, ho::HphMX4/ho::HphMX4, ura3::KanMX4/ura3::KanMX4, lys2::URA3/LYS2
4	B9	24x218	MAT a/α, ho::HphMX4/ho::HphMX4, ura3::KanMX4/ura3::KanMX4, lys2::URA3/LYS2
4	B10	25x219	MAT a/α, ho::HphMX4/ho::HphMX4, ura3::KanMX4/ura3::KanMX4, lys2::URA3/LYS2
4	B11	17x281	MAT a/α, ho::HphMX4/ho::HphMX4, ura3::KanMX4/ura3::KanMX4, lys2::URA3/LYS2
4	B12	NAxNA (CC438)	MAT a/α, ho::HphMX4/ho::HphMX4, ura3::KanMX4/ura3::KanMX4, lys2::URA3/LYS2
4	C1	28x212	MAT a/α, ho::HphMX4/ho::HphMX4, ura3::KanMX4/ura3::KanMX4, lys2::URA3/LYS2
4	C2	29x235	MAT a/α, ho::HphMX4/ho::HphMX4, ura3::KanMX4/ura3::KanMX4, lys2::URA3/LYS2
4	C3	30x236	MAT a/α, ho::HphMX4/ho::HphMX4, ura3::KanMX4/ura3::KanMX4, lys2::URA3/LYS2
4	C4	32x227	MAT a/α, ho::HphMX4/ho::HphMX4, ura3::KanMX4/ura3::KanMX4, lys2::URA3/LYS2
4	C5	33x228	MAT a/α, ho::HphMX4/ho::HphMX4, ura3::KanMX4/ura3::KanMX4, lys2::URA3/LYS2
4	C6	34x229	MAT a/α, ho::HphMX4/ho::HphMX4, ura3::KanMX4/ura3::KanMX4, lys2::URA3/LYS2
4	C7	35x263	MAT a/α, ho::HphMX4/ho::HphMX4, ura3::KanMX4/ura3::KanMX4, lys2::URA3/LYS2
4	C8	36x231	MAT a/α, ho::HphMX4/ho::HphMX4, ura3::KanMX4/ura3::KanMX4, lys2::URA3/LYS2
4	C9	37x232	MAT a/α, ho::HphMX4/ho::HphMX4, ura3::KanMX4/ura3::KanMX4, lys2::URA3/LYS2
4	C10	38x233	MAT a/α, ho::HphMX4/ho::HphMX4, ura3::KanMX4/ura3::KanMX4, lys2::URA3/LYS2
4	C11	32x295	MAT a/α, ho::HphMX4/ho::HphMX4, ura3::KanMX4/ura3::KanMX4, lys2::URA3/LYS2
4	C12	NAxWA (CC428)	MAT a/α, ho::HphMX4/ho::HphMX4, ura3::KanMX4/ura3::KanMX4, lys2::URA3/LYS2
4	D1	11x248	MAT a/α, ho::HphMX4/ho::HphMX4, ura3::KanMX4/ura3::KanMX4, lys2::URA3/LYS2
4	D2	42x224	MAT a/α, ho::HphMX4/ho::HphMX4, ura3::KanMX4/ura3::KanMX4, lys2::URA3/LYS2
4	D3	43x252	MAT a/α, ho::HphMX4/ho::HphMX4, ura3::KanMX4/ura3::KanMX4, lys2::URA3/LYS2
4	D4	44x239	MAT a/α, ho::HphMX4/ho::HphMX4, ura3::KanMX4/ura3::KanMX4, lys2::URA3/LYS2
4	D5	45x241	MAT a/α, ho::HphMX4/ho::HphMX4, ura3::KanMX4/ura3::KanMX4, lys2::URA3/LYS2
4	D6	46x243	MAT a/α, ho::HphMX4/ho::HphMX4, ura3::KanMX4/ura3::KanMX4, lys2::URA3/LYS2
4	D7	13x244	MAT a/α, ho::HphMX4/ho::HphMX4, ura3::KanMX4/ura3::KanMX4, lys2::URA3/LYS2
4	D8	27x245	MAT a/α, ho::HphMX4/ho::HphMX4, ura3::KanMX4/ura3::KanMX4, lys2::URA3/LYS2
4	D9	40x246	MAT a/α, ho::HphMX4/ho::HphMX4, ura3::KanMX4/ura3::KanMX4, lys2::URA3/LYS2
4	D10	52x247	MAT a/α, ho::HphMX4/ho::HphMX4, ura3::KanMX4/ura3::KanMX4, lys2::URA3/LYS2
4	D11	44x204	MAT a/α, ho::HphMX4/ho::HphMX4, ura3::KanMX4/ura3::KanMX4, lys2::URA3/LYS2
4	D12	WAxWA (CC425)	MAT a/α, ho::HphMX4/ho::HphMX4, ura3::KanMX4/ura3::KanMX4, lys2::URA3/LYS2
4	E1	26x260	MAT a/α, ho::HphMX4/ho::HphMX4, ura3::KanMX4/ura3::KanMX4, lys2::URA3/LYS2
4	E2	51x261	MAT a/α, ho::HphMX4/ho::HphMX4, ura3::KanMX4/ura3::KanMX4, lys2::URA3/LYS2
4	E3	55x262	MAT a/α, ho::HphMX4/ho::HphMX4, ura3::KanMX4/ura3::KanMX4, lys2::URA3/LYS2
4	E4	56x253	MAT a/α, ho::HphMX4/ho::HphMX4, ura3::KanMX4/ura3::KanMX4, lys2::URA3/LYS2
4	E5	57x251	MAT a/α, ho::HphMX4/ho::HphMX4, ura3::KanMX4/ura3::KanMX4, lys2::URA3/LYS2
4	E6	132x255	MAT a/α, ho::HphMX4/ho::HphMX4, ura3::KanMX4/ura3::KanMX4, lys2::URA3/LYS2
4	E7	59x276	MAT a/α, ho::HphMX4/ho::HphMX4, ura3::KanMX4/ura3::KanMX4, lys2::URA3/LYS2
4	E8	60x257	MAT a/α, ho::HphMX4/ho::HphMX4, ura3::KanMX4/ura3::KanMX4, lys2::URA3/LYS2
4	E9	61x305	MAT a/α, ho::HphMX4/ho::HphMX4, ura3::KanMX4/ura3::KanMX4, lys2::URA3/LYS2
4	E10	62x259	MAT a/α, ho::HphMX4/ho::HphMX4, ura3::KanMX4/ura3::KanMX4, lys2::URA3/LYS2
4	E11	56x216	MAT a/α, ho::HphMX4/ho::HphMX4, ura3::KanMX4/ura3::KanMX4, lys2::URA3/LYS2
4	E12	NAxNA (CC439)	MAT a/α, ho::HphMX4/ho::HphMX4, ura3::KanMX4/ura3::KanMX4, lys2::URA3/LYS2
4	F1	65x273	MAT a/α, ho::HphMX4/ho::HphMX4, ura3::KanMX4/ura3::KanMX4, lys2::URA3/LYS2
4	F2	66x274	MAT a/α, ho::HphMX4/ho::HphMX4, ura3::KanMX4/ura3::KanMX4, lys2::URA3/LYS2
4	F3	63x275	MAT a/α, ho::HphMX4/ho::HphMX4, ura3::KanMX4/ura3::KanMX4, lys2::URA3/LYS2
4	F4	68x265	MAT a/α, ho::HphMX4/ho::HphMX4, ura3::KanMX4/ura3::KanMX4, lys2::URA3/LYS2
4	F5	69x266	MAT a/α, ho::HphMX4/ho::HphMX4, ura3::KanMX4/ura3::KanMX4, lys2::URA3/LYS2
4	F6	70x267	MAT a/α, ho::HphMX4/ho::HphMX4, ura3::KanMX4/ura3::KanMX4, lys2::URA3/LYS2
4	F7	71x268	MAT a/α, ho::HphMX4/ho::HphMX4, ura3::KanMX4/ura3::KanMX4, lys2::URA3/LYS2
4	F8	72x270	MAT a/α, ho::HphMX4/ho::HphMX4, ura3::KanMX4/ura3::KanMX4, lys2::URA3/LYS2
4	F9	73x271	MAT a/α, ho::HphMX4/ho::HphMX4, ura3::KanMX4/ura3::KanMX4, lys2::URA3/LYS2
4	F10	74x272	MAT a/α, ho::HphMX4/ho::HphMX4, ura3::KanMX4/ura3::KanMX4, lys2::URA3/LYS2
4	F11	68x263	MAT a/α, ho::HphMX4/ho::HphMX4, ura3::KanMX4/ura3::KanMX4, lys2::URA3/LYS2
4	F12	NAxWA (CC429)	MAT a/α, ho::HphMX4/ho::HphMX4, ura3::KanMX4/ura3::KanMX4, lys2::URA3/LYS2
4	G1	77x286	MAT a/α, ho::HphMX4/ho::HphMX4, ura3::KanMX4/ura3::KanMX4, lys2::URA3/LYS2
4	G2	78x287	MAT a/α, ho::HphMX4/ho::HphMX4, ura3::KanMX4/ura3::KanMX4, lys2::URA3/LYS2
4	G3	75x277	MAT a/α, ho::HphMX4/ho::HphMX4, ura3::KanMX4/ura3::KanMX4, lys2::URA3/LYS2
4	G4	80x211	MAT a/α, ho::HphMX4/ho::HphMX4, ura3::KanMX4/ura3::KanMX4, lys2::URA3/LYS2
4	G5	81x279	MAT a/α, ho::HphMX4/ho::HphMX4, ura3::KanMX4/ura3::KanMX4, lys2::URA3/LYS2
4	G6	82x280	MAT a/α, ho::HphMX4/ho::HphMX4, ura3::KanMX4/ura3::KanMX4, lys2::URA3/LYS2
4	G7	83x281	MAT a/α, ho::HphMX4/ho::HphMX4, ura3::KanMX4/ura3::KanMX4, lys2::URA3/LYS2
4	G8	84x282	MAT a/α, ho::HphMX4/ho::HphMX4, ura3::KanMX4/ura3::KanMX4, lys2::URA3/LYS2
4	G9	85x283	MAT a/α, ho::HphMX4/ho::HphMX4, ura3::KanMX4/ura3::KanMX4, lys2::URA3/LYS2
4	G10	86x284	MAT a/α, ho::HphMX4/ho::HphMX4, ura3::KanMX4/ura3::KanMX4, lys2::URA3/LYS2
4	G11	80x244	MAT a/α, ho::HphMX4/ho::HphMX4, ura3::KanMX4/ura3::KanMX4, lys2::URA3/LYS2
4	G12	WAxWA (CC426)	MAT a/α, ho::HphMX4/ho::HphMX4, ura3::KanMX4/ura3::KanMX4, lys2::URA3/LYS2
4	H1	121x300	MAT a/α, ho::HphMX4/ho::HphMX4, ura3::KanMX4/ura3::KanMX4, lys2::URA3/LYS2
4	H2	122x301	MAT a/α, ho::HphMX4/ho::HphMX4, ura3::KanMX4/ura3::KanMX4, lys2::URA3/LYS2
4	H3	123x304	MAT a/α, ho::HphMX4/ho::HphMX4, ura3::KanMX4/ura3::KanMX4, lys2::URA3/LYS2
4	H4	124x291	MAT a/α, ho::HphMX4/ho::HphMX4, ura3::KanMX4/ura3::KanMX4, lys2::URA3/LYS2
4	H5	126x292	MAT a/α, ho::HphMX4/ho::HphMX4, ura3::KanMX4/ura3::KanMX4, lys2::URA3/LYS2
4	H6	127x293	MAT a/α, ho::HphMX4/ho::HphMX4, ura3::KanMX4/ura3::KanMX4, lys2::URA3/LYS2
4	H7	128x295	MAT a/α, ho::HphMX4/ho::HphMX4, ura3::KanMX4/ura3::KanMX4, lys2::URA3/LYS2
4	H8	129x296	MAT a/α, ho::HphMX4/ho::HphMX4, ura3::KanMX4/ura3::KanMX4, lys2::URA3/LYS2
4	H9	130x297	MAT a/α, ho::HphMX4/ho::HphMX4, ura3::KanMX4/ura3::KanMX4, lys2::URA3/LYS2
4	H10	131x298	MAT a/α, ho::HphMX4/ho::HphMX4, ura3::KanMX4/ura3::KanMX4, lys2::URA3/LYS2
4	H11	124x276	MAT a/α, ho::HphMX4/ho::HphMX4, ura3::KanMX4/ura3::KanMX4, lys2::URA3/LYS2
4	H12	NAxNA (CC440)	MAT a/α, ho::HphMX4/ho::HphMX4, ura3::KanMX4/ura3::KanMX4, lys2::URA3/LYS2
5	A1	1x207	MAT a/α, ho::HphMX4/ho::HphMX4, ura3::KanMX4/ura3::KanMX4, lys2::URA3/LYS2
5	A2	39x208	MAT a/α, ho::HphMX4/ho::HphMX4, ura3::KanMX4/ura3::KanMX4, lys2::URA3/LYS2
5	A3	3x209	MAT a/α, ho::HphMX4/ho::HphMX4, ura3::KanMX4/ura3::KanMX4, lys2::URA3/LYS2
5	A4	4x210	MAT a/α, ho::HphMX4/ho::HphMX4, ura3::KanMX4/ura3::KanMX4, lys2::URA3/LYS2
5	A5	5x201	MAT a/α, ho::HphMX4/ho::HphMX4, ura3::KanMX4/ura3::KanMX4, lys2::URA3/LYS2
5	A6	6x237	MAT a/α, ho::HphMX4/ho::HphMX4, ura3::KanMX4/ura3::KanMX4, lys2::URA3/LYS2
5	A7	7x203	MAT a/α, ho::HphMX4/ho::HphMX4, ura3::KanMX4/ura3::KanMX4, lys2::URA3/LYS2
5	A8	8x204	MAT a/α, ho::HphMX4/ho::HphMX4, ura3::KanMX4/ura3::KanMX4, lys2::URA3/LYS2
5	A9	9x205	MAT a/α, ho::HphMX4/ho::HphMX4, ura3::KanMX4/ura3::KanMX4, lys2::URA3/LYS2
5	A10	10x289	MAT a/α, ho::HphMX4/ho::HphMX4, ura3::KanMX4/ura3::KanMX4, lys2::URA3/LYS2
5	A11	5x270	MAT a/α, ho::HphMX4/ho::HphMX4, ura3::KanMX4/ura3::KanMX4, lys2::URA3/LYS2
5	A12	WAxWA (CC424)	MAT a/α, ho::HphMX4/ho::HphMX4, ura3::KanMX4/ura3::KanMX4, lys2::URA3/LYS2
5	B1	14x219	MAT a/α, ho::HphMX4/ho::HphMX4, ura3::KanMX4/ura3::KanMX4, lys2::URA3/LYS2
5	B2	15x220	MAT a/α, ho::HphMX4/ho::HphMX4, ura3::KanMX4/ura3::KanMX4, lys2::URA3/LYS2
5	B3	16x221	MAT a/α, ho::HphMX4/ho::HphMX4, ura3::KanMX4/ura3::KanMX4, lys2::URA3/LYS2
5	B4	17x238	MAT a/α, ho::HphMX4/ho::HphMX4, ura3::KanMX4/ura3::KanMX4, lys2::URA3/LYS2
5	B5	18x213	MAT a/α, ho::HphMX4/ho::HphMX4, ura3::KanMX4/ura3::KanMX4, lys2::URA3/LYS2
5	B6	19x214	MAT a/α, ho::HphMX4/ho::HphMX4, ura3::KanMX4/ura3::KanMX4, lys2::URA3/LYS2
5	B7	21x215	MAT a/α, ho::HphMX4/ho::HphMX4, ura3::KanMX4/ura3::KanMX4, lys2::URA3/LYS2
5	B8	22x216	MAT a/α, ho::HphMX4/ho::HphMX4, ura3::KanMX4/ura3::KanMX4, lys2::URA3/LYS2
5	B9	24x217	MAT a/α, ho::HphMX4/ho::HphMX4, ura3::KanMX4/ura3::KanMX4, lys2::URA3/LYS2
5	B10	25x218	MAT a/α, ho::HphMX4/ho::HphMX4, ura3::KanMX4/ura3::KanMX4, lys2::URA3/LYS2
5	B11	18x282	MAT a/α, ho::HphMX4/ho::HphMX4, ura3::KanMX4/ura3::KanMX4, lys2::URA3/LYS2
5	B12	NAxNA (CC438)	MAT a/α, ho::HphMX4/ho::HphMX4, ura3::KanMX4/ura3::KanMX4, lys2::URA3/LYS2
5	C1	28x233	MAT a/α, ho::HphMX4/ho::HphMX4, ura3::KanMX4/ura3::KanMX4, lys2::URA3/LYS2
5	C2	29x212	MAT a/α, ho::HphMX4/ho::HphMX4, ura3::KanMX4/ura3::KanMX4, lys2::URA3/LYS2
5	C3	30x235	MAT a/α, ho::HphMX4/ho::HphMX4, ura3::KanMX4/ura3::KanMX4, lys2::URA3/LYS2
5	C4	32x236	MAT a/α, ho::HphMX4/ho::HphMX4, ura3::KanMX4/ura3::KanMX4, lys2::URA3/LYS2
5	C5	33x227	MAT a/α, ho::HphMX4/ho::HphMX4, ura3::KanMX4/ura3::KanMX4, lys2::URA3/LYS2
5	C6	34x228	MAT a/α, ho::HphMX4/ho::HphMX4, ura3::KanMX4/ura3::KanMX4, lys2::URA3/LYS2
5	C7	35x229	MAT a/α, ho::HphMX4/ho::HphMX4, ura3::KanMX4/ura3::KanMX4, lys2::URA3/LYS2
5	C8	36x263	MAT a/α, ho::HphMX4/ho::HphMX4, ura3::KanMX4/ura3::KanMX4, lys2::URA3/LYS2
5	C9	37x231	MAT a/α, ho::HphMX4/ho::HphMX4, ura3::KanMX4/ura3::KanMX4, lys2::URA3/LYS2
5	C10	38x232	MAT a/α, ho::HphMX4/ho::HphMX4, ura3::KanMX4/ura3::KanMX4, lys2::URA3/LYS2
5	C11	33x296	MAT a/α, ho::HphMX4/ho::HphMX4, ura3::KanMX4/ura3::KanMX4, lys2::URA3/LYS2
5	C12	NAxWA (CC428)	MAT a/α, ho::HphMX4/ho::HphMX4, ura3::KanMX4/ura3::KanMX4, lys2::URA3/LYS2
5	D1	11x247	MAT a/α, ho::HphMX4/ho::HphMX4, ura3::KanMX4/ura3::KanMX4, lys2::URA3/LYS2
5	D2	42x248	MAT a/α, ho::HphMX4/ho::HphMX4, ura3::KanMX4/ura3::KanMX4, lys2::URA3/LYS2
5	D3	43x224	MAT a/α, ho::HphMX4/ho::HphMX4, ura3::KanMX4/ura3::KanMX4, lys2::URA3/LYS2
5	D4	44x252	MAT a/α, ho::HphMX4/ho::HphMX4, ura3::KanMX4/ura3::KanMX4, lys2::URA3/LYS2
5	D5	45x239	MAT a/α, ho::HphMX4/ho::HphMX4, ura3::KanMX4/ura3::KanMX4, lys2::URA3/LYS2
5	D6	46x241	MAT a/α, ho::HphMX4/ho::HphMX4, ura3::KanMX4/ura3::KanMX4, lys2::URA3/LYS2
5	D7	13x243	MAT a/α, ho::HphMX4/ho::HphMX4, ura3::KanMX4/ura3::KanMX4, lys2::URA3/LYS2
5	D8	27x244	MAT a/α, ho::HphMX4/ho::HphMX4, ura3::KanMX4/ura3::KanMX4, lys2::URA3/LYS2
5	D9	40x245	MAT a/α, ho::HphMX4/ho::HphMX4, ura3::KanMX4/ura3::KanMX4, lys2::URA3/LYS2
5	D10	52x246	MAT a/α, ho::HphMX4/ho::HphMX4, ura3::KanMX4/ura3::KanMX4, lys2::URA3/LYS2
5	D11	45x205	MAT a/α, ho::HphMX4/ho::HphMX4, ura3::KanMX4/ura3::KanMX4, lys2::URA3/LYS2
5	D12	WAxWA (CC425)	MAT a/α, ho::HphMX4/ho::HphMX4, ura3::KanMX4/ura3::KanMX4, lys2::URA3/LYS2
5	E1	26x259	MAT a/α, ho::HphMX4/ho::HphMX4, ura3::KanMX4/ura3::KanMX4, lys2::URA3/LYS2
5	E2	51x260	MAT a/α, ho::HphMX4/ho::HphMX4, ura3::KanMX4/ura3::KanMX4, lys2::URA3/LYS2
5	E3	55x261	MAT a/α, ho::HphMX4/ho::HphMX4, ura3::KanMX4/ura3::KanMX4, lys2::URA3/LYS2
5	E4	56x262	MAT a/α, ho::HphMX4/ho::HphMX4, ura3::KanMX4/ura3::KanMX4, lys2::URA3/LYS2
5	E5	57x253	MAT a/α, ho::HphMX4/ho::HphMX4, ura3::KanMX4/ura3::KanMX4, lys2::URA3/LYS2
5	E6	132x251	MAT a/α, ho::HphMX4/ho::HphMX4, ura3::KanMX4/ura3::KanMX4, lys2::URA3/LYS2
5	E7	59x255	MAT a/α, ho::HphMX4/ho::HphMX4, ura3::KanMX4/ura3::KanMX4, lys2::URA3/LYS2
5	E8	60x276	MAT a/α, ho::HphMX4/ho::HphMX4, ura3::KanMX4/ura3::KanMX4, lys2::URA3/LYS2
5	E9	61x257	MAT a/α, ho::HphMX4/ho::HphMX4, ura3::KanMX4/ura3::KanMX4, lys2::URA3/LYS2
5	E10	62x305	MAT a/α, ho::HphMX4/ho::HphMX4, ura3::KanMX4/ura3::KanMX4, lys2::URA3/LYS2
5	E11	57x217	MAT a/α, ho::HphMX4/ho::HphMX4, ura3::KanMX4/ura3::KanMX4, lys2::URA3/LYS2
5	E12	NAxNA (CC439)	MAT a/α, ho::HphMX4/ho::HphMX4, ura3::KanMX4/ura3::KanMX4, lys2::URA3/LYS2
5	F1	65x272	MAT a/α, ho::HphMX4/ho::HphMX4, ura3::KanMX4/ura3::KanMX4, lys2::URA3/LYS2
5	F2	66x273	MAT a/α, ho::HphMX4/ho::HphMX4, ura3::KanMX4/ura3::KanMX4, lys2::URA3/LYS2
5	F3	63x274	MAT a/α, ho::HphMX4/ho::HphMX4, ura3::KanMX4/ura3::KanMX4, lys2::URA3/LYS2
5	F4	68x275	MAT a/α, ho::HphMX4/ho::HphMX4, ura3::KanMX4/ura3::KanMX4, lys2::URA3/LYS2
5	F5	69x265	MAT a/α, ho::HphMX4/ho::HphMX4, ura3::KanMX4/ura3::KanMX4, lys2::URA3/LYS2
5	F6	70x266	MAT a/α, ho::HphMX4/ho::HphMX4, ura3::KanMX4/ura3::KanMX4, lys2::URA3/LYS2
5	F7	71x267	MAT a/α, ho::HphMX4/ho::HphMX4, ura3::KanMX4/ura3::KanMX4, lys2::URA3/LYS2
5	F8	72x268	MAT a/α, ho::HphMX4/ho::HphMX4, ura3::KanMX4/ura3::KanMX4, lys2::URA3/LYS2
5	F9	73x270	MAT a/α, ho::HphMX4/ho::HphMX4, ura3::KanMX4/ura3::KanMX4, lys2::URA3/LYS2
5	F10	74x271	MAT a/α, ho::HphMX4/ho::HphMX4, ura3::KanMX4/ura3::KanMX4, lys2::URA3/LYS2
5	F11	69x231	MAT a/α, ho::HphMX4/ho::HphMX4, ura3::KanMX4/ura3::KanMX4, lys2::URA3/LYS2
5	F12	NAxWA (CC429)	MAT a/α, ho::HphMX4/ho::HphMX4, ura3::KanMX4/ura3::KanMX4, lys2::URA3/LYS2
5	G1	77x284	MAT a/α, ho::HphMX4/ho::HphMX4, ura3::KanMX4/ura3::KanMX4, lys2::URA3/LYS2
5	G2	78x286	MAT a/α, ho::HphMX4/ho::HphMX4, ura3::KanMX4/ura3::KanMX4, lys2::URA3/LYS2
5	G3	75x287	MAT a/α, ho::HphMX4/ho::HphMX4, ura3::KanMX4/ura3::KanMX4, lys2::URA3/LYS2
5	G4	80x277	MAT a/α, ho::HphMX4/ho::HphMX4, ura3::KanMX4/ura3::KanMX4, lys2::URA3/LYS2
5	G5	81x211	MAT a/α, ho::HphMX4/ho::HphMX4, ura3::KanMX4/ura3::KanMX4, lys2::URA3/LYS2
5	G6	82x279	MAT a/α, ho::HphMX4/ho::HphMX4, ura3::KanMX4/ura3::KanMX4, lys2::URA3/LYS2
5	G7	83x280	MAT a/α, ho::HphMX4/ho::HphMX4, ura3::KanMX4/ura3::KanMX4, lys2::URA3/LYS2
5	G8	84x281	MAT a/α, ho::HphMX4/ho::HphMX4, ura3::KanMX4/ura3::KanMX4, lys2::URA3/LYS2
5	G9	85x282	MAT a/α, ho::HphMX4/ho::HphMX4, ura3::KanMX4/ura3::KanMX4, lys2::URA3/LYS2
5	G10	86x283	MAT a/α, ho::HphMX4/ho::HphMX4, ura3::KanMX4/ura3::KanMX4, lys2::URA3/LYS2
5	G11	81x245	MAT a/α, ho::HphMX4/ho::HphMX4, ura3::KanMX4/ura3::KanMX4, lys2::URA3/LYS2
5	G12	WAxWA (CC426)	MAT a/α, ho::HphMX4/ho::HphMX4, ura3::KanMX4/ura3::KanMX4, lys2::URA3/LYS2
5	H1	121x298	MAT a/α, ho::HphMX4/ho::HphMX4, ura3::KanMX4/ura3::KanMX4, lys2::URA3/LYS2
5	H2	122x300	MAT a/α, ho::HphMX4/ho::HphMX4, ura3::KanMX4/ura3::KanMX4, lys2::URA3/LYS2
5	H3	123x301	MAT a/α, ho::HphMX4/ho::HphMX4, ura3::KanMX4/ura3::KanMX4, lys2::URA3/LYS2
5	H4	124x304	MAT a/α, ho::HphMX4/ho::HphMX4, ura3::KanMX4/ura3::KanMX4, lys2::URA3/LYS2
5	H5	126x291	MAT a/α, ho::HphMX4/ho::HphMX4, ura3::KanMX4/ura3::KanMX4, lys2::URA3/LYS2
5	H6	127x292	MAT a/α, ho::HphMX4/ho::HphMX4, ura3::KanMX4/ura3::KanMX4, lys2::URA3/LYS2
5	H7	128x293	MAT a/α, ho::HphMX4/ho::HphMX4, ura3::KanMX4/ura3::KanMX4, lys2::URA3/LYS2
5	H8	129x295	MAT a/α, ho::HphMX4/ho::HphMX4, ura3::KanMX4/ura3::KanMX4, lys2::URA3/LYS2
5	H9	130x296	MAT a/α, ho::HphMX4/ho::HphMX4, ura3::KanMX4/ura3::KanMX4, lys2::URA3/LYS2
5	H10	131x297	MAT a/α, ho::HphMX4/ho::HphMX4, ura3::KanMX4/ura3::KanMX4, lys2::URA3/LYS2
5	H11	126x257	MAT a/α, ho::HphMX4/ho::HphMX4, ura3::KanMX4/ura3::KanMX4, lys2::URA3/LYS2
5	H12	NAxNA (CC440)	MAT a/α, ho::HphMX4/ho::HphMX4, ura3::KanMX4/ura3::KanMX4, lys2::URA3/LYS2
6	A1	1x289	MAT a/α, ho::HphMX4/ho::HphMX4, ura3::KanMX4/ura3::KanMX4, lys2::URA3/LYS2
6	A2	39x207	MAT a/α, ho::HphMX4/ho::HphMX4, ura3::KanMX4/ura3::KanMX4, lys2::URA3/LYS2
6	A3	3x208	MAT a/α, ho::HphMX4/ho::HphMX4, ura3::KanMX4/ura3::KanMX4, lys2::URA3/LYS2
6	A4	4x209	MAT a/α, ho::HphMX4/ho::HphMX4, ura3::KanMX4/ura3::KanMX4, lys2::URA3/LYS2
6	A5	5x210	MAT a/α, ho::HphMX4/ho::HphMX4, ura3::KanMX4/ura3::KanMX4, lys2::URA3/LYS2
6	A6	6x201	MAT a/α, ho::HphMX4/ho::HphMX4, ura3::KanMX4/ura3::KanMX4, lys2::URA3/LYS2
6	A7	7x237	MAT a/α, ho::HphMX4/ho::HphMX4, ura3::KanMX4/ura3::KanMX4, lys2::URA3/LYS2
6	A8	8x203	MAT a/α, ho::HphMX4/ho::HphMX4, ura3::KanMX4/ura3::KanMX4, lys2::URA3/LYS2
6	A9	9x204	MAT a/α, ho::HphMX4/ho::HphMX4, ura3::KanMX4/ura3::KanMX4, lys2::URA3/LYS2
6	A10	10x205	MAT a/α, ho::HphMX4/ho::HphMX4, ura3::KanMX4/ura3::KanMX4, lys2::URA3/LYS2
6	A11	6x271	MAT a/α, ho::HphMX4/ho::HphMX4, ura3::KanMX4/ura3::KanMX4, lys2::URA3/LYS2
6	A12	WAxWA (CC424)	MAT a/α, ho::HphMX4/ho::HphMX4, ura3::KanMX4/ura3::KanMX4, lys2::URA3/LYS2
6	B1	14x218	MAT a/α, ho::HphMX4/ho::HphMX4, ura3::KanMX4/ura3::KanMX4, lys2::URA3/LYS2
6	B2	15x219	MAT a/α, ho::HphMX4/ho::HphMX4, ura3::KanMX4/ura3::KanMX4, lys2::URA3/LYS2
6	B3	16x220	MAT a/α, ho::HphMX4/ho::HphMX4, ura3::KanMX4/ura3::KanMX4, lys2::URA3/LYS2
6	B4	17x221	MAT a/α, ho::HphMX4/ho::HphMX4, ura3::KanMX4/ura3::KanMX4, lys2::URA3/LYS2
6	B5	18x238	MAT a/α, ho::HphMX4/ho::HphMX4, ura3::KanMX4/ura3::KanMX4, lys2::URA3/LYS2
6	B6	19x213	MAT a/α, ho::HphMX4/ho::HphMX4, ura3::KanMX4/ura3::KanMX4, lys2::URA3/LYS2
6	B7	21x214	MAT a/α, ho::HphMX4/ho::HphMX4, ura3::KanMX4/ura3::KanMX4, lys2::URA3/LYS2
6	B8	22x215	MAT a/α, ho::HphMX4/ho::HphMX4, ura3::KanMX4/ura3::KanMX4, lys2::URA3/LYS2
6	B9	24x216	MAT a/α, ho::HphMX4/ho::HphMX4, ura3::KanMX4/ura3::KanMX4, lys2::URA3/LYS2
6	B10	25x217	MAT a/α, ho::HphMX4/ho::HphMX4, ura3::KanMX4/ura3::KanMX4, lys2::URA3/LYS2
6	B11	19x283	MAT a/α, ho::HphMX4/ho::HphMX4, ura3::KanMX4/ura3::KanMX4, lys2::URA3/LYS2
6	B12	NAxNA (CC438)	MAT a/α, ho::HphMX4/ho::HphMX4, ura3::KanMX4/ura3::KanMX4, lys2::URA3/LYS2
6	C1	28x232	MAT a/α, ho::HphMX4/ho::HphMX4, ura3::KanMX4/ura3::KanMX4, lys2::URA3/LYS2
6	C2	29x233	MAT a/α, ho::HphMX4/ho::HphMX4, ura3::KanMX4/ura3::KanMX4, lys2::URA3/LYS2
6	C3	30x212	MAT a/α, ho::HphMX4/ho::HphMX4, ura3::KanMX4/ura3::KanMX4, lys2::URA3/LYS2
6	C4	32x235	MAT a/α, ho::HphMX4/ho::HphMX4, ura3::KanMX4/ura3::KanMX4, lys2::URA3/LYS2
6	C5	33x236	MAT a/α, ho::HphMX4/ho::HphMX4, ura3::KanMX4/ura3::KanMX4, lys2::URA3/LYS2
6	C6	34x227	MAT a/α, ho::HphMX4/ho::HphMX4, ura3::KanMX4/ura3::KanMX4, lys2::URA3/LYS2
6	C7	35x228	MAT a/α, ho::HphMX4/ho::HphMX4, ura3::KanMX4/ura3::KanMX4, lys2::URA3/LYS2
6	C8	36x229	MAT a/α, ho::HphMX4/ho::HphMX4, ura3::KanMX4/ura3::KanMX4, lys2::URA3/LYS2
6	C9	37x263	MAT a/α, ho::HphMX4/ho::HphMX4, ura3::KanMX4/ura3::KanMX4, lys2::URA3/LYS2
6	C10	38x231	MAT a/α, ho::HphMX4/ho::HphMX4, ura3::KanMX4/ura3::KanMX4, lys2::URA3/LYS2
6	C11	34x297	MAT a/α, ho::HphMX4/ho::HphMX4, ura3::KanMX4/ura3::KanMX4, lys2::URA3/LYS2
6	C12	NAxWA (CC428)	MAT a/α, ho::HphMX4/ho::HphMX4, ura3::KanMX4/ura3::KanMX4, lys2::URA3/LYS2
6	D1	11x246	MAT a/α, ho::HphMX4/ho::HphMX4, ura3::KanMX4/ura3::KanMX4, lys2::URA3/LYS2
6	D2	42x247	MAT a/α, ho::HphMX4/ho::HphMX4, ura3::KanMX4/ura3::KanMX4, lys2::URA3/LYS2
6	D3	43x248	MAT a/α, ho::HphMX4/ho::HphMX4, ura3::KanMX4/ura3::KanMX4, lys2::URA3/LYS2
6	D4	44x224	MAT a/α, ho::HphMX4/ho::HphMX4, ura3::KanMX4/ura3::KanMX4, lys2::URA3/LYS2
6	D5	45x252	MAT a/α, ho::HphMX4/ho::HphMX4, ura3::KanMX4/ura3::KanMX4, lys2::URA3/LYS2
6	D6	46x239	MAT a/α, ho::HphMX4/ho::HphMX4, ura3::KanMX4/ura3::KanMX4, lys2::URA3/LYS2
6	D7	13x241	MAT a/α, ho::HphMX4/ho::HphMX4, ura3::KanMX4/ura3::KanMX4, lys2::URA3/LYS2
6	D8	27x243	MAT a/α, ho::HphMX4/ho::HphMX4, ura3::KanMX4/ura3::KanMX4, lys2::URA3/LYS2
6	D9	40x244	MAT a/α, ho::HphMX4/ho::HphMX4, ura3::KanMX4/ura3::KanMX4, lys2::URA3/LYS2
6	D10	52x245	MAT a/α, ho::HphMX4/ho::HphMX4, ura3::KanMX4/ura3::KanMX4, lys2::URA3/LYS2
6	D11	46x289	MAT a/α, ho::HphMX4/ho::HphMX4, ura3::KanMX4/ura3::KanMX4, lys2::URA3/LYS2
6	D12	WAxWA (CC425)	MAT a/α, ho::HphMX4/ho::HphMX4, ura3::KanMX4/ura3::KanMX4, lys2::URA3/LYS2
6	E1	26x305	MAT a/α, ho::HphMX4/ho::HphMX4, ura3::KanMX4/ura3::KanMX4, lys2::URA3/LYS2
6	E2	51x259	MAT a/α, ho::HphMX4/ho::HphMX4, ura3::KanMX4/ura3::KanMX4, lys2::URA3/LYS2
6	E3	55x260	MAT a/α, ho::HphMX4/ho::HphMX4, ura3::KanMX4/ura3::KanMX4, lys2::URA3/LYS2
6	E4	56x261	MAT a/α, ho::HphMX4/ho::HphMX4, ura3::KanMX4/ura3::KanMX4, lys2::URA3/LYS2
6	E5	57x262	MAT a/α, ho::HphMX4/ho::HphMX4, ura3::KanMX4/ura3::KanMX4, lys2::URA3/LYS2
6	E6	132x253	MAT a/α, ho::HphMX4/ho::HphMX4, ura3::KanMX4/ura3::KanMX4, lys2::URA3/LYS2
6	E7	59x251	MAT a/α, ho::HphMX4/ho::HphMX4, ura3::KanMX4/ura3::KanMX4, lys2::URA3/LYS2
6	E8	60x255	MAT a/α, ho::HphMX4/ho::HphMX4, ura3::KanMX4/ura3::KanMX4, lys2::URA3/LYS2
6	E9	61x276	MAT a/α, ho::HphMX4/ho::HphMX4, ura3::KanMX4/ura3::KanMX4, lys2::URA3/LYS2
6	E10	62x257	MAT a/α, ho::HphMX4/ho::HphMX4, ura3::KanMX4/ura3::KanMX4, lys2::URA3/LYS2
6	E11	132x218	MAT a/α, ho::HphMX4/ho::HphMX4, ura3::KanMX4/ura3::KanMX4, lys2::URA3/LYS2
6	E12	NAxNA (CC439)	MAT a/α, ho::HphMX4/ho::HphMX4, ura3::KanMX4/ura3::KanMX4, lys2::URA3/LYS2
6	F1	65x271	MAT a/α, ho::HphMX4/ho::HphMX4, ura3::KanMX4/ura3::KanMX4, lys2::URA3/LYS2
6	F2	66x272	MAT a/α, ho::HphMX4/ho::HphMX4, ura3::KanMX4/ura3::KanMX4, lys2::URA3/LYS2
6	F3	63x273	MAT a/α, ho::HphMX4/ho::HphMX4, ura3::KanMX4/ura3::KanMX4, lys2::URA3/LYS2
6	F4	68x274	MAT a/α, ho::HphMX4/ho::HphMX4, ura3::KanMX4/ura3::KanMX4, lys2::URA3/LYS2
6	F5	69x275	MAT a/α, ho::HphMX4/ho::HphMX4, ura3::KanMX4/ura3::KanMX4, lys2::URA3/LYS2
6	F6	70x265	MAT a/α, ho::HphMX4/ho::HphMX4, ura3::KanMX4/ura3::KanMX4, lys2::URA3/LYS2
6	F7	71x266	MAT a/α, ho::HphMX4/ho::HphMX4, ura3::KanMX4/ura3::KanMX4, lys2::URA3/LYS2
6	F8	72x267	MAT a/α, ho::HphMX4/ho::HphMX4, ura3::KanMX4/ura3::KanMX4, lys2::URA3/LYS2
6	F9	73x268	MAT a/α, ho::HphMX4/ho::HphMX4, ura3::KanMX4/ura3::KanMX4, lys2::URA3/LYS2
6	F10	74x270	MAT a/α, ho::HphMX4/ho::HphMX4, ura3::KanMX4/ura3::KanMX4, lys2::URA3/LYS2
6	F11	70x232	MAT a/α, ho::HphMX4/ho::HphMX4, ura3::KanMX4/ura3::KanMX4, lys2::URA3/LYS2
6	F12	NAxWA (CC429)	MAT a/α, ho::HphMX4/ho::HphMX4, ura3::KanMX4/ura3::KanMX4, lys2::URA3/LYS2
6	G1	77x283	MAT a/α, ho::HphMX4/ho::HphMX4, ura3::KanMX4/ura3::KanMX4, lys2::URA3/LYS2
6	G2	78x284	MAT a/α, ho::HphMX4/ho::HphMX4, ura3::KanMX4/ura3::KanMX4, lys2::URA3/LYS2
6	G3	75x286	MAT a/α, ho::HphMX4/ho::HphMX4, ura3::KanMX4/ura3::KanMX4, lys2::URA3/LYS2
6	G4	80x287	MAT a/α, ho::HphMX4/ho::HphMX4, ura3::KanMX4/ura3::KanMX4, lys2::URA3/LYS2
6	G5	81x277	MAT a/α, ho::HphMX4/ho::HphMX4, ura3::KanMX4/ura3::KanMX4, lys2::URA3/LYS2
6	G6	82x211	MAT a/α, ho::HphMX4/ho::HphMX4, ura3::KanMX4/ura3::KanMX4, lys2::URA3/LYS2
6	G7	83x279	MAT a/α, ho::HphMX4/ho::HphMX4, ura3::KanMX4/ura3::KanMX4, lys2::URA3/LYS2
6	G8	84x280	MAT a/α, ho::HphMX4/ho::HphMX4, ura3::KanMX4/ura3::KanMX4, lys2::URA3/LYS2
6	G9	85x281	MAT a/α, ho::HphMX4/ho::HphMX4, ura3::KanMX4/ura3::KanMX4, lys2::URA3/LYS2
6	G10	86x282	MAT a/α, ho::HphMX4/ho::HphMX4, ura3::KanMX4/ura3::KanMX4, lys2::URA3/LYS2
6	G11	82x246	MAT a/α, ho::HphMX4/ho::HphMX4, ura3::KanMX4/ura3::KanMX4, lys2::URA3/LYS2
6	G12	WAxWA (CC426)	MAT a/α, ho::HphMX4/ho::HphMX4, ura3::KanMX4/ura3::KanMX4, lys2::URA3/LYS2
6	H1	121x297	MAT a/α, ho::HphMX4/ho::HphMX4, ura3::KanMX4/ura3::KanMX4, lys2::URA3/LYS2
6	H2	122x298	MAT a/α, ho::HphMX4/ho::HphMX4, ura3::KanMX4/ura3::KanMX4, lys2::URA3/LYS2
6	H3	123x300	MAT a/α, ho::HphMX4/ho::HphMX4, ura3::KanMX4/ura3::KanMX4, lys2::URA3/LYS2
6	H4	124x301	MAT a/α, ho::HphMX4/ho::HphMX4, ura3::KanMX4/ura3::KanMX4, lys2::URA3/LYS2
6	H5	126x304	MAT a/α, ho::HphMX4/ho::HphMX4, ura3::KanMX4/ura3::KanMX4, lys2::URA3/LYS2
6	H6	127x291	MAT a/α, ho::HphMX4/ho::HphMX4, ura3::KanMX4/ura3::KanMX4, lys2::URA3/LYS2
6	H7	128x292	MAT a/α, ho::HphMX4/ho::HphMX4, ura3::KanMX4/ura3::KanMX4, lys2::URA3/LYS2
6	H8	129x293	MAT a/α, ho::HphMX4/ho::HphMX4, ura3::KanMX4/ura3::KanMX4, lys2::URA3/LYS2
6	H9	130x295	MAT a/α, ho::HphMX4/ho::HphMX4, ura3::KanMX4/ura3::KanMX4, lys2::URA3/LYS2
6	H10	131x296	MAT a/α, ho::HphMX4/ho::HphMX4, ura3::KanMX4/ura3::KanMX4, lys2::URA3/LYS2
6	H11	127x305	MAT a/α, ho::HphMX4/ho::HphMX4, ura3::KanMX4/ura3::KanMX4, lys2::URA3/LYS2
6	H12	NAxNA (CC440)	MAT a/α, ho::HphMX4/ho::HphMX4, ura3::KanMX4/ura3::KanMX4, lys2::URA3/LYS2
7	A1	1x205	MAT a/α, ho::HphMX4/ho::HphMX4, ura3::KanMX4/ura3::KanMX4, lys2::URA3/LYS2
7	A2	39x289	MAT a/α, ho::HphMX4/ho::HphMX4, ura3::KanMX4/ura3::KanMX4, lys2::URA3/LYS2
7	A3	3x207	MAT a/α, ho::HphMX4/ho::HphMX4, ura3::KanMX4/ura3::KanMX4, lys2::URA3/LYS2
7	A4	4x208	MAT a/α, ho::HphMX4/ho::HphMX4, ura3::KanMX4/ura3::KanMX4, lys2::URA3/LYS2
7	A5	5x209	MAT a/α, ho::HphMX4/ho::HphMX4, ura3::KanMX4/ura3::KanMX4, lys2::URA3/LYS2
7	A6	6x210	MAT a/α, ho::HphMX4/ho::HphMX4, ura3::KanMX4/ura3::KanMX4, lys2::URA3/LYS2
7	A7	7x201	MAT a/α, ho::HphMX4/ho::HphMX4, ura3::KanMX4/ura3::KanMX4, lys2::URA3/LYS2
7	A8	8x237	MAT a/α, ho::HphMX4/ho::HphMX4, ura3::KanMX4/ura3::KanMX4, lys2::URA3/LYS2
7	A9	9x203	MAT a/α, ho::HphMX4/ho::HphMX4, ura3::KanMX4/ura3::KanMX4, lys2::URA3/LYS2
7	A10	10x204	MAT a/α, ho::HphMX4/ho::HphMX4, ura3::KanMX4/ura3::KanMX4, lys2::URA3/LYS2
7	A11	7x272	MAT a/α, ho::HphMX4/ho::HphMX4, ura3::KanMX4/ura3::KanMX4, lys2::URA3/LYS2
7	A12	WAxWA (CC424)	MAT a/α, ho::HphMX4/ho::HphMX4, ura3::KanMX4/ura3::KanMX4, lys2::URA3/LYS2
7	B1	14x217	MAT a/α, ho::HphMX4/ho::HphMX4, ura3::KanMX4/ura3::KanMX4, lys2::URA3/LYS2
7	B2	15x218	MAT a/α, ho::HphMX4/ho::HphMX4, ura3::KanMX4/ura3::KanMX4, lys2::URA3/LYS2
7	B3	16x219	MAT a/α, ho::HphMX4/ho::HphMX4, ura3::KanMX4/ura3::KanMX4, lys2::URA3/LYS2
7	B4	17x220	MAT a/α, ho::HphMX4/ho::HphMX4, ura3::KanMX4/ura3::KanMX4, lys2::URA3/LYS2
7	B5	18x221	MAT a/α, ho::HphMX4/ho::HphMX4, ura3::KanMX4/ura3::KanMX4, lys2::URA3/LYS2
7	B6	19x238	MAT a/α, ho::HphMX4/ho::HphMX4, ura3::KanMX4/ura3::KanMX4, lys2::URA3/LYS2
7	B7	21x213	MAT a/α, ho::HphMX4/ho::HphMX4, ura3::KanMX4/ura3::KanMX4, lys2::URA3/LYS2
7	B8	22x214	MAT a/α, ho::HphMX4/ho::HphMX4, ura3::KanMX4/ura3::KanMX4, lys2::URA3/LYS2
7	B9	24x215	MAT a/α, ho::HphMX4/ho::HphMX4, ura3::KanMX4/ura3::KanMX4, lys2::URA3/LYS2
7	B10	25x216	MAT a/α, ho::HphMX4/ho::HphMX4, ura3::KanMX4/ura3::KanMX4, lys2::URA3/LYS2
7	B11	21x284	MAT a/α, ho::HphMX4/ho::HphMX4, ura3::KanMX4/ura3::KanMX4, lys2::URA3/LYS2
7	B12	NAxNA (CC438)	MAT a/α, ho::HphMX4/ho::HphMX4, ura3::KanMX4/ura3::KanMX4, lys2::URA3/LYS2
7	C1	28x231	MAT a/α, ho::HphMX4/ho::HphMX4, ura3::KanMX4/ura3::KanMX4, lys2::URA3/LYS2
7	C2	29x232	MAT a/α, ho::HphMX4/ho::HphMX4, ura3::KanMX4/ura3::KanMX4, lys2::URA3/LYS2
7	C3	30x233	MAT a/α, ho::HphMX4/ho::HphMX4, ura3::KanMX4/ura3::KanMX4, lys2::URA3/LYS2
7	C4	32x212	MAT a/α, ho::HphMX4/ho::HphMX4, ura3::KanMX4/ura3::KanMX4, lys2::URA3/LYS2
7	C5	33x235	MAT a/α, ho::HphMX4/ho::HphMX4, ura3::KanMX4/ura3::KanMX4, lys2::URA3/LYS2
7	C6	34x236	MAT a/α, ho::HphMX4/ho::HphMX4, ura3::KanMX4/ura3::KanMX4, lys2::URA3/LYS2
7	C7	35x227	MAT a/α, ho::HphMX4/ho::HphMX4, ura3::KanMX4/ura3::KanMX4, lys2::URA3/LYS2
7	C8	36x228	MAT a/α, ho::HphMX4/ho::HphMX4, ura3::KanMX4/ura3::KanMX4, lys2::URA3/LYS2
7	C9	37x229	MAT a/α, ho::HphMX4/ho::HphMX4, ura3::KanMX4/ura3::KanMX4, lys2::URA3/LYS2
7	C10	38x263	MAT a/α, ho::HphMX4/ho::HphMX4, ura3::KanMX4/ura3::KanMX4, lys2::URA3/LYS2
7	C11	35x298	MAT a/α, ho::HphMX4/ho::HphMX4, ura3::KanMX4/ura3::KanMX4, lys2::URA3/LYS2
7	C12	NAxWA (CC428)	MAT a/α, ho::HphMX4/ho::HphMX4, ura3::KanMX4/ura3::KanMX4, lys2::URA3/LYS2
7	D1	11x245	MAT a/α, ho::HphMX4/ho::HphMX4, ura3::KanMX4/ura3::KanMX4, lys2::URA3/LYS2
7	D2	42x246	MAT a/α, ho::HphMX4/ho::HphMX4, ura3::KanMX4/ura3::KanMX4, lys2::URA3/LYS2
7	D3	43x247	MAT a/α, ho::HphMX4/ho::HphMX4, ura3::KanMX4/ura3::KanMX4, lys2::URA3/LYS2
7	D4	44x248	MAT a/α, ho::HphMX4/ho::HphMX4, ura3::KanMX4/ura3::KanMX4, lys2::URA3/LYS2
7	D5	45x224	MAT a/α, ho::HphMX4/ho::HphMX4, ura3::KanMX4/ura3::KanMX4, lys2::URA3/LYS2
7	D6	46x252	MAT a/α, ho::HphMX4/ho::HphMX4, ura3::KanMX4/ura3::KanMX4, lys2::URA3/LYS2
7	D7	13x239	MAT a/α, ho::HphMX4/ho::HphMX4, ura3::KanMX4/ura3::KanMX4, lys2::URA3/LYS2
7	D8	27x241	MAT a/α, ho::HphMX4/ho::HphMX4, ura3::KanMX4/ura3::KanMX4, lys2::URA3/LYS2
7	D9	40x243	MAT a/α, ho::HphMX4/ho::HphMX4, ura3::KanMX4/ura3::KanMX4, lys2::URA3/LYS2
7	D10	52x244	MAT a/α, ho::HphMX4/ho::HphMX4, ura3::KanMX4/ura3::KanMX4, lys2::URA3/LYS2
7	D11	13x207	MAT a/α, ho::HphMX4/ho::HphMX4, ura3::KanMX4/ura3::KanMX4, lys2::URA3/LYS2
7	D12	WAxWA (CC425)	MAT a/α, ho::HphMX4/ho::HphMX4, ura3::KanMX4/ura3::KanMX4, lys2::URA3/LYS2
7	E1	26x257	MAT a/α, ho::HphMX4/ho::HphMX4, ura3::KanMX4/ura3::KanMX4, lys2::URA3/LYS2
7	E2	51x305	MAT a/α, ho::HphMX4/ho::HphMX4, ura3::KanMX4/ura3::KanMX4, lys2::URA3/LYS2
7	E3	55x259	MAT a/α, ho::HphMX4/ho::HphMX4, ura3::KanMX4/ura3::KanMX4, lys2::URA3/LYS2
7	E4	56x260	MAT a/α, ho::HphMX4/ho::HphMX4, ura3::KanMX4/ura3::KanMX4, lys2::URA3/LYS2
7	E5	57x261	MAT a/α, ho::HphMX4/ho::HphMX4, ura3::KanMX4/ura3::KanMX4, lys2::URA3/LYS2
7	E6	132x262	MAT a/α, ho::HphMX4/ho::HphMX4, ura3::KanMX4/ura3::KanMX4, lys2::URA3/LYS2
7	E7	59x253	MAT a/α, ho::HphMX4/ho::HphMX4, ura3::KanMX4/ura3::KanMX4, lys2::URA3/LYS2
7	E8	60x251	MAT a/α, ho::HphMX4/ho::HphMX4, ura3::KanMX4/ura3::KanMX4, lys2::URA3/LYS2
7	E9	61x255	MAT a/α, ho::HphMX4/ho::HphMX4, ura3::KanMX4/ura3::KanMX4, lys2::URA3/LYS2
7	E10	62x276	MAT a/α, ho::HphMX4/ho::HphMX4, ura3::KanMX4/ura3::KanMX4, lys2::URA3/LYS2
7	E11	59x219	MAT a/α, ho::HphMX4/ho::HphMX4, ura3::KanMX4/ura3::KanMX4, lys2::URA3/LYS2
7	E12	NAxNA (CC439)	MAT a/α, ho::HphMX4/ho::HphMX4, ura3::KanMX4/ura3::KanMX4, lys2::URA3/LYS2
7	F1	65x270	MAT a/α, ho::HphMX4/ho::HphMX4, ura3::KanMX4/ura3::KanMX4, lys2::URA3/LYS2
7	F2	66x271	MAT a/α, ho::HphMX4/ho::HphMX4, ura3::KanMX4/ura3::KanMX4, lys2::URA3/LYS2
7	F3	63x272	MAT a/α, ho::HphMX4/ho::HphMX4, ura3::KanMX4/ura3::KanMX4, lys2::URA3/LYS2
7	F4	68x273	MAT a/α, ho::HphMX4/ho::HphMX4, ura3::KanMX4/ura3::KanMX4, lys2::URA3/LYS2
7	F5	69x274	MAT a/α, ho::HphMX4/ho::HphMX4, ura3::KanMX4/ura3::KanMX4, lys2::URA3/LYS2
7	F6	70x275	MAT a/α, ho::HphMX4/ho::HphMX4, ura3::KanMX4/ura3::KanMX4, lys2::URA3/LYS2
7	F7	71x265	MAT a/α, ho::HphMX4/ho::HphMX4, ura3::KanMX4/ura3::KanMX4, lys2::URA3/LYS2
7	F8	72x266	MAT a/α, ho::HphMX4/ho::HphMX4, ura3::KanMX4/ura3::KanMX4, lys2::URA3/LYS2
7	F9	73x267	MAT a/α, ho::HphMX4/ho::HphMX4, ura3::KanMX4/ura3::KanMX4, lys2::URA3/LYS2
7	F10	74x268	MAT a/α, ho::HphMX4/ho::HphMX4, ura3::KanMX4/ura3::KanMX4, lys2::URA3/LYS2
7	F11	71x233	MAT a/α, ho::HphMX4/ho::HphMX4, ura3::KanMX4/ura3::KanMX4, lys2::URA3/LYS2
7	F12	NAxWA (CC429)	MAT a/α, ho::HphMX4/ho::HphMX4, ura3::KanMX4/ura3::KanMX4, lys2::URA3/LYS2
7	G1	77x282	MAT a/α, ho::HphMX4/ho::HphMX4, ura3::KanMX4/ura3::KanMX4, lys2::URA3/LYS2
7	G2	78x283	MAT a/α, ho::HphMX4/ho::HphMX4, ura3::KanMX4/ura3::KanMX4, lys2::URA3/LYS2
7	G3	75x284	MAT a/α, ho::HphMX4/ho::HphMX4, ura3::KanMX4/ura3::KanMX4, lys2::URA3/LYS2
7	G4	80x286	MAT a/α, ho::HphMX4/ho::HphMX4, ura3::KanMX4/ura3::KanMX4, lys2::URA3/LYS2
7	G5	81x287	MAT a/α, ho::HphMX4/ho::HphMX4, ura3::KanMX4/ura3::KanMX4, lys2::URA3/LYS2
7	G6	82x277	MAT a/α, ho::HphMX4/ho::HphMX4, ura3::KanMX4/ura3::KanMX4, lys2::URA3/LYS2
7	G7	83x211	MAT a/α, ho::HphMX4/ho::HphMX4, ura3::KanMX4/ura3::KanMX4, lys2::URA3/LYS2
7	G8	84x279	MAT a/α, ho::HphMX4/ho::HphMX4, ura3::KanMX4/ura3::KanMX4, lys2::URA3/LYS2
7	G9	85x280	MAT a/α, ho::HphMX4/ho::HphMX4, ura3::KanMX4/ura3::KanMX4, lys2::URA3/LYS2
7	G10	86x281	MAT a/α, ho::HphMX4/ho::HphMX4, ura3::KanMX4/ura3::KanMX4, lys2::URA3/LYS2
7	G11	83x247	MAT a/α, ho::HphMX4/ho::HphMX4, ura3::KanMX4/ura3::KanMX4, lys2::URA3/LYS2
7	G12	WAxWA (CC426)	MAT a/α, ho::HphMX4/ho::HphMX4, ura3::KanMX4/ura3::KanMX4, lys2::URA3/LYS2
7	H1	121x296	MAT a/α, ho::HphMX4/ho::HphMX4, ura3::KanMX4/ura3::KanMX4, lys2::URA3/LYS2
7	H2	122x297	MAT a/α, ho::HphMX4/ho::HphMX4, ura3::KanMX4/ura3::KanMX4, lys2::URA3/LYS2
7	H3	123x298	MAT a/α, ho::HphMX4/ho::HphMX4, ura3::KanMX4/ura3::KanMX4, lys2::URA3/LYS2
7	H4	124x300	MAT a/α, ho::HphMX4/ho::HphMX4, ura3::KanMX4/ura3::KanMX4, lys2::URA3/LYS2
7	H5	126x301	MAT a/α, ho::HphMX4/ho::HphMX4, ura3::KanMX4/ura3::KanMX4, lys2::URA3/LYS2
7	H6	127x304	MAT a/α, ho::HphMX4/ho::HphMX4, ura3::KanMX4/ura3::KanMX4, lys2::URA3/LYS2
7	H7	128x291	MAT a/α, ho::HphMX4/ho::HphMX4, ura3::KanMX4/ura3::KanMX4, lys2::URA3/LYS2
7	H8	129x292	MAT a/α, ho::HphMX4/ho::HphMX4, ura3::KanMX4/ura3::KanMX4, lys2::URA3/LYS2
7	H9	130x293	MAT a/α, ho::HphMX4/ho::HphMX4, ura3::KanMX4/ura3::KanMX4, lys2::URA3/LYS2
7	H10	131x295	MAT a/α, ho::HphMX4/ho::HphMX4, ura3::KanMX4/ura3::KanMX4, lys2::URA3/LYS2
7	H11	128x259	MAT a/α, ho::HphMX4/ho::HphMX4, ura3::KanMX4/ura3::KanMX4, lys2::URA3/LYS2
7	H12	NAxNA (CC440)	MAT a/α, ho::HphMX4/ho::HphMX4, ura3::KanMX4/ura3::KanMX4, lys2::URA3/LYS2
8	A1	1x204	MAT a/α, ho::HphMX4/ho::HphMX4, ura3::KanMX4/ura3::KanMX4, lys2::URA3/LYS2
8	A2	39x205	MAT a/α, ho::HphMX4/ho::HphMX4, ura3::KanMX4/ura3::KanMX4, lys2::URA3/LYS2
8	A3	3x289	MAT a/α, ho::HphMX4/ho::HphMX4, ura3::KanMX4/ura3::KanMX4, lys2::URA3/LYS2
8	A4	4x207	MAT a/α, ho::HphMX4/ho::HphMX4, ura3::KanMX4/ura3::KanMX4, lys2::URA3/LYS2
8	A5	5x208	MAT a/α, ho::HphMX4/ho::HphMX4, ura3::KanMX4/ura3::KanMX4, lys2::URA3/LYS2
8	A6	6x209	MAT a/α, ho::HphMX4/ho::HphMX4, ura3::KanMX4/ura3::KanMX4, lys2::URA3/LYS2
8	A7	7x210	MAT a/α, ho::HphMX4/ho::HphMX4, ura3::KanMX4/ura3::KanMX4, lys2::URA3/LYS2
8	A8	8x201	MAT a/α, ho::HphMX4/ho::HphMX4, ura3::KanMX4/ura3::KanMX4, lys2::URA3/LYS2
8	A9	9x237	MAT a/α, ho::HphMX4/ho::HphMX4, ura3::KanMX4/ura3::KanMX4, lys2::URA3/LYS2
8	A10	10x203	MAT a/α, ho::HphMX4/ho::HphMX4, ura3::KanMX4/ura3::KanMX4, lys2::URA3/LYS2
8	A11	8x273	MAT a/α, ho::HphMX4/ho::HphMX4, ura3::KanMX4/ura3::KanMX4, lys2::URA3/LYS2
8	A12	WAxWA (CC424)	MAT a/α, ho::HphMX4/ho::HphMX4, ura3::KanMX4/ura3::KanMX4, lys2::URA3/LYS2
8	B1	14x216	MAT a/α, ho::HphMX4/ho::HphMX4, ura3::KanMX4/ura3::KanMX4, lys2::URA3/LYS2
8	B2	15x217	MAT a/α, ho::HphMX4/ho::HphMX4, ura3::KanMX4/ura3::KanMX4, lys2::URA3/LYS2
8	B3	16x218	MAT a/α, ho::HphMX4/ho::HphMX4, ura3::KanMX4/ura3::KanMX4, lys2::URA3/LYS2
8	B4	17x219	MAT a/α, ho::HphMX4/ho::HphMX4, ura3::KanMX4/ura3::KanMX4, lys2::URA3/LYS2
8	B5	18x220	MAT a/α, ho::HphMX4/ho::HphMX4, ura3::KanMX4/ura3::KanMX4, lys2::URA3/LYS2
8	B6	19x221	MAT a/α, ho::HphMX4/ho::HphMX4, ura3::KanMX4/ura3::KanMX4, lys2::URA3/LYS2
8	B7	21x238	MAT a/α, ho::HphMX4/ho::HphMX4, ura3::KanMX4/ura3::KanMX4, lys2::URA3/LYS2
8	B8	22x213	MAT a/α, ho::HphMX4/ho::HphMX4, ura3::KanMX4/ura3::KanMX4, lys2::URA3/LYS2
8	B9	24x214	MAT a/α, ho::HphMX4/ho::HphMX4, ura3::KanMX4/ura3::KanMX4, lys2::URA3/LYS2
8	B10	25x215	MAT a/α, ho::HphMX4/ho::HphMX4, ura3::KanMX4/ura3::KanMX4, lys2::URA3/LYS2
8	B11	22x286	MAT a/α, ho::HphMX4/ho::HphMX4, ura3::KanMX4/ura3::KanMX4, lys2::URA3/LYS2
8	B12	NAxNA (CC438)	MAT a/α, ho::HphMX4/ho::HphMX4, ura3::KanMX4/ura3::KanMX4, lys2::URA3/LYS2
8	C1	28x263	MAT a/α, ho::HphMX4/ho::HphMX4, ura3::KanMX4/ura3::KanMX4, lys2::URA3/LYS2
8	C2	29x231	MAT a/α, ho::HphMX4/ho::HphMX4, ura3::KanMX4/ura3::KanMX4, lys2::URA3/LYS2
8	C3	30x232	MAT a/α, ho::HphMX4/ho::HphMX4, ura3::KanMX4/ura3::KanMX4, lys2::URA3/LYS2
8	C4	32x233	MAT a/α, ho::HphMX4/ho::HphMX4, ura3::KanMX4/ura3::KanMX4, lys2::URA3/LYS2
8	C5	33x212	MAT a/α, ho::HphMX4/ho::HphMX4, ura3::KanMX4/ura3::KanMX4, lys2::URA3/LYS2
8	C6	34x235	MAT a/α, ho::HphMX4/ho::HphMX4, ura3::KanMX4/ura3::KanMX4, lys2::URA3/LYS2
8	C7	35x236	MAT a/α, ho::HphMX4/ho::HphMX4, ura3::KanMX4/ura3::KanMX4, lys2::URA3/LYS2
8	C8	36x227	MAT a/α, ho::HphMX4/ho::HphMX4, ura3::KanMX4/ura3::KanMX4, lys2::URA3/LYS2
8	C9	37x228	MAT a/α, ho::HphMX4/ho::HphMX4, ura3::KanMX4/ura3::KanMX4, lys2::URA3/LYS2
8	C10	38x229	MAT a/α, ho::HphMX4/ho::HphMX4, ura3::KanMX4/ura3::KanMX4, lys2::URA3/LYS2
8	C11	36x300	MAT a/α, ho::HphMX4/ho::HphMX4, ura3::KanMX4/ura3::KanMX4, lys2::URA3/LYS2
8	C12	NAxWA (CC428)	MAT a/α, ho::HphMX4/ho::HphMX4, ura3::KanMX4/ura3::KanMX4, lys2::URA3/LYS2
8	D1	11x244	MAT a/α, ho::HphMX4/ho::HphMX4, ura3::KanMX4/ura3::KanMX4, lys2::URA3/LYS2
8	D2	42x245	MAT a/α, ho::HphMX4/ho::HphMX4, ura3::KanMX4/ura3::KanMX4, lys2::URA3/LYS2
8	D3	43x246	MAT a/α, ho::HphMX4/ho::HphMX4, ura3::KanMX4/ura3::KanMX4, lys2::URA3/LYS2
8	D4	44x247	MAT a/α, ho::HphMX4/ho::HphMX4, ura3::KanMX4/ura3::KanMX4, lys2::URA3/LYS2
8	D5	45x248	MAT a/α, ho::HphMX4/ho::HphMX4, ura3::KanMX4/ura3::KanMX4, lys2::URA3/LYS2
8	D6	46x224	MAT a/α, ho::HphMX4/ho::HphMX4, ura3::KanMX4/ura3::KanMX4, lys2::URA3/LYS2
8	D7	13x252	MAT a/α, ho::HphMX4/ho::HphMX4, ura3::KanMX4/ura3::KanMX4, lys2::URA3/LYS2
8	D8	27x239	MAT a/α, ho::HphMX4/ho::HphMX4, ura3::KanMX4/ura3::KanMX4, lys2::URA3/LYS2
8	D9	40x241	MAT a/α, ho::HphMX4/ho::HphMX4, ura3::KanMX4/ura3::KanMX4, lys2::URA3/LYS2
8	D10	52x243	MAT a/α, ho::HphMX4/ho::HphMX4, ura3::KanMX4/ura3::KanMX4, lys2::URA3/LYS2
8	D11	27x208	MAT a/α, ho::HphMX4/ho::HphMX4, ura3::KanMX4/ura3::KanMX4, lys2::URA3/LYS2
8	D12	WAxWA (CC425)	MAT a/α, ho::HphMX4/ho::HphMX4, ura3::KanMX4/ura3::KanMX4, lys2::URA3/LYS2
8	E1	26x276	MAT a/α, ho::HphMX4/ho::HphMX4, ura3::KanMX4/ura3::KanMX4, lys2::URA3/LYS2
8	E2	51x257	MAT a/α, ho::HphMX4/ho::HphMX4, ura3::KanMX4/ura3::KanMX4, lys2::URA3/LYS2
8	E3	55x305	MAT a/α, ho::HphMX4/ho::HphMX4, ura3::KanMX4/ura3::KanMX4, lys2::URA3/LYS2
8	E4	56x259	MAT a/α, ho::HphMX4/ho::HphMX4, ura3::KanMX4/ura3::KanMX4, lys2::URA3/LYS2
8	E5	57x260	MAT a/α, ho::HphMX4/ho::HphMX4, ura3::KanMX4/ura3::KanMX4, lys2::URA3/LYS2
8	E6	132x261	MAT a/α, ho::HphMX4/ho::HphMX4, ura3::KanMX4/ura3::KanMX4, lys2::URA3/LYS2
8	E7	59x262	MAT a/α, ho::HphMX4/ho::HphMX4, ura3::KanMX4/ura3::KanMX4, lys2::URA3/LYS2
8	E8	60x253	MAT a/α, ho::HphMX4/ho::HphMX4, ura3::KanMX4/ura3::KanMX4, lys2::URA3/LYS2
8	E9	61x251	MAT a/α, ho::HphMX4/ho::HphMX4, ura3::KanMX4/ura3::KanMX4, lys2::URA3/LYS2
8	E10	62x255	MAT a/α, ho::HphMX4/ho::HphMX4, ura3::KanMX4/ura3::KanMX4, lys2::URA3/LYS2
8	E11	60x220	MAT a/α, ho::HphMX4/ho::HphMX4, ura3::KanMX4/ura3::KanMX4, lys2::URA3/LYS2
8	E12	NAxNA (CC439)	MAT a/α, ho::HphMX4/ho::HphMX4, ura3::KanMX4/ura3::KanMX4, lys2::URA3/LYS2
8	F1	65x268	MAT a/α, ho::HphMX4/ho::HphMX4, ura3::KanMX4/ura3::KanMX4, lys2::URA3/LYS2
8	F2	66x270	MAT a/α, ho::HphMX4/ho::HphMX4, ura3::KanMX4/ura3::KanMX4, lys2::URA3/LYS2
8	F3	63x271	MAT a/α, ho::HphMX4/ho::HphMX4, ura3::KanMX4/ura3::KanMX4, lys2::URA3/LYS2
8	F4	68x272	MAT a/α, ho::HphMX4/ho::HphMX4, ura3::KanMX4/ura3::KanMX4, lys2::URA3/LYS2
8	F5	69x273	MAT a/α, ho::HphMX4/ho::HphMX4, ura3::KanMX4/ura3::KanMX4, lys2::URA3/LYS2
8	F6	70x274	MAT a/α, ho::HphMX4/ho::HphMX4, ura3::KanMX4/ura3::KanMX4, lys2::URA3/LYS2
8	F7	71x275	MAT a/α, ho::HphMX4/ho::HphMX4, ura3::KanMX4/ura3::KanMX4, lys2::URA3/LYS2
8	F8	72x265	MAT a/α, ho::HphMX4/ho::HphMX4, ura3::KanMX4/ura3::KanMX4, lys2::URA3/LYS2
8	F9	73x266	MAT a/α, ho::HphMX4/ho::HphMX4, ura3::KanMX4/ura3::KanMX4, lys2::URA3/LYS2
8	F10	74x267	MAT a/α, ho::HphMX4/ho::HphMX4, ura3::KanMX4/ura3::KanMX4, lys2::URA3/LYS2
8	F11	72x212	MAT a/α, ho::HphMX4/ho::HphMX4, ura3::KanMX4/ura3::KanMX4, lys2::URA3/LYS2
8	F12	NAxWA (CC429)	MAT a/α, ho::HphMX4/ho::HphMX4, ura3::KanMX4/ura3::KanMX4, lys2::URA3/LYS2
8	G1	77x281	MAT a/α, ho::HphMX4/ho::HphMX4, ura3::KanMX4/ura3::KanMX4, lys2::URA3/LYS2
8	G2	78x282	MAT a/α, ho::HphMX4/ho::HphMX4, ura3::KanMX4/ura3::KanMX4, lys2::URA3/LYS2
8	G3	75x283	MAT a/α, ho::HphMX4/ho::HphMX4, ura3::KanMX4/ura3::KanMX4, lys2::URA3/LYS2
8	G4	80x284	MAT a/α, ho::HphMX4/ho::HphMX4, ura3::KanMX4/ura3::KanMX4, lys2::URA3/LYS2
8	G5	81x286	MAT a/α, ho::HphMX4/ho::HphMX4, ura3::KanMX4/ura3::KanMX4, lys2::URA3/LYS2
8	G6	82x287	MAT a/α, ho::HphMX4/ho::HphMX4, ura3::KanMX4/ura3::KanMX4, lys2::URA3/LYS2
8	G7	83x277	MAT a/α, ho::HphMX4/ho::HphMX4, ura3::KanMX4/ura3::KanMX4, lys2::URA3/LYS2
8	G8	84x211	MAT a/α, ho::HphMX4/ho::HphMX4, ura3::KanMX4/ura3::KanMX4, lys2::URA3/LYS2
8	G9	85x279	MAT a/α, ho::HphMX4/ho::HphMX4, ura3::KanMX4/ura3::KanMX4, lys2::URA3/LYS2
8	G10	86x280	MAT a/α, ho::HphMX4/ho::HphMX4, ura3::KanMX4/ura3::KanMX4, lys2::URA3/LYS2
8	G11	84x248	MAT a/α, ho::HphMX4/ho::HphMX4, ura3::KanMX4/ura3::KanMX4, lys2::URA3/LYS2
8	G12	WAxWA (CC426)	MAT a/α, ho::HphMX4/ho::HphMX4, ura3::KanMX4/ura3::KanMX4, lys2::URA3/LYS2
8	H1	121x295	MAT a/α, ho::HphMX4/ho::HphMX4, ura3::KanMX4/ura3::KanMX4, lys2::URA3/LYS2
8	H2	122x296	MAT a/α, ho::HphMX4/ho::HphMX4, ura3::KanMX4/ura3::KanMX4, lys2::URA3/LYS2
8	H3	123x297	MAT a/α, ho::HphMX4/ho::HphMX4, ura3::KanMX4/ura3::KanMX4, lys2::URA3/LYS2
8	H4	124x298	MAT a/α, ho::HphMX4/ho::HphMX4, ura3::KanMX4/ura3::KanMX4, lys2::URA3/LYS2
8	H5	126x300	MAT a/α, ho::HphMX4/ho::HphMX4, ura3::KanMX4/ura3::KanMX4, lys2::URA3/LYS2
8	H6	127x301	MAT a/α, ho::HphMX4/ho::HphMX4, ura3::KanMX4/ura3::KanMX4, lys2::URA3/LYS2
8	H7	128x304	MAT a/α, ho::HphMX4/ho::HphMX4, ura3::KanMX4/ura3::KanMX4, lys2::URA3/LYS2
8	H8	129x291	MAT a/α, ho::HphMX4/ho::HphMX4, ura3::KanMX4/ura3::KanMX4, lys2::URA3/LYS2
8	H9	130x292	MAT a/α, ho::HphMX4/ho::HphMX4, ura3::KanMX4/ura3::KanMX4, lys2::URA3/LYS2
8	H10	131x293	MAT a/α, ho::HphMX4/ho::HphMX4, ura3::KanMX4/ura3::KanMX4, lys2::URA3/LYS2
8	H11	129x260	MAT a/α, ho::HphMX4/ho::HphMX4, ura3::KanMX4/ura3::KanMX4, lys2::URA3/LYS2
8	H12	NAxNA (CC440)	MAT a/α, ho::HphMX4/ho::HphMX4, ura3::KanMX4/ura3::KanMX4, lys2::URA3/LYS2
9	A1	1x203	MAT a/α, ho::HphMX4/ho::HphMX4, ura3::KanMX4/ura3::KanMX4, lys2::URA3/LYS2
9	A2	39x204	MAT a/α, ho::HphMX4/ho::HphMX4, ura3::KanMX4/ura3::KanMX4, lys2::URA3/LYS2
9	A3	3x205	MAT a/α, ho::HphMX4/ho::HphMX4, ura3::KanMX4/ura3::KanMX4, lys2::URA3/LYS2
9	A4	4x289	MAT a/α, ho::HphMX4/ho::HphMX4, ura3::KanMX4/ura3::KanMX4, lys2::URA3/LYS2
9	A5	5x207	MAT a/α, ho::HphMX4/ho::HphMX4, ura3::KanMX4/ura3::KanMX4, lys2::URA3/LYS2
9	A6	6x208	MAT a/α, ho::HphMX4/ho::HphMX4, ura3::KanMX4/ura3::KanMX4, lys2::URA3/LYS2
9	A7	7x209	MAT a/α, ho::HphMX4/ho::HphMX4, ura3::KanMX4/ura3::KanMX4, lys2::URA3/LYS2
9	A8	8x210	MAT a/α, ho::HphMX4/ho::HphMX4, ura3::KanMX4/ura3::KanMX4, lys2::URA3/LYS2
9	A9	9x201	MAT a/α, ho::HphMX4/ho::HphMX4, ura3::KanMX4/ura3::KanMX4, lys2::URA3/LYS2
9	A10	10x237	MAT a/α, ho::HphMX4/ho::HphMX4, ura3::KanMX4/ura3::KanMX4, lys2::URA3/LYS2
9	A11	9x274	MAT a/α, ho::HphMX4/ho::HphMX4, ura3::KanMX4/ura3::KanMX4, lys2::URA3/LYS2
9	A12	WAxWA (CC424)	MAT a/α, ho::HphMX4/ho::HphMX4, ura3::KanMX4/ura3::KanMX4, lys2::URA3/LYS2
9	B1	14x215	MAT a/α, ho::HphMX4/ho::HphMX4, ura3::KanMX4/ura3::KanMX4, lys2::URA3/LYS2
9	B2	15x216	MAT a/α, ho::HphMX4/ho::HphMX4, ura3::KanMX4/ura3::KanMX4, lys2::URA3/LYS2
9	B3	16x217	MAT a/α, ho::HphMX4/ho::HphMX4, ura3::KanMX4/ura3::KanMX4, lys2::URA3/LYS2
9	B4	17x218	MAT a/α, ho::HphMX4/ho::HphMX4, ura3::KanMX4/ura3::KanMX4, lys2::URA3/LYS2
9	B5	18x219	MAT a/α, ho::HphMX4/ho::HphMX4, ura3::KanMX4/ura3::KanMX4, lys2::URA3/LYS2
9	B6	19x220	MAT a/α, ho::HphMX4/ho::HphMX4, ura3::KanMX4/ura3::KanMX4, lys2::URA3/LYS2
9	B7	21x221	MAT a/α, ho::HphMX4/ho::HphMX4, ura3::KanMX4/ura3::KanMX4, lys2::URA3/LYS2
9	B8	22x238	MAT a/α, ho::HphMX4/ho::HphMX4, ura3::KanMX4/ura3::KanMX4, lys2::URA3/LYS2
9	B9	24x213	MAT a/α, ho::HphMX4/ho::HphMX4, ura3::KanMX4/ura3::KanMX4, lys2::URA3/LYS2
9	B10	25x214	MAT a/α, ho::HphMX4/ho::HphMX4, ura3::KanMX4/ura3::KanMX4, lys2::URA3/LYS2
9	B11	24x287	MAT a/α, ho::HphMX4/ho::HphMX4, ura3::KanMX4/ura3::KanMX4, lys2::URA3/LYS2
9	B12	NAxNA (CC438)	MAT a/α, ho::HphMX4/ho::HphMX4, ura3::KanMX4/ura3::KanMX4, lys2::URA3/LYS2
9	C1	28x229	MAT a/α, ho::HphMX4/ho::HphMX4, ura3::KanMX4/ura3::KanMX4, lys2::URA3/LYS2
9	C2	29x263	MAT a/α, ho::HphMX4/ho::HphMX4, ura3::KanMX4/ura3::KanMX4, lys2::URA3/LYS2
9	C3	30x231	MAT a/α, ho::HphMX4/ho::HphMX4, ura3::KanMX4/ura3::KanMX4, lys2::URA3/LYS2
9	C4	32x232	MAT a/α, ho::HphMX4/ho::HphMX4, ura3::KanMX4/ura3::KanMX4, lys2::URA3/LYS2
9	C5	33x233	MAT a/α, ho::HphMX4/ho::HphMX4, ura3::KanMX4/ura3::KanMX4, lys2::URA3/LYS2
9	C6	34x212	MAT a/α, ho::HphMX4/ho::HphMX4, ura3::KanMX4/ura3::KanMX4, lys2::URA3/LYS2
9	C7	35x235	MAT a/α, ho::HphMX4/ho::HphMX4, ura3::KanMX4/ura3::KanMX4, lys2::URA3/LYS2
9	C8	36x236	MAT a/α, ho::HphMX4/ho::HphMX4, ura3::KanMX4/ura3::KanMX4, lys2::URA3/LYS2
9	C9	37x227	MAT a/α, ho::HphMX4/ho::HphMX4, ura3::KanMX4/ura3::KanMX4, lys2::URA3/LYS2
9	C10	38x228	MAT a/α, ho::HphMX4/ho::HphMX4, ura3::KanMX4/ura3::KanMX4, lys2::URA3/LYS2
9	C11	37x301	MAT a/α, ho::HphMX4/ho::HphMX4, ura3::KanMX4/ura3::KanMX4, lys2::URA3/LYS2
9	C12	NAxWA (CC428)	MAT a/α, ho::HphMX4/ho::HphMX4, ura3::KanMX4/ura3::KanMX4, lys2::URA3/LYS2
9	D1	11x243	MAT a/α, ho::HphMX4/ho::HphMX4, ura3::KanMX4/ura3::KanMX4, lys2::URA3/LYS2
9	D2	42x244	MAT a/α, ho::HphMX4/ho::HphMX4, ura3::KanMX4/ura3::KanMX4, lys2::URA3/LYS2
9	D3	43x245	MAT a/α, ho::HphMX4/ho::HphMX4, ura3::KanMX4/ura3::KanMX4, lys2::URA3/LYS2
9	D4	44x246	MAT a/α, ho::HphMX4/ho::HphMX4, ura3::KanMX4/ura3::KanMX4, lys2::URA3/LYS2
9	D5	45x247	MAT a/α, ho::HphMX4/ho::HphMX4, ura3::KanMX4/ura3::KanMX4, lys2::URA3/LYS2
9	D6	46x248	MAT a/α, ho::HphMX4/ho::HphMX4, ura3::KanMX4/ura3::KanMX4, lys2::URA3/LYS2
9	D7	13x224	MAT a/α, ho::HphMX4/ho::HphMX4, ura3::KanMX4/ura3::KanMX4, lys2::URA3/LYS2
9	D8	27x252	MAT a/α, ho::HphMX4/ho::HphMX4, ura3::KanMX4/ura3::KanMX4, lys2::URA3/LYS2
9	D9	40x239	MAT a/α, ho::HphMX4/ho::HphMX4, ura3::KanMX4/ura3::KanMX4, lys2::URA3/LYS2
9	D10	52x241	MAT a/α, ho::HphMX4/ho::HphMX4, ura3::KanMX4/ura3::KanMX4, lys2::URA3/LYS2
9	D11	40x209	MAT a/α, ho::HphMX4/ho::HphMX4, ura3::KanMX4/ura3::KanMX4, lys2::URA3/LYS2
9	D12	WAxWA (CC425)	MAT a/α, ho::HphMX4/ho::HphMX4, ura3::KanMX4/ura3::KanMX4, lys2::URA3/LYS2
9	E1	26x255	MAT a/α, ho::HphMX4/ho::HphMX4, ura3::KanMX4/ura3::KanMX4, lys2::URA3/LYS2
9	E2	51x276	MAT a/α, ho::HphMX4/ho::HphMX4, ura3::KanMX4/ura3::KanMX4, lys2::URA3/LYS2
9	E3	55x257	MAT a/α, ho::HphMX4/ho::HphMX4, ura3::KanMX4/ura3::KanMX4, lys2::URA3/LYS2
9	E4	56x305	MAT a/α, ho::HphMX4/ho::HphMX4, ura3::KanMX4/ura3::KanMX4, lys2::URA3/LYS2
9	E5	57x259	MAT a/α, ho::HphMX4/ho::HphMX4, ura3::KanMX4/ura3::KanMX4, lys2::URA3/LYS2
9	E6	132x260	MAT a/α, ho::HphMX4/ho::HphMX4, ura3::KanMX4/ura3::KanMX4, lys2::URA3/LYS2
9	E7	59x261	MAT a/α, ho::HphMX4/ho::HphMX4, ura3::KanMX4/ura3::KanMX4, lys2::URA3/LYS2
9	E8	60x262	MAT a/α, ho::HphMX4/ho::HphMX4, ura3::KanMX4/ura3::KanMX4, lys2::URA3/LYS2
9	E9	61x253	MAT a/α, ho::HphMX4/ho::HphMX4, ura3::KanMX4/ura3::KanMX4, lys2::URA3/LYS2
9	E10	62x251	MAT a/α, ho::HphMX4/ho::HphMX4, ura3::KanMX4/ura3::KanMX4, lys2::URA3/LYS2
9	E11	61x221	MAT a/α, ho::HphMX4/ho::HphMX4, ura3::KanMX4/ura3::KanMX4, lys2::URA3/LYS2
9	E12	NAxNA (CC439)	MAT a/α, ho::HphMX4/ho::HphMX4, ura3::KanMX4/ura3::KanMX4, lys2::URA3/LYS2
9	F1	65x267	MAT a/α, ho::HphMX4/ho::HphMX4, ura3::KanMX4/ura3::KanMX4, lys2::URA3/LYS2
9	F2	66x268	MAT a/α, ho::HphMX4/ho::HphMX4, ura3::KanMX4/ura3::KanMX4, lys2::URA3/LYS2
9	F3	63x270	MAT a/α, ho::HphMX4/ho::HphMX4, ura3::KanMX4/ura3::KanMX4, lys2::URA3/LYS2
9	F4	68x271	MAT a/α, ho::HphMX4/ho::HphMX4, ura3::KanMX4/ura3::KanMX4, lys2::URA3/LYS2
9	F5	69x272	MAT a/α, ho::HphMX4/ho::HphMX4, ura3::KanMX4/ura3::KanMX4, lys2::URA3/LYS2
9	F6	70x273	MAT a/α, ho::HphMX4/ho::HphMX4, ura3::KanMX4/ura3::KanMX4, lys2::URA3/LYS2
9	F7	71x274	MAT a/α, ho::HphMX4/ho::HphMX4, ura3::KanMX4/ura3::KanMX4, lys2::URA3/LYS2
9	F8	72x275	MAT a/α, ho::HphMX4/ho::HphMX4, ura3::KanMX4/ura3::KanMX4, lys2::URA3/LYS2
9	F9	73x265	MAT a/α, ho::HphMX4/ho::HphMX4, ura3::KanMX4/ura3::KanMX4, lys2::URA3/LYS2
9	F10	74x266	MAT a/α, ho::HphMX4/ho::HphMX4, ura3::KanMX4/ura3::KanMX4, lys2::URA3/LYS2
9	F11	73x235	MAT a/α, ho::HphMX4/ho::HphMX4, ura3::KanMX4/ura3::KanMX4, lys2::URA3/LYS2
9	F12	NAxWA (CC429)	MAT a/α, ho::HphMX4/ho::HphMX4, ura3::KanMX4/ura3::KanMX4, lys2::URA3/LYS2
9	G1	77x280	MAT a/α, ho::HphMX4/ho::HphMX4, ura3::KanMX4/ura3::KanMX4, lys2::URA3/LYS2
9	G2	78x281	MAT a/α, ho::HphMX4/ho::HphMX4, ura3::KanMX4/ura3::KanMX4, lys2::URA3/LYS2
9	G3	75x282	MAT a/α, ho::HphMX4/ho::HphMX4, ura3::KanMX4/ura3::KanMX4, lys2::URA3/LYS2
9	G4	80x283	MAT a/α, ho::HphMX4/ho::HphMX4, ura3::KanMX4/ura3::KanMX4, lys2::URA3/LYS2
9	G5	81x284	MAT a/α, ho::HphMX4/ho::HphMX4, ura3::KanMX4/ura3::KanMX4, lys2::URA3/LYS2
9	G6	82x286	MAT a/α, ho::HphMX4/ho::HphMX4, ura3::KanMX4/ura3::KanMX4, lys2::URA3/LYS2
9	G7	83x287	MAT a/α, ho::HphMX4/ho::HphMX4, ura3::KanMX4/ura3::KanMX4, lys2::URA3/LYS2
9	G8	84x277	MAT a/α, ho::HphMX4/ho::HphMX4, ura3::KanMX4/ura3::KanMX4, lys2::URA3/LYS2
9	G9	85x211	MAT a/α, ho::HphMX4/ho::HphMX4, ura3::KanMX4/ura3::KanMX4, lys2::URA3/LYS2
9	G10	86x279	MAT a/α, ho::HphMX4/ho::HphMX4, ura3::KanMX4/ura3::KanMX4, lys2::URA3/LYS2
9	G11	85x224	MAT a/α, ho::HphMX4/ho::HphMX4, ura3::KanMX4/ura3::KanMX4, lys2::URA3/LYS2
9	G12	WAxWA (CC426)	MAT a/α, ho::HphMX4/ho::HphMX4, ura3::KanMX4/ura3::KanMX4, lys2::URA3/LYS2
9	H1	121x293	MAT a/α, ho::HphMX4/ho::HphMX4, ura3::KanMX4/ura3::KanMX4, lys2::URA3/LYS2
9	H2	122x295	MAT a/α, ho::HphMX4/ho::HphMX4, ura3::KanMX4/ura3::KanMX4, lys2::URA3/LYS2
9	H3	123x296	MAT a/α, ho::HphMX4/ho::HphMX4, ura3::KanMX4/ura3::KanMX4, lys2::URA3/LYS2
9	H4	124x297	MAT a/α, ho::HphMX4/ho::HphMX4, ura3::KanMX4/ura3::KanMX4, lys2::URA3/LYS2
9	H5	126x298	MAT a/α, ho::HphMX4/ho::HphMX4, ura3::KanMX4/ura3::KanMX4, lys2::URA3/LYS2
9	H6	127x300	MAT a/α, ho::HphMX4/ho::HphMX4, ura3::KanMX4/ura3::KanMX4, lys2::URA3/LYS2
9	H7	128x301	MAT a/α, ho::HphMX4/ho::HphMX4, ura3::KanMX4/ura3::KanMX4, lys2::URA3/LYS2
9	H8	129x304	MAT a/α, ho::HphMX4/ho::HphMX4, ura3::KanMX4/ura3::KanMX4, lys2::URA3/LYS2
9	H9	130x291	MAT a/α, ho::HphMX4/ho::HphMX4, ura3::KanMX4/ura3::KanMX4, lys2::URA3/LYS2
9	H10	131x292	MAT a/α, ho::HphMX4/ho::HphMX4, ura3::KanMX4/ura3::KanMX4, lys2::URA3/LYS2
9	H11	130x261	MAT a/α, ho::HphMX4/ho::HphMX4, ura3::KanMX4/ura3::KanMX4, lys2::URA3/LYS2
9	H12	NAxNA (CC440)	MAT a/α, ho::HphMX4/ho::HphMX4, ura3::KanMX4/ura3::KanMX4, lys2::URA3/LYS2
10	A1	1x237	MAT a/α, ho::HphMX4/ho::HphMX4, ura3::KanMX4/ura3::KanMX4, lys2::URA3/LYS2
10	A2	39x203	MAT a/α, ho::HphMX4/ho::HphMX4, ura3::KanMX4/ura3::KanMX4, lys2::URA3/LYS2
10	A3	3x204	MAT a/α, ho::HphMX4/ho::HphMX4, ura3::KanMX4/ura3::KanMX4, lys2::URA3/LYS2
10	A4	4x205	MAT a/α, ho::HphMX4/ho::HphMX4, ura3::KanMX4/ura3::KanMX4, lys2::URA3/LYS2
10	A5	5x289	MAT a/α, ho::HphMX4/ho::HphMX4, ura3::KanMX4/ura3::KanMX4, lys2::URA3/LYS2
10	A6	6x207	MAT a/α, ho::HphMX4/ho::HphMX4, ura3::KanMX4/ura3::KanMX4, lys2::URA3/LYS2
10	A7	7x208	MAT a/α, ho::HphMX4/ho::HphMX4, ura3::KanMX4/ura3::KanMX4, lys2::URA3/LYS2
10	A8	8x209	MAT a/α, ho::HphMX4/ho::HphMX4, ura3::KanMX4/ura3::KanMX4, lys2::URA3/LYS2
10	A9	9x210	MAT a/α, ho::HphMX4/ho::HphMX4, ura3::KanMX4/ura3::KanMX4, lys2::URA3/LYS2
10	A10	10x201	MAT a/α, ho::HphMX4/ho::HphMX4, ura3::KanMX4/ura3::KanMX4, lys2::URA3/LYS2
10	A11	10x275	MAT a/α, ho::HphMX4/ho::HphMX4, ura3::KanMX4/ura3::KanMX4, lys2::URA3/LYS2
10	A12	WAxWA (CC424)	MAT a/α, ho::HphMX4/ho::HphMX4, ura3::KanMX4/ura3::KanMX4, lys2::URA3/LYS2
10	B1	14x214	MAT a/α, ho::HphMX4/ho::HphMX4, ura3::KanMX4/ura3::KanMX4, lys2::URA3/LYS2
10	B2	15x215	MAT a/α, ho::HphMX4/ho::HphMX4, ura3::KanMX4/ura3::KanMX4, lys2::URA3/LYS2
10	B3	16x216	MAT a/α, ho::HphMX4/ho::HphMX4, ura3::KanMX4/ura3::KanMX4, lys2::URA3/LYS2
10	B4	17x217	MAT a/α, ho::HphMX4/ho::HphMX4, ura3::KanMX4/ura3::KanMX4, lys2::URA3/LYS2
10	B5	18x218	MAT a/α, ho::HphMX4/ho::HphMX4, ura3::KanMX4/ura3::KanMX4, lys2::URA3/LYS2
10	B6	19x219	MAT a/α, ho::HphMX4/ho::HphMX4, ura3::KanMX4/ura3::KanMX4, lys2::URA3/LYS2
10	B7	21x220	MAT a/α, ho::HphMX4/ho::HphMX4, ura3::KanMX4/ura3::KanMX4, lys2::URA3/LYS2
10	B8	22x221	MAT a/α, ho::HphMX4/ho::HphMX4, ura3::KanMX4/ura3::KanMX4, lys2::URA3/LYS2
10	B9	24x238	MAT a/α, ho::HphMX4/ho::HphMX4, ura3::KanMX4/ura3::KanMX4, lys2::URA3/LYS2
10	B10	25x213	MAT a/α, ho::HphMX4/ho::HphMX4, ura3::KanMX4/ura3::KanMX4, lys2::URA3/LYS2
10	B11	25x277	MAT a/α, ho::HphMX4/ho::HphMX4, ura3::KanMX4/ura3::KanMX4, lys2::URA3/LYS2
10	B12	NAxNA (CC438)	MAT a/α, ho::HphMX4/ho::HphMX4, ura3::KanMX4/ura3::KanMX4, lys2::URA3/LYS2
10	C1	28x228	MAT a/α, ho::HphMX4/ho::HphMX4, ura3::KanMX4/ura3::KanMX4, lys2::URA3/LYS2
10	C2	29x229	MAT a/α, ho::HphMX4/ho::HphMX4, ura3::KanMX4/ura3::KanMX4, lys2::URA3/LYS2
10	C3	30x263	MAT a/α, ho::HphMX4/ho::HphMX4, ura3::KanMX4/ura3::KanMX4, lys2::URA3/LYS2
10	C4	32x231	MAT a/α, ho::HphMX4/ho::HphMX4, ura3::KanMX4/ura3::KanMX4, lys2::URA3/LYS2
10	C5	33x232	MAT a/α, ho::HphMX4/ho::HphMX4, ura3::KanMX4/ura3::KanMX4, lys2::URA3/LYS2
10	C6	34x233	MAT a/α, ho::HphMX4/ho::HphMX4, ura3::KanMX4/ura3::KanMX4, lys2::URA3/LYS2
10	C7	35x212	MAT a/α, ho::HphMX4/ho::HphMX4, ura3::KanMX4/ura3::KanMX4, lys2::URA3/LYS2
10	C8	36x235	MAT a/α, ho::HphMX4/ho::HphMX4, ura3::KanMX4/ura3::KanMX4, lys2::URA3/LYS2
10	C9	37x236	MAT a/α, ho::HphMX4/ho::HphMX4, ura3::KanMX4/ura3::KanMX4, lys2::URA3/LYS2
10	C10	38x227	MAT a/α, ho::HphMX4/ho::HphMX4, ura3::KanMX4/ura3::KanMX4, lys2::URA3/LYS2
10	C11	38x304	MAT a/α, ho::HphMX4/ho::HphMX4, ura3::KanMX4/ura3::KanMX4, lys2::URA3/LYS2
10	C12	NAxWA (CC428)	MAT a/α, ho::HphMX4/ho::HphMX4, ura3::KanMX4/ura3::KanMX4, lys2::URA3/LYS2
10	D1	11x241	MAT a/α, ho::HphMX4/ho::HphMX4, ura3::KanMX4/ura3::KanMX4, lys2::URA3/LYS2
10	D2	42x243	MAT a/α, ho::HphMX4/ho::HphMX4, ura3::KanMX4/ura3::KanMX4, lys2::URA3/LYS2
10	D3	43x244	MAT a/α, ho::HphMX4/ho::HphMX4, ura3::KanMX4/ura3::KanMX4, lys2::URA3/LYS2
10	D4	44x245	MAT a/α, ho::HphMX4/ho::HphMX4, ura3::KanMX4/ura3::KanMX4, lys2::URA3/LYS2
10	D5	45x246	MAT a/α, ho::HphMX4/ho::HphMX4, ura3::KanMX4/ura3::KanMX4, lys2::URA3/LYS2
10	D6	46x247	MAT a/α, ho::HphMX4/ho::HphMX4, ura3::KanMX4/ura3::KanMX4, lys2::URA3/LYS2
10	D7	13x248	MAT a/α, ho::HphMX4/ho::HphMX4, ura3::KanMX4/ura3::KanMX4, lys2::URA3/LYS2
10	D8	27x224	MAT a/α, ho::HphMX4/ho::HphMX4, ura3::KanMX4/ura3::KanMX4, lys2::URA3/LYS2
10	D9	40x252	MAT a/α, ho::HphMX4/ho::HphMX4, ura3::KanMX4/ura3::KanMX4, lys2::URA3/LYS2
10	D10	52x239	MAT a/α, ho::HphMX4/ho::HphMX4, ura3::KanMX4/ura3::KanMX4, lys2::URA3/LYS2
10	D11	52x210	MAT a/α, ho::HphMX4/ho::HphMX4, ura3::KanMX4/ura3::KanMX4, lys2::URA3/LYS2
10	D12	WAxWA (CC425)	MAT a/α, ho::HphMX4/ho::HphMX4, ura3::KanMX4/ura3::KanMX4, lys2::URA3/LYS2
10	E1	26x251	MAT a/α, ho::HphMX4/ho::HphMX4, ura3::KanMX4/ura3::KanMX4, lys2::URA3/LYS2
10	E2	51x255	MAT a/α, ho::HphMX4/ho::HphMX4, ura3::KanMX4/ura3::KanMX4, lys2::URA3/LYS2
10	E3	55x276	MAT a/α, ho::HphMX4/ho::HphMX4, ura3::KanMX4/ura3::KanMX4, lys2::URA3/LYS2
10	E4	56x257	MAT a/α, ho::HphMX4/ho::HphMX4, ura3::KanMX4/ura3::KanMX4, lys2::URA3/LYS2
10	E5	57x305	MAT a/α, ho::HphMX4/ho::HphMX4, ura3::KanMX4/ura3::KanMX4, lys2::URA3/LYS2
10	E6	132x259	MAT a/α, ho::HphMX4/ho::HphMX4, ura3::KanMX4/ura3::KanMX4, lys2::URA3/LYS2
10	E7	59x260	MAT a/α, ho::HphMX4/ho::HphMX4, ura3::KanMX4/ura3::KanMX4, lys2::URA3/LYS2
10	E8	60x261	MAT a/α, ho::HphMX4/ho::HphMX4, ura3::KanMX4/ura3::KanMX4, lys2::URA3/LYS2
10	E9	61x262	MAT a/α, ho::HphMX4/ho::HphMX4, ura3::KanMX4/ura3::KanMX4, lys2::URA3/LYS2
10	E10	62x253	MAT a/α, ho::HphMX4/ho::HphMX4, ura3::KanMX4/ura3::KanMX4, lys2::URA3/LYS2
10	E11	62x238	MAT a/α, ho::HphMX4/ho::HphMX4, ura3::KanMX4/ura3::KanMX4, lys2::URA3/LYS2
10	E12	NAxNA (CC439)	MAT a/α, ho::HphMX4/ho::HphMX4, ura3::KanMX4/ura3::KanMX4, lys2::URA3/LYS2
10	F1	65x266	MAT a/α, ho::HphMX4/ho::HphMX4, ura3::KanMX4/ura3::KanMX4, lys2::URA3/LYS2
10	F2	66x267	MAT a/α, ho::HphMX4/ho::HphMX4, ura3::KanMX4/ura3::KanMX4, lys2::URA3/LYS2
10	F3	63x268	MAT a/α, ho::HphMX4/ho::HphMX4, ura3::KanMX4/ura3::KanMX4, lys2::URA3/LYS2
10	F4	68x270	MAT a/α, ho::HphMX4/ho::HphMX4, ura3::KanMX4/ura3::KanMX4, lys2::URA3/LYS2
10	F5	69x271	MAT a/α, ho::HphMX4/ho::HphMX4, ura3::KanMX4/ura3::KanMX4, lys2::URA3/LYS2
10	F6	70x272	MAT a/α, ho::HphMX4/ho::HphMX4, ura3::KanMX4/ura3::KanMX4, lys2::URA3/LYS2
10	F7	71x273	MAT a/α, ho::HphMX4/ho::HphMX4, ura3::KanMX4/ura3::KanMX4, lys2::URA3/LYS2
10	F8	72x274	MAT a/α, ho::HphMX4/ho::HphMX4, ura3::KanMX4/ura3::KanMX4, lys2::URA3/LYS2
10	F9	73x275	MAT a/α, ho::HphMX4/ho::HphMX4, ura3::KanMX4/ura3::KanMX4, lys2::URA3/LYS2
10	F10	74x265	MAT a/α, ho::HphMX4/ho::HphMX4, ura3::KanMX4/ura3::KanMX4, lys2::URA3/LYS2
10	F11	74x236	MAT a/α, ho::HphMX4/ho::HphMX4, ura3::KanMX4/ura3::KanMX4, lys2::URA3/LYS2
10	F12	NAxWA (CC429)	MAT a/α, ho::HphMX4/ho::HphMX4, ura3::KanMX4/ura3::KanMX4, lys2::URA3/LYS2
10	G1	77x279	MAT a/α, ho::HphMX4/ho::HphMX4, ura3::KanMX4/ura3::KanMX4, lys2::URA3/LYS2
10	G2	78x280	MAT a/α, ho::HphMX4/ho::HphMX4, ura3::KanMX4/ura3::KanMX4, lys2::URA3/LYS2
10	G3	75x281	MAT a/α, ho::HphMX4/ho::HphMX4, ura3::KanMX4/ura3::KanMX4, lys2::URA3/LYS2
10	G4	80x282	MAT a/α, ho::HphMX4/ho::HphMX4, ura3::KanMX4/ura3::KanMX4, lys2::URA3/LYS2
10	G5	81x283	MAT a/α, ho::HphMX4/ho::HphMX4, ura3::KanMX4/ura3::KanMX4, lys2::URA3/LYS2
10	G6	82x284	MAT a/α, ho::HphMX4/ho::HphMX4, ura3::KanMX4/ura3::KanMX4, lys2::URA3/LYS2
10	G7	83x286	MAT a/α, ho::HphMX4/ho::HphMX4, ura3::KanMX4/ura3::KanMX4, lys2::URA3/LYS2
10	G8	84x287	MAT a/α, ho::HphMX4/ho::HphMX4, ura3::KanMX4/ura3::KanMX4, lys2::URA3/LYS2
10	G9	85x277	MAT a/α, ho::HphMX4/ho::HphMX4, ura3::KanMX4/ura3::KanMX4, lys2::URA3/LYS2
10	G10	86x211	MAT a/α, ho::HphMX4/ho::HphMX4, ura3::KanMX4/ura3::KanMX4, lys2::URA3/LYS2
10	G11	86x252	MAT a/α, ho::HphMX4/ho::HphMX4, ura3::KanMX4/ura3::KanMX4, lys2::URA3/LYS2
10	G12	WAxWA (CC426)	MAT a/α, ho::HphMX4/ho::HphMX4, ura3::KanMX4/ura3::KanMX4, lys2::URA3/LYS2
10	H1	121x292	MAT a/α, ho::HphMX4/ho::HphMX4, ura3::KanMX4/ura3::KanMX4, lys2::URA3/LYS2
10	H2	122x293	MAT a/α, ho::HphMX4/ho::HphMX4, ura3::KanMX4/ura3::KanMX4, lys2::URA3/LYS2
10	H3	123x295	MAT a/α, ho::HphMX4/ho::HphMX4, ura3::KanMX4/ura3::KanMX4, lys2::URA3/LYS2
10	H4	124x296	MAT a/α, ho::HphMX4/ho::HphMX4, ura3::KanMX4/ura3::KanMX4, lys2::URA3/LYS2
10	H5	126x297	MAT a/α, ho::HphMX4/ho::HphMX4, ura3::KanMX4/ura3::KanMX4, lys2::URA3/LYS2
10	H6	127x298	MAT a/α, ho::HphMX4/ho::HphMX4, ura3::KanMX4/ura3::KanMX4, lys2::URA3/LYS2
10	H7	128x300	MAT a/α, ho::HphMX4/ho::HphMX4, ura3::KanMX4/ura3::KanMX4, lys2::URA3/LYS2
10	H8	129x301	MAT a/α, ho::HphMX4/ho::HphMX4, ura3::KanMX4/ura3::KanMX4, lys2::URA3/LYS2
10	H9	130x304	MAT a/α, ho::HphMX4/ho::HphMX4, ura3::KanMX4/ura3::KanMX4, lys2::URA3/LYS2
10	H10	131x291	MAT a/α, ho::HphMX4/ho::HphMX4, ura3::KanMX4/ura3::KanMX4, lys2::URA3/LYS2
10	H11	131x262	MAT a/α, ho::HphMX4/ho::HphMX4, ura3::KanMX4/ura3::KanMX4, lys2::URA3/LYS2
10	H12	NAxNA (CC440)	MAT a/α, ho::HphMX4/ho::HphMX4, ura3::KanMX4/ura3::KanMX4, lys2::URA3/LYS2
11	A1	1x291	MAT a/α, ho::HphMX4/ho::HphMX4, ura3::KanMX4/ura3::KanMX4, lys2::URA3/LYS2
11	A2	39x292	MAT a/α, ho::HphMX4/ho::HphMX4, ura3::KanMX4/ura3::KanMX4, lys2::URA3/LYS2
11	A3	3x293	MAT a/α, ho::HphMX4/ho::HphMX4, ura3::KanMX4/ura3::KanMX4, lys2::URA3/LYS2
11	A4	4x295	MAT a/α, ho::HphMX4/ho::HphMX4, ura3::KanMX4/ura3::KanMX4, lys2::URA3/LYS2
11	A5	5x296	MAT a/α, ho::HphMX4/ho::HphMX4, ura3::KanMX4/ura3::KanMX4, lys2::URA3/LYS2
11	A6	6x297	MAT a/α, ho::HphMX4/ho::HphMX4, ura3::KanMX4/ura3::KanMX4, lys2::URA3/LYS2
11	A7	7x298	MAT a/α, ho::HphMX4/ho::HphMX4, ura3::KanMX4/ura3::KanMX4, lys2::URA3/LYS2
11	A8	8x300	MAT a/α, ho::HphMX4/ho::HphMX4, ura3::KanMX4/ura3::KanMX4, lys2::URA3/LYS2
11	A9	9x301	MAT a/α, ho::HphMX4/ho::HphMX4, ura3::KanMX4/ura3::KanMX4, lys2::URA3/LYS2
11	A10	10x304	MAT a/α, ho::HphMX4/ho::HphMX4, ura3::KanMX4/ura3::KanMX4, lys2::URA3/LYS2
11	A11	1x253	MAT a/α, ho::HphMX4/ho::HphMX4, ura3::KanMX4/ura3::KanMX4, lys2::URA3/LYS2
11	A12	WAxWA (CC424)	MAT a/α, ho::HphMX4/ho::HphMX4, ura3::KanMX4/ura3::KanMX4, lys2::URA3/LYS2
11	B1	14x201	MAT a/α, ho::HphMX4/ho::HphMX4, ura3::KanMX4/ura3::KanMX4, lys2::URA3/LYS2
11	B2	15x237	MAT a/α, ho::HphMX4/ho::HphMX4, ura3::KanMX4/ura3::KanMX4, lys2::URA3/LYS2
11	B3	16x203	MAT a/α, ho::HphMX4/ho::HphMX4, ura3::KanMX4/ura3::KanMX4, lys2::URA3/LYS2
11	B4	17x204	MAT a/α, ho::HphMX4/ho::HphMX4, ura3::KanMX4/ura3::KanMX4, lys2::URA3/LYS2
11	B5	18x205	MAT a/α, ho::HphMX4/ho::HphMX4, ura3::KanMX4/ura3::KanMX4, lys2::URA3/LYS2
11	B6	19x289	MAT a/α, ho::HphMX4/ho::HphMX4, ura3::KanMX4/ura3::KanMX4, lys2::URA3/LYS2
11	B7	21x207	MAT a/α, ho::HphMX4/ho::HphMX4, ura3::KanMX4/ura3::KanMX4, lys2::URA3/LYS2
11	B8	22x208	MAT a/α, ho::HphMX4/ho::HphMX4, ura3::KanMX4/ura3::KanMX4, lys2::URA3/LYS2
11	B9	24x209	MAT a/α, ho::HphMX4/ho::HphMX4, ura3::KanMX4/ura3::KanMX4, lys2::URA3/LYS2
11	B10	25x210	MAT a/α, ho::HphMX4/ho::HphMX4, ura3::KanMX4/ura3::KanMX4, lys2::URA3/LYS2
11	B11	14x265	MAT a/α, ho::HphMX4/ho::HphMX4, ura3::KanMX4/ura3::KanMX4, lys2::URA3/LYS2
11	B12	NAxNA (CC438)	MAT a/α, ho::HphMX4/ho::HphMX4, ura3::KanMX4/ura3::KanMX4, lys2::URA3/LYS2
11	C1	28x213	MAT a/α, ho::HphMX4/ho::HphMX4, ura3::KanMX4/ura3::KanMX4, lys2::URA3/LYS2
11	C2	29x214	MAT a/α, ho::HphMX4/ho::HphMX4, ura3::KanMX4/ura3::KanMX4, lys2::URA3/LYS2
11	C3	30x215	MAT a/α, ho::HphMX4/ho::HphMX4, ura3::KanMX4/ura3::KanMX4, lys2::URA3/LYS2
11	C4	32x216	MAT a/α, ho::HphMX4/ho::HphMX4, ura3::KanMX4/ura3::KanMX4, lys2::URA3/LYS2
11	C5	33x217	MAT a/α, ho::HphMX4/ho::HphMX4, ura3::KanMX4/ura3::KanMX4, lys2::URA3/LYS2
11	C6	34x218	MAT a/α, ho::HphMX4/ho::HphMX4, ura3::KanMX4/ura3::KanMX4, lys2::URA3/LYS2
11	C7	35x219	MAT a/α, ho::HphMX4/ho::HphMX4, ura3::KanMX4/ura3::KanMX4, lys2::URA3/LYS2
11	C8	36x220	MAT a/α, ho::HphMX4/ho::HphMX4, ura3::KanMX4/ura3::KanMX4, lys2::URA3/LYS2
11	C9	37x221	MAT a/α, ho::HphMX4/ho::HphMX4, ura3::KanMX4/ura3::KanMX4, lys2::URA3/LYS2
11	C10	38x238	MAT a/α, ho::HphMX4/ho::HphMX4, ura3::KanMX4/ura3::KanMX4, lys2::URA3/LYS2
11	C11	28x211	MAT a/α, ho::HphMX4/ho::HphMX4, ura3::KanMX4/ura3::KanMX4, lys2::URA3/LYS2
11	C12	NAxWA (CC428)	MAT a/α, ho::HphMX4/ho::HphMX4, ura3::KanMX4/ura3::KanMX4, lys2::URA3/LYS2
11	D1	11x227	MAT a/α, ho::HphMX4/ho::HphMX4, ura3::KanMX4/ura3::KanMX4, lys2::URA3/LYS2
11	D2	42x228	MAT a/α, ho::HphMX4/ho::HphMX4, ura3::KanMX4/ura3::KanMX4, lys2::URA3/LYS2
11	D3	43x229	MAT a/α, ho::HphMX4/ho::HphMX4, ura3::KanMX4/ura3::KanMX4, lys2::URA3/LYS2
11	D4	44x263	MAT a/α, ho::HphMX4/ho::HphMX4, ura3::KanMX4/ura3::KanMX4, lys2::URA3/LYS2
11	D5	45x231	MAT a/α, ho::HphMX4/ho::HphMX4, ura3::KanMX4/ura3::KanMX4, lys2::URA3/LYS2
11	D6	46x232	MAT a/α, ho::HphMX4/ho::HphMX4, ura3::KanMX4/ura3::KanMX4, lys2::URA3/LYS2
11	D7	13x233	MAT a/α, ho::HphMX4/ho::HphMX4, ura3::KanMX4/ura3::KanMX4, lys2::URA3/LYS2
11	D8	27x212	MAT a/α, ho::HphMX4/ho::HphMX4, ura3::KanMX4/ura3::KanMX4, lys2::URA3/LYS2
11	D9	40x235	MAT a/α, ho::HphMX4/ho::HphMX4, ura3::KanMX4/ura3::KanMX4, lys2::URA3/LYS2
11	D10	52x236	MAT a/α, ho::HphMX4/ho::HphMX4, ura3::KanMX4/ura3::KanMX4, lys2::URA3/LYS2
11	D11	11x291	MAT a/α, ho::HphMX4/ho::HphMX4, ura3::KanMX4/ura3::KanMX4, lys2::URA3/LYS2
11	D12	WAxWA (CC425)	MAT a/α, ho::HphMX4/ho::HphMX4, ura3::KanMX4/ura3::KanMX4, lys2::URA3/LYS2
11	E1	26x239	MAT a/α, ho::HphMX4/ho::HphMX4, ura3::KanMX4/ura3::KanMX4, lys2::URA3/LYS2
11	E2	51x241	MAT a/α, ho::HphMX4/ho::HphMX4, ura3::KanMX4/ura3::KanMX4, lys2::URA3/LYS2
11	E3	55x243	MAT a/α, ho::HphMX4/ho::HphMX4, ura3::KanMX4/ura3::KanMX4, lys2::URA3/LYS2
11	E4	56x244	MAT a/α, ho::HphMX4/ho::HphMX4, ura3::KanMX4/ura3::KanMX4, lys2::URA3/LYS2
11	E5	57x245	MAT a/α, ho::HphMX4/ho::HphMX4, ura3::KanMX4/ura3::KanMX4, lys2::URA3/LYS2
11	E6	132x246	MAT a/α, ho::HphMX4/ho::HphMX4, ura3::KanMX4/ura3::KanMX4, lys2::URA3/LYS2
11	E7	59x247	MAT a/α, ho::HphMX4/ho::HphMX4, ura3::KanMX4/ura3::KanMX4, lys2::URA3/LYS2
11	E8	60x248	MAT a/α, ho::HphMX4/ho::HphMX4, ura3::KanMX4/ura3::KanMX4, lys2::URA3/LYS2
11	E9	61x224	MAT a/α, ho::HphMX4/ho::HphMX4, ura3::KanMX4/ura3::KanMX4, lys2::URA3/LYS2
11	E10	62x252	MAT a/α, ho::HphMX4/ho::HphMX4, ura3::KanMX4/ura3::KanMX4, lys2::URA3/LYS2
11	E11	26x201	MAT a/α, ho::HphMX4/ho::HphMX4, ura3::KanMX4/ura3::KanMX4, lys2::URA3/LYS2
11	E12	NAxNA (CC439)	MAT a/α, ho::HphMX4/ho::HphMX4, ura3::KanMX4/ura3::KanMX4, lys2::URA3/LYS2
11	F1	65x253	MAT a/α, ho::HphMX4/ho::HphMX4, ura3::KanMX4/ura3::KanMX4, lys2::URA3/LYS2
11	F2	66x251	MAT a/α, ho::HphMX4/ho::HphMX4, ura3::KanMX4/ura3::KanMX4, lys2::URA3/LYS2
11	F3	63x255	MAT a/α, ho::HphMX4/ho::HphMX4, ura3::KanMX4/ura3::KanMX4, lys2::URA3/LYS2
11	F4	68x276	MAT a/α, ho::HphMX4/ho::HphMX4, ura3::KanMX4/ura3::KanMX4, lys2::URA3/LYS2
11	F5	69x257	MAT a/α, ho::HphMX4/ho::HphMX4, ura3::KanMX4/ura3::KanMX4, lys2::URA3/LYS2
11	F6	70x305	MAT a/α, ho::HphMX4/ho::HphMX4, ura3::KanMX4/ura3::KanMX4, lys2::URA3/LYS2
11	F7	71x259	MAT a/α, ho::HphMX4/ho::HphMX4, ura3::KanMX4/ura3::KanMX4, lys2::URA3/LYS2
11	F8	72x260	MAT a/α, ho::HphMX4/ho::HphMX4, ura3::KanMX4/ura3::KanMX4, lys2::URA3/LYS2
11	F9	73x261	MAT a/α, ho::HphMX4/ho::HphMX4, ura3::KanMX4/ura3::KanMX4, lys2::URA3/LYS2
11	F10	74x262	MAT a/α, ho::HphMX4/ho::HphMX4, ura3::KanMX4/ura3::KanMX4, lys2::URA3/LYS2
11	F11	65x213	MAT a/α, ho::HphMX4/ho::HphMX4, ura3::KanMX4/ura3::KanMX4, lys2::URA3/LYS2
11	F12	NAxWA (CC429)	MAT a/α, ho::HphMX4/ho::HphMX4, ura3::KanMX4/ura3::KanMX4, lys2::URA3/LYS2
11	G1	77x265	MAT a/α, ho::HphMX4/ho::HphMX4, ura3::KanMX4/ura3::KanMX4, lys2::URA3/LYS2
11	G2	78x266	MAT a/α, ho::HphMX4/ho::HphMX4, ura3::KanMX4/ura3::KanMX4, lys2::URA3/LYS2
11	G3	75x267	MAT a/α, ho::HphMX4/ho::HphMX4, ura3::KanMX4/ura3::KanMX4, lys2::URA3/LYS2
11	G4	80x268	MAT a/α, ho::HphMX4/ho::HphMX4, ura3::KanMX4/ura3::KanMX4, lys2::URA3/LYS2
11	G5	81x270	MAT a/α, ho::HphMX4/ho::HphMX4, ura3::KanMX4/ura3::KanMX4, lys2::URA3/LYS2
11	G6	82x271	MAT a/α, ho::HphMX4/ho::HphMX4, ura3::KanMX4/ura3::KanMX4, lys2::URA3/LYS2
11	G7	83x272	MAT a/α, ho::HphMX4/ho::HphMX4, ura3::KanMX4/ura3::KanMX4, lys2::URA3/LYS2
11	G8	84x273	MAT a/α, ho::HphMX4/ho::HphMX4, ura3::KanMX4/ura3::KanMX4, lys2::URA3/LYS2
11	G9	85x274	MAT a/α, ho::HphMX4/ho::HphMX4, ura3::KanMX4/ura3::KanMX4, lys2::URA3/LYS2
11	G10	86x275	MAT a/α, ho::HphMX4/ho::HphMX4, ura3::KanMX4/ura3::KanMX4, lys2::URA3/LYS2
11	G11	77x227	MAT a/α, ho::HphMX4/ho::HphMX4, ura3::KanMX4/ura3::KanMX4, lys2::URA3/LYS2
11	G12	WAxWA (CC426)	MAT a/α, ho::HphMX4/ho::HphMX4, ura3::KanMX4/ura3::KanMX4, lys2::URA3/LYS2
11	H1	121x211	MAT a/α, ho::HphMX4/ho::HphMX4, ura3::KanMX4/ura3::KanMX4, lys2::URA3/LYS2
11	H2	122x279	MAT a/α, ho::HphMX4/ho::HphMX4, ura3::KanMX4/ura3::KanMX4, lys2::URA3/LYS2
11	H3	123x280	MAT a/α, ho::HphMX4/ho::HphMX4, ura3::KanMX4/ura3::KanMX4, lys2::URA3/LYS2
11	H4	124x281	MAT a/α, ho::HphMX4/ho::HphMX4, ura3::KanMX4/ura3::KanMX4, lys2::URA3/LYS2
11	H5	126x282	MAT a/α, ho::HphMX4/ho::HphMX4, ura3::KanMX4/ura3::KanMX4, lys2::URA3/LYS2
11	H6	127x283	MAT a/α, ho::HphMX4/ho::HphMX4, ura3::KanMX4/ura3::KanMX4, lys2::URA3/LYS2
11	H7	128x284	MAT a/α, ho::HphMX4/ho::HphMX4, ura3::KanMX4/ura3::KanMX4, lys2::URA3/LYS2
11	H8	129x286	MAT a/α, ho::HphMX4/ho::HphMX4, ura3::KanMX4/ura3::KanMX4, lys2::URA3/LYS2
11	H9	130x287	MAT a/α, ho::HphMX4/ho::HphMX4, ura3::KanMX4/ura3::KanMX4, lys2::URA3/LYS2
11	H10	131x277	MAT a/α, ho::HphMX4/ho::HphMX4, ura3::KanMX4/ura3::KanMX4, lys2::URA3/LYS2
11	H11	121x239	MAT a/α, ho::HphMX4/ho::HphMX4, ura3::KanMX4/ura3::KanMX4, lys2::URA3/LYS2
11	H12	NAxNA (CC440)	MAT a/α, ho::HphMX4/ho::HphMX4, ura3::KanMX4/ura3::KanMX4, lys2::URA3/LYS2
12	A1	1x211	MAT a/α, ho::HphMX4/ho::HphMX4, ura3::KanMX4/ura3::KanMX4, lys2::URA3/LYS2
12	A2	39x279	MAT a/α, ho::HphMX4/ho::HphMX4, ura3::KanMX4/ura3::KanMX4, lys2::URA3/LYS2
12	A3	3x280	MAT a/α, ho::HphMX4/ho::HphMX4, ura3::KanMX4/ura3::KanMX4, lys2::URA3/LYS2
12	A4	4x281	MAT a/α, ho::HphMX4/ho::HphMX4, ura3::KanMX4/ura3::KanMX4, lys2::URA3/LYS2
12	A5	5x282	MAT a/α, ho::HphMX4/ho::HphMX4, ura3::KanMX4/ura3::KanMX4, lys2::URA3/LYS2
12	A6	6x283	MAT a/α, ho::HphMX4/ho::HphMX4, ura3::KanMX4/ura3::KanMX4, lys2::URA3/LYS2
12	A7	7x284	MAT a/α, ho::HphMX4/ho::HphMX4, ura3::KanMX4/ura3::KanMX4, lys2::URA3/LYS2
12	A8	8x286	MAT a/α, ho::HphMX4/ho::HphMX4, ura3::KanMX4/ura3::KanMX4, lys2::URA3/LYS2
12	A9	9x287	MAT a/α, ho::HphMX4/ho::HphMX4, ura3::KanMX4/ura3::KanMX4, lys2::URA3/LYS2
12	A10	10x277	MAT a/α, ho::HphMX4/ho::HphMX4, ura3::KanMX4/ura3::KanMX4, lys2::URA3/LYS2
12	A11	39x251	MAT a/α, ho::HphMX4/ho::HphMX4, ura3::KanMX4/ura3::KanMX4, lys2::URA3/LYS2
12	A12	WAxWA (CC424)	MAT a/α, ho::HphMX4/ho::HphMX4, ura3::KanMX4/ura3::KanMX4, lys2::URA3/LYS2
12	B1	14x291	MAT a/α, ho::HphMX4/ho::HphMX4, ura3::KanMX4/ura3::KanMX4, lys2::URA3/LYS2
12	B2	15x292	MAT a/α, ho::HphMX4/ho::HphMX4, ura3::KanMX4/ura3::KanMX4, lys2::URA3/LYS2
12	B3	16x293	MAT a/α, ho::HphMX4/ho::HphMX4, ura3::KanMX4/ura3::KanMX4, lys2::URA3/LYS2
12	B4	17x295	MAT a/α, ho::HphMX4/ho::HphMX4, ura3::KanMX4/ura3::KanMX4, lys2::URA3/LYS2
12	B5	18x296	MAT a/α, ho::HphMX4/ho::HphMX4, ura3::KanMX4/ura3::KanMX4, lys2::URA3/LYS2
12	B6	19x297	MAT a/α, ho::HphMX4/ho::HphMX4, ura3::KanMX4/ura3::KanMX4, lys2::URA3/LYS2
12	B7	21x298	MAT a/α, ho::HphMX4/ho::HphMX4, ura3::KanMX4/ura3::KanMX4, lys2::URA3/LYS2
12	B8	22x300	MAT a/α, ho::HphMX4/ho::HphMX4, ura3::KanMX4/ura3::KanMX4, lys2::URA3/LYS2
12	B9	24x301	MAT a/α, ho::HphMX4/ho::HphMX4, ura3::KanMX4/ura3::KanMX4, lys2::URA3/LYS2
12	B10	25x304	MAT a/α, ho::HphMX4/ho::HphMX4, ura3::KanMX4/ura3::KanMX4, lys2::URA3/LYS2
12	B11	15x266	MAT a/α, ho::HphMX4/ho::HphMX4, ura3::KanMX4/ura3::KanMX4, lys2::URA3/LYS2
12	B12	NAxNA (CC438)	MAT a/α, ho::HphMX4/ho::HphMX4, ura3::KanMX4/ura3::KanMX4, lys2::URA3/LYS2
12	C1	28x201	MAT a/α, ho::HphMX4/ho::HphMX4, ura3::KanMX4/ura3::KanMX4, lys2::URA3/LYS2
12	C2	29x237	MAT a/α, ho::HphMX4/ho::HphMX4, ura3::KanMX4/ura3::KanMX4, lys2::URA3/LYS2
12	C3	30x203	MAT a/α, ho::HphMX4/ho::HphMX4, ura3::KanMX4/ura3::KanMX4, lys2::URA3/LYS2
12	C4	32x204	MAT a/α, ho::HphMX4/ho::HphMX4, ura3::KanMX4/ura3::KanMX4, lys2::URA3/LYS2
12	C5	33x205	MAT a/α, ho::HphMX4/ho::HphMX4, ura3::KanMX4/ura3::KanMX4, lys2::URA3/LYS2
12	C6	34x289	MAT a/α, ho::HphMX4/ho::HphMX4, ura3::KanMX4/ura3::KanMX4, lys2::URA3/LYS2
12	C7	35x207	MAT a/α, ho::HphMX4/ho::HphMX4, ura3::KanMX4/ura3::KanMX4, lys2::URA3/LYS2
12	C8	36x208	MAT a/α, ho::HphMX4/ho::HphMX4, ura3::KanMX4/ura3::KanMX4, lys2::URA3/LYS2
12	C9	37x209	MAT a/α, ho::HphMX4/ho::HphMX4, ura3::KanMX4/ura3::KanMX4, lys2::URA3/LYS2
12	C10	38x210	MAT a/α, ho::HphMX4/ho::HphMX4, ura3::KanMX4/ura3::KanMX4, lys2::URA3/LYS2
12	C11	29x279	MAT a/α, ho::HphMX4/ho::HphMX4, ura3::KanMX4/ura3::KanMX4, lys2::URA3/LYS2
12	C12	NAxWA (CC428)	MAT a/α, ho::HphMX4/ho::HphMX4, ura3::KanMX4/ura3::KanMX4, lys2::URA3/LYS2
12	D1	11x213	MAT a/α, ho::HphMX4/ho::HphMX4, ura3::KanMX4/ura3::KanMX4, lys2::URA3/LYS2
12	D2	42x214	MAT a/α, ho::HphMX4/ho::HphMX4, ura3::KanMX4/ura3::KanMX4, lys2::URA3/LYS2
12	D3	43x215	MAT a/α, ho::HphMX4/ho::HphMX4, ura3::KanMX4/ura3::KanMX4, lys2::URA3/LYS2
12	D4	44x216	MAT a/α, ho::HphMX4/ho::HphMX4, ura3::KanMX4/ura3::KanMX4, lys2::URA3/LYS2
12	D5	45x217	MAT a/α, ho::HphMX4/ho::HphMX4, ura3::KanMX4/ura3::KanMX4, lys2::URA3/LYS2
12	D6	46x218	MAT a/α, ho::HphMX4/ho::HphMX4, ura3::KanMX4/ura3::KanMX4, lys2::URA3/LYS2
12	D7	13x219	MAT a/α, ho::HphMX4/ho::HphMX4, ura3::KanMX4/ura3::KanMX4, lys2::URA3/LYS2
12	D8	27x220	MAT a/α, ho::HphMX4/ho::HphMX4, ura3::KanMX4/ura3::KanMX4, lys2::URA3/LYS2
12	D9	40x221	MAT a/α, ho::HphMX4/ho::HphMX4, ura3::KanMX4/ura3::KanMX4, lys2::URA3/LYS2
12	D10	52x238	MAT a/α, ho::HphMX4/ho::HphMX4, ura3::KanMX4/ura3::KanMX4, lys2::URA3/LYS2
12	D11	42x292	MAT a/α, ho::HphMX4/ho::HphMX4, ura3::KanMX4/ura3::KanMX4, lys2::URA3/LYS2
12	D12	WAxWA (CC425)	MAT a/α, ho::HphMX4/ho::HphMX4, ura3::KanMX4/ura3::KanMX4, lys2::URA3/LYS2
12	E1	26x227	MAT a/α, ho::HphMX4/ho::HphMX4, ura3::KanMX4/ura3::KanMX4, lys2::URA3/LYS2
12	E2	51x228	MAT a/α, ho::HphMX4/ho::HphMX4, ura3::KanMX4/ura3::KanMX4, lys2::URA3/LYS2
12	E3	55x229	MAT a/α, ho::HphMX4/ho::HphMX4, ura3::KanMX4/ura3::KanMX4, lys2::URA3/LYS2
12	E4	56x263	MAT a/α, ho::HphMX4/ho::HphMX4, ura3::KanMX4/ura3::KanMX4, lys2::URA3/LYS2
12	E5	57x231	MAT a/α, ho::HphMX4/ho::HphMX4, ura3::KanMX4/ura3::KanMX4, lys2::URA3/LYS2
12	E6	132x232	MAT a/α, ho::HphMX4/ho::HphMX4, ura3::KanMX4/ura3::KanMX4, lys2::URA3/LYS2
12	E7	59x233	MAT a/α, ho::HphMX4/ho::HphMX4, ura3::KanMX4/ura3::KanMX4, lys2::URA3/LYS2
12	E8	60x212	MAT a/α, ho::HphMX4/ho::HphMX4, ura3::KanMX4/ura3::KanMX4, lys2::URA3/LYS2
12	E9	61x235	MAT a/α, ho::HphMX4/ho::HphMX4, ura3::KanMX4/ura3::KanMX4, lys2::URA3/LYS2
12	E10	62x236	MAT a/α, ho::HphMX4/ho::HphMX4, ura3::KanMX4/ura3::KanMX4, lys2::URA3/LYS2
12	E11	51x237	MAT a/α, ho::HphMX4/ho::HphMX4, ura3::KanMX4/ura3::KanMX4, lys2::URA3/LYS2
12	E12	NAxNA (CC439)	MAT a/α, ho::HphMX4/ho::HphMX4, ura3::KanMX4/ura3::KanMX4, lys2::URA3/LYS2
12	F1	65x239	MAT a/α, ho::HphMX4/ho::HphMX4, ura3::KanMX4/ura3::KanMX4, lys2::URA3/LYS2
12	F2	66x241	MAT a/α, ho::HphMX4/ho::HphMX4, ura3::KanMX4/ura3::KanMX4, lys2::URA3/LYS2
12	F3	63x243	MAT a/α, ho::HphMX4/ho::HphMX4, ura3::KanMX4/ura3::KanMX4, lys2::URA3/LYS2
12	F4	68x244	MAT a/α, ho::HphMX4/ho::HphMX4, ura3::KanMX4/ura3::KanMX4, lys2::URA3/LYS2
12	F5	69x245	MAT a/α, ho::HphMX4/ho::HphMX4, ura3::KanMX4/ura3::KanMX4, lys2::URA3/LYS2
12	F6	70x246	MAT a/α, ho::HphMX4/ho::HphMX4, ura3::KanMX4/ura3::KanMX4, lys2::URA3/LYS2
12	F7	71x247	MAT a/α, ho::HphMX4/ho::HphMX4, ura3::KanMX4/ura3::KanMX4, lys2::URA3/LYS2
12	F8	72x248	MAT a/α, ho::HphMX4/ho::HphMX4, ura3::KanMX4/ura3::KanMX4, lys2::URA3/LYS2
12	F9	73x224	MAT a/α, ho::HphMX4/ho::HphMX4, ura3::KanMX4/ura3::KanMX4, lys2::URA3/LYS2
12	F10	74x252	MAT a/α, ho::HphMX4/ho::HphMX4, ura3::KanMX4/ura3::KanMX4, lys2::URA3/LYS2
12	F11	66x214	MAT a/α, ho::HphMX4/ho::HphMX4, ura3::KanMX4/ura3::KanMX4, lys2::URA3/LYS2
12	F12	NAxWA (CC429)	MAT a/α, ho::HphMX4/ho::HphMX4, ura3::KanMX4/ura3::KanMX4, lys2::URA3/LYS2
12	G1	77x253	MAT a/α, ho::HphMX4/ho::HphMX4, ura3::KanMX4/ura3::KanMX4, lys2::URA3/LYS2
12	G2	78x251	MAT a/α, ho::HphMX4/ho::HphMX4, ura3::KanMX4/ura3::KanMX4, lys2::URA3/LYS2
12	G3	75x255	MAT a/α, ho::HphMX4/ho::HphMX4, ura3::KanMX4/ura3::KanMX4, lys2::URA3/LYS2
12	G4	80x276	MAT a/α, ho::HphMX4/ho::HphMX4, ura3::KanMX4/ura3::KanMX4, lys2::URA3/LYS2
12	G5	81x257	MAT a/α, ho::HphMX4/ho::HphMX4, ura3::KanMX4/ura3::KanMX4, lys2::URA3/LYS2
12	G6	82x305	MAT a/α, ho::HphMX4/ho::HphMX4, ura3::KanMX4/ura3::KanMX4, lys2::URA3/LYS2
12	G7	83x259	MAT a/α, ho::HphMX4/ho::HphMX4, ura3::KanMX4/ura3::KanMX4, lys2::URA3/LYS2
12	G8	84x260	MAT a/α, ho::HphMX4/ho::HphMX4, ura3::KanMX4/ura3::KanMX4, lys2::URA3/LYS2
12	G9	85x261	MAT a/α, ho::HphMX4/ho::HphMX4, ura3::KanMX4/ura3::KanMX4, lys2::URA3/LYS2
12	G10	86x262	MAT a/α, ho::HphMX4/ho::HphMX4, ura3::KanMX4/ura3::KanMX4, lys2::URA3/LYS2
12	G11	78x228	MAT a/α, ho::HphMX4/ho::HphMX4, ura3::KanMX4/ura3::KanMX4, lys2::URA3/LYS2
12	G12	WAxWA (CC426)	MAT a/α, ho::HphMX4/ho::HphMX4, ura3::KanMX4/ura3::KanMX4, lys2::URA3/LYS2
12	H1	121x265	MAT a/α, ho::HphMX4/ho::HphMX4, ura3::KanMX4/ura3::KanMX4, lys2::URA3/LYS2
12	H2	122x266	MAT a/α, ho::HphMX4/ho::HphMX4, ura3::KanMX4/ura3::KanMX4, lys2::URA3/LYS2
12	H3	123x267	MAT a/α, ho::HphMX4/ho::HphMX4, ura3::KanMX4/ura3::KanMX4, lys2::URA3/LYS2
12	H4	124x268	MAT a/α, ho::HphMX4/ho::HphMX4, ura3::KanMX4/ura3::KanMX4, lys2::URA3/LYS2
12	H5	126x270	MAT a/α, ho::HphMX4/ho::HphMX4, ura3::KanMX4/ura3::KanMX4, lys2::URA3/LYS2
12	H6	127x271	MAT a/α, ho::HphMX4/ho::HphMX4, ura3::KanMX4/ura3::KanMX4, lys2::URA3/LYS2
12	H7	128x272	MAT a/α, ho::HphMX4/ho::HphMX4, ura3::KanMX4/ura3::KanMX4, lys2::URA3/LYS2
12	H8	129x273	MAT a/α, ho::HphMX4/ho::HphMX4, ura3::KanMX4/ura3::KanMX4, lys2::URA3/LYS2
12	H9	130x274	MAT a/α, ho::HphMX4/ho::HphMX4, ura3::KanMX4/ura3::KanMX4, lys2::URA3/LYS2
12	H10	131x275	MAT a/α, ho::HphMX4/ho::HphMX4, ura3::KanMX4/ura3::KanMX4, lys2::URA3/LYS2
12	H11	122x241	MAT a/α, ho::HphMX4/ho::HphMX4, ura3::KanMX4/ura3::KanMX4, lys2::URA3/LYS2
12	H12	NAxNA (CC440)	MAT a/α, ho::HphMX4/ho::HphMX4, ura3::KanMX4/ura3::KanMX4, lys2::URA3/LYS2
