# Supplementary material for: Intragenic repeat expansion in the cell wall protein gene HPF1 controls yeast chronological aging
Source: Genome Res. 2020 May;30(5):697–710. doi: 10.1101/gr.253351.119 (PMC7263189; doi:10.1101/gr.253351.119)
Supplement: Supplemental Material [file supp_gr.253351.119_Supplemental_Table_S2.xlsx]

## Sheet: Primer list
Table S2 - Primer list
Number	Name	Sequence	Length (bp)	Details
144	URA_S5	CCTTTTGATGTTAGCAGAATTGTC	24	Binds in URA3 ORF
145	URA_S8	CCTCTAGGTTCCTTTGTTACTTCT	24	Binds in URA3 ORF
476	NAT_S5	CGTGGTCATCTCGTACTCGG	20	Binds in NatMX4
477	NAT_S8	TCCGATTCGTCGTCCGATTC	20	Binds in NatMX4
714	HPF1_S8	GGACGAGGTTGATGGAGCAA	20	Binds in HPF1 ORF
715	HPF1_S5	AGCTACTTCAACCGTCACCG	20	Binds in HPF1 ORF
812	FLO11_FW_NAT	ATGCAAAGACCATTTCTACTCGCTTATTTGGTCCTTTCGCTTCTACGTACGCTGCAGGTCGAC	63	Amplifies NatMX4 cassette and shares homology with FLO11 to fully delete ORF by homologous recombination
813	FLO11_RV_NAT	TTAGAATACAACTGGAAGAGCGAGTAGCAACCACATAAAGTTTCCATCGATGAATTCGAGCTCG	64	Amplifies NatMX4 cassette and shares homology with FLO11 to fully delete ORF by homologous recombination
817	FLO11_A4	GAGAGGGAAAAGTGGCGC	18	Binds in FLO11 terminator
855	HPF1_FW_NAT	GTCAGTAACAACAAATACCCATCGTTGATTCTTTTTGGTAAGATCTCGCCTGTCAAAGAGCGTACGCTGCAGGTCGAC	78	Amplifies NatMX4 cassette and shares homology with HPF1 to fully delete ORF by homologous recombination
856	HPF1_RV_NAT	GCATATTAAGAACCTATCTCGTTTCAGAGGAATAAACTTTTAATTCCTCAGTTAAAAAAAATCGATGAATTCGAGCTCG	79	Amplifies NatMX4 cassette and shares homology with HPF1 to fully delete ORF by homologous recombination
857	HPF1_A1	CGCAGAAGTGCCCGTAGGAG	20	Binds in HPF1 promoter. Also used to amplify and swap back HPF1 Nterminal repeats
975	HPF1_A4	GAACCTATCTCGTTTCAGAGG	21	Binds in HPF1 terminator
980	HPF1_Rep1_FW	CATTAACATATGCAACAACC	20	Binds in HPF1 ORF
981	HPF1_Rep1_RV	TGCAGATTTGGAGTATGTGG	20	Binds in HPF1 ORF
983	HPF1_Rep2_RV	AACTTAAGGTACCGGAGGTG	20	Used to amplify and swap back HPF1 Nterminal repeats
1038	HPF1_qPCR2_FW	GCTACCAACTCTACTTCCGG	20	Amplifies and swap HPF1 Cterminal repeats
1105	WA_HPF1_Rvnter_URA	ATGGTCAAACCCATTGCTACACTTCAAGCCGTTTTGGCTTCGCTCCTTTACACACCGCAGGGTAATAACTG	71	Amplifies URA3 cassette (from pRS316) and specifically targets HPF1 Nterminals repeats for deletion (WA allele)
1106	NA_HPF1_Rvnter_URA	ATGTTCAATCGCTTTAATAAACTTCAAGCCGCTTTGGCTTTGGTCCTTTACACACCGCAGGGTAATAACTG	71	Amplifies URA3 cassette (from pRS316) and specifically targets HPF1 Nterminals repeats for deletion (NA allele)
1107	HPF1_FWcter_URA	CCTGCGGCAATACCCTCGGACTGGACAATGATACCAGTAGAGGTCTTTATCGGCATCAGAGCAGATTGTACTG	73	Amplifies URA3 cassette (from pRS316) and specifically targets HPF1 Cterminals repeats for deletion
1108	HPF1_RVcter_URA	TGACTGGTTCAACGGCTTCCACCTTGACTTCCGGCTCCCCATCTGTTTATACACCGCAGGGTAATAACTG	70	Amplifies URA3 cassette (from pRS316) and specifically targets HPF1 Cterminals repeats for deletion
1137	HPF1_FWnter_URA	GAACCGGAGGCAGTGGAAGCCGATGAGGTTGATTGAGGAATTGAACTCGACGGCATCAGAGCAGATTGTACTG	73	Amplifies URA3 cassette (from pRS316) and specifically targets HPF1 Nterminals repeats for deletion
1138	HPF1_FWint_URA	GATGAGGGTGTAGCGCTGGAAGCAACAACACCTCCGTAATTTAGATAATACGGCATCAGAGCAGATTGTACTG	73	Amplifies URA3 cassette (from pRS316) and specifically targets HPF1 internal part for deletion
1139	HPF1_RVint_URA	CGAGTTCAATTCCTCAATCAACCTCATCGGCTTCCACTGCCTCCGGTTCTACACCGCAGGGTAATAACTG	70	Amplifies URA3 cassette (from pRS316) and specifically targets HPF1 internal part for deletion
1140	HPF1_S8bis	TACCGACCAATGCATTCAAAG	21	Used to amplify and swap back HPF1 Cterminal repeats
1145	HPF1_S5bis	TCCGTTTCCGGTTCATCAGC	20	Used to amplify and swap back HPF1 internal unique part
1146	HPF1_S5bis2	ACAATCAACATCATCTCTGG	20	Binds in HPF1 ORF
1147	HPF1_S8bis2	GGAAGCACCAAATGAAGTGG	20	Used to amplify and swap back HPF1 internal unique part
1281	MXR1_qPCR_FW	ATCGCAGTGGATTGTTCGCT	20	Used for MXR1 qPCR
1282	MXR1_qPCR_RV	ACCCCATTTTGGTTGCCATTC	21	Used for MXR1 qPCR
1461	CYC1_RV_HO	TTTAAAATGCTTTCTGAAAACACGACTATTCTGATGGCTAACGGTGAAATGCAAATTAAAGCCTTCGAGCGTC	73	Amplifies CYC1 terminator and upstream gene and shares homology with HO for genomic insertion
1492	TEF1_FW_HO	CAGTGATGACCGCTGAATTTGTATCTTCCATAGCATCTAGCACATACTCGCATAGCTTCAAAATGTTTCTACTCCTTTTT	80	Amplifies TEF1 promoter and downstream gene and shares homology with HO for genomic insertion
1532	FLO11_FW_URA3	CCTATTTGATTGACAACCCAACTGATTTCACAGCCACTTTTGAAGTCTATGCCACACAAGCGGCATCAGAGCAGATTGTACTG	83	Deletion of FLO11 intragenic tandem repeats with URA3
1533	FLO11_RV_URA3	GGAGATGTGACAACGGGAGCCATGCTAGAAGCAGAAGCTGTTGTAGCTAGTTGGGATGTAACACCGCAGGGTAATAACTG	80	Deletion of FLO11 intragenic tandem repeats with URA3
1534	FLO11_A1	AGACTTACCAGTACAAGTTG	20	Binds in FLO11 promoter
1537	FLO11_FW_Rep	CCTATTTGATTGACAACCCA	20	Used to amplify and swap FLO11 intragenic tandem repeats
1538	FLO11_RV_Rep	GGAGATGTGACAACGGGAGC	20	Used to amplify and swap FLO11 intragenic tandem repeats
1539	MXR1_FW_SpeI	GATACAACTAGTATGTCGTCGCTTATTTCAAA	32	Amplification of MXR1 flanked with a SpeI restriction site for cloning
1540	MXR1_RV_BamHI	GATACAGGATCCCTACATTTCTCTCAGATAAT	32	Amplification of MXR1 flanked with a BamHI restriction site for cloning
1541	CTT1_FW_SpeI	GATACAACTAGTATGAACGTGTTCGGTAAAAA	32	Amplification of CTT1 flanked with a SpeI restriction site for cloning
1542	CTT1_RV_BamHI	GATACAGGATCCTTAATTGGCACTTGCAATGG	32	Amplification of CTT1 flanked with a BamHI restriction site for cloning
1543	SOD1_FW_SpeI	GATACAACTAGTATGGTTCAAGCAGTCGCAGT	32	Amplification of SOD1 flanked with a SpeI restriction site for cloning
1544	SOD1_RV_BamHI	GATACAGGATCCTTAGTTGGTTAGACCAATGA	32	Amplification of SOD1 flanked with a BamHI restriction site for cloning
1545	CTT1_qPCR_FW	CAAGACCAGACGGCCCTATC	20	Used for CTT1 qPCR
1546	CTT1_qPCR_RV	GACTACACGCTCCGGAACTC	20	Used for CTT1 qPCR
1547	SOD1_qPCR_FW	AGGCAGAAGCGTCGTTATCC	20	Used for SOD1 qPCR
1548	SOD1_qPCR_RV	TGGTCTTGGACCGGCATTAC	20	Used for SOD1 qPCR
